# Supplementary material for: Generation of 4-((trifluoromethyl)thio)-2H-benzo[e][1,2]thiazine 1,1-dioxides via a reaction of trifluoromethanesulfanylamide with 2-(2-alkynyl)benzenesulfonamide
Source: Royal Society of Chemistry journal article supplement (doi:10.1039/c3cc44263b), 2013-01-01

**Generation of**  
**4-((trifluoromethyl)thio)-2*H*-benzo[*e*][1,2]thiazine**  
**1,1-dioxides via a reaction of trifluoromethanesulfanylamide**  
**with 2-(2-alkynyl)benzenesulfonamide**

Qing Xiao,<sup>a</sup> Jie Sheng,<sup>b</sup> Zhiyuan Chen,<sup>\*,a</sup> and Jie Wu<sup>\*,b</sup>

<sup>a</sup> *Key Laboratory of Functional Small Organic Molecules, Ministry of Education and College of Chemistry & Chemical Engineering, Jiangxi Normal University, Nanchang, Jiangxi 330022, China*

<sup>b</sup> *Department of Chemistry, Fudan University, 220 Handan Road, Shanghai 200433, China*

jie\_wu@fudan.edu.cn

**Supporting Information**

1. General experimental methods (S2).
2. General experimental procedure and characterization data (S3-S12).
3. <sup>19</sup>F, <sup>1</sup>H and <sup>13</sup>C NMR spectra of compounds **3** and **4** (S13-S93).

## General experimental methods:

Unless otherwise stated, all commercial reagents were used as received. All solvents were dried and distilled according to standard procedures. Flash column chromatography was performed using silica gel (60-Å pore size, 32–63 µm, standard grade). Analytical thin-layer chromatography was performed using glass plates pre-coated with 0.25 mm 230–400 mesh silica gel impregnated with a fluorescent indicator (254 nm). Thin layer chromatography plates were visualized by exposure to ultraviolet light. Organic solutions were concentrated on rotary evaporators at ~20 Torr at 25–35 °C. Nuclear magnetic resonance (NMR) spectra are recorded in parts per million from internal tetramethylsilane on the  $\delta$  scale.  $^1\text{H}$  and  $^{13}\text{C}$  NMR spectra were recorded in  $\text{CDCl}_3$  on a Bruker DRX-400 spectrometer operating at 400 MHz and 100 MHz, respectively. All chemical shift values are quoted in ppm and coupling constants quoted in Hz. High resolution mass spectrometry (HRMS) spectra were obtained on a micrOTOF II Instrument.

### *Synthesis of 4-((trifluoromethyl)thio)-2H-benzo[e][1,2]thiazine 1,1-dioxides via a reaction of trifluoromethanesulfanylamide with 2-(2-alkynyl)benzenesulfonamide*

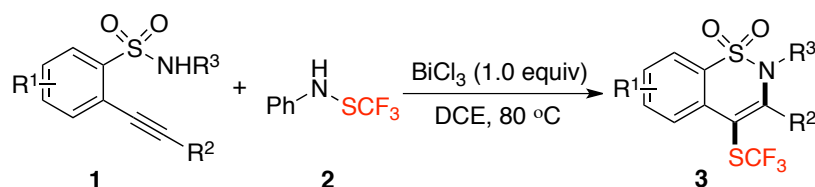

2-(2-Alkynyl)benzenesulfonamide **1** (0.2 mmol) was added to a solution of  $\text{BiCl}_3$  (0.2 mmol) in DCE (2.0 mL) under  $\text{N}_2$  atmosphere. Then trifluoromethanesulfanylamide **2** (0.6 mmol) was added. The mixture was stirred at 80 °C. After completion of reaction as indicated by TLC (~16 h), the mixture was purified by flash column chromatograph ( $\text{EtOAc}/n\text{-hexane}$ , 1:20) to give the desired product **3**. Excess trifluoromethanesulfanylamide **2** could be recycled.

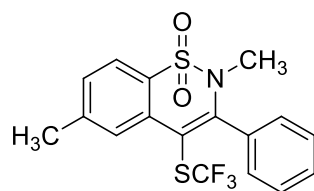

2,6-Dimethyl-3-phenyl-4-((trifluoromethyl)thio)-2*H*-benzo[*e*][1,2]thiazine

1,1-dioxide (**3a**):  $^1\text{H}$  NMR (400 MHz,  $\text{CDCl}_3$ )  $\delta$  8.01 (s, 1H), 7.83 (d,  $J = 8.0$  Hz, 1H), 7.52-7.50 (m, 3H), 7.41-7.39 (m, 3H), 3.02 (s, 3H), 2.53 (s, 3H).  $^{13}\text{C}$  NMR (100 MHz,  $\text{CDCl}_3$ )  $\delta$  153.5, 143.1, 134.3, 133.8, 130.3, 129.7, 129.5, 129.1, 128.8 (q,  $J = 312.8$  Hz), 128.7, 127.5, 121.6, 104.6, 34.8, 21.9;  $^{19}\text{F}$  NMR (378 MHz,  $\text{CDCl}_3$ )  $\delta$  -43.17; HRMS (ESI) calcd for  $\text{C}_{17}\text{H}_{15}\text{F}_3\text{NO}_2\text{S}_2^+$ : 386.0491  $[\text{M} + \text{H}^+]$ , found: 386.0479.

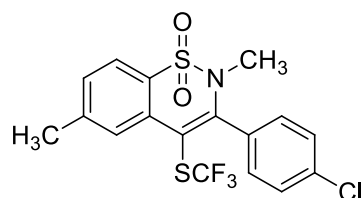

3-(4-Chlorophenyl)-2,6-dimethyl-4-((trifluoromethyl)thio)-2*H*-benzo[*e*][1,2]thiazine

1,1-dioxide (**3b**):  $^1\text{H}$  NMR (400 MHz,  $\text{CDCl}_3$ )  $\delta$  7.99 (s, 1H), 7.82 (d,  $J = 8.0$  Hz, 1H), 7.50 (d,  $J = 8.4$  Hz, 2H), 7.40 (d,  $J = 8.0$  Hz, 1H), 7.35 (d,  $J = 8.4$  Hz, 2H), 3.02 (s, 4H), 2.53 (s, 3H).  $^{13}\text{C}$  NMR (100 MHz,  $\text{CDCl}_3$ )  $\delta$  152.2, 143.2, 136.6, 134.0, 132.2, 131.1, 129.7, 129.2, 129.0, 128.6 (q,  $J = 310.3$  Hz), 127.6, 121.7, 105.4, 34.9, 21.9;  $^{19}\text{F}$  NMR (378 MHz,  $\text{CDCl}_3$ )  $\delta$  -43.06; HRMS (ESI) calcd for  $\text{C}_{17}\text{H}_{13}\text{ClF}_3\text{NO}_2\text{S}_2\text{Na}^+$ : 441.9921  $[\text{M} + \text{Na}^+]$ , found: 441.9906.

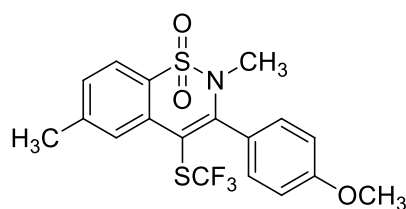

3-(4-Methoxyphenyl)-2,6-dimethyl-4-((trifluoromethyl)thio)-2*H*-benzo[*e*][1,2]thiazine

1,1-dioxide (**3c**):  $^1\text{H}$  NMR (400 MHz,  $\text{CDCl}_3$ )  $\delta$  8.00 (s, 1H), 7.81 (d,  $J = 8.0$  Hz, 1H), 7.39-7.37 (m, 1H), 7.34 (d,  $J = 8.4$  Hz, 2H), 7.01 (d,  $J = 8.8$  Hz, 2H), 3.89 (s, 3H), 3.02 (s, 3H), 2.53 (s, 3H);  $^{13}\text{C}$  NMR (100 MHz,  $\text{CDCl}_3$ )  $\delta$  161.1, 153.5, 142.9, 134.5, 131.5, 129.3, 129.1, 128.8 (q,  $J = 310.3$  Hz), 127.6, 126.0, 121.6, 114.0, 104.4, 55.4, 35.1, 21.9;  $^{19}\text{F}$  NMR (378 MHz,  $\text{CDCl}_3$ )  $\delta$  -43.25; HRMS (ESI) calcd for  $\text{C}_{18}\text{H}_{16}\text{F}_3\text{NO}_3\text{S}_2\text{Na}^+$ : 438.0416  $[\text{M} + \text{Na}^+]$ , found: 438.0413.

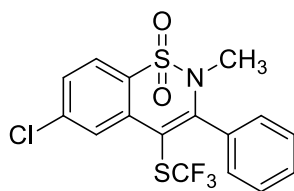

6-Chloro-2-methyl-3-phenyl-4-((trifluoromethyl)thio)-2*H*-benzo[*e*][1,2]thiazine

1,1-dioxide (**3d**):  $^1\text{H}$  NMR (400 MHz,  $\text{CDCl}_3$ )  $\delta$  8.20 (d,  $J = 1.6$  Hz, 1H), 7.87 (d,  $J = 8.4$  Hz, 1H), 7.56-7.52 (m, 4H), 7.40-7.38 (m, 2H), 3.05 (s, 3H).  $^{13}\text{C}$  NMR (100 MHz,  $\text{CDCl}_3$ )  $\delta$  154.8, 138.9, 136.1, 133.4, 130.6, 129.6, 128.8, 128.7, 128.6 (q,  $J = 310.9$  Hz), 127.8, 127.1, 123.2, 111.0, 103.7, 35.0;  $^{19}\text{F}$  NMR (378 MHz,  $\text{CDCl}_3$ )  $\delta$  -43.22; HRMS (ESI) calcd for  $\text{C}_{16}\text{H}_{11}\text{ClF}_3\text{NO}_2\text{S}_2\text{Na}^+$ : 427.9764 [ $\text{M} + \text{Na}^+$ ], found: 427.9746.

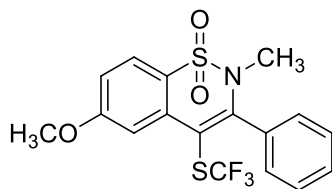

6-Methoxy-2-methyl-3-phenyl-4-((trifluoromethyl)thio)-2*H*-benzo[*e*][1,2]thiazine

1,1-dioxide (**3e**):  $^1\text{H}$  NMR (400 MHz,  $\text{CDCl}_3$ )  $\delta$  8.86 (d,  $J = 8.8$  Hz, 1H), 7.66 (d,  $J = 1.6$  Hz, 1H), 7.53-7.50 (m, 3H), 7.40-7.38 (m, 2H), 7.11-7.08 (m, 1H), 3.94 (s, 3H), 3.03 (s, 3H);  $^{13}\text{C}$  NMR (100 MHz,  $\text{CDCl}_3$ )  $\delta$  162.6, 154.1, 136.4, 133.9, 130.3, 129.5, 128.8 (q,  $J = 300.7$  Hz), 128.7, 123.7, 115.4, 111.1, 104.1, 55.8, 34.6;  $^{19}\text{F}$  NMR (378 MHz,  $\text{CDCl}_3$ )  $\delta$  -43.12; HRMS (ESI) calcd for  $\text{C}_{17}\text{H}_{15}\text{F}_3\text{NO}_3\text{S}_2^+$ : 402.0440 [ $\text{M} + \text{H}^+$ ], found: 402.0425.

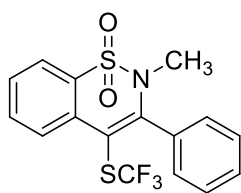

2-Methyl-3-phenyl-4-((trifluoromethyl)thio)-2*H*-benzo[*e*][1,2]thiazine 1,1-dioxide

(**3f**):  $^1\text{H}$  NMR (400 MHz,  $\text{CDCl}_3$ )  $\delta$  8.22 (d,  $J = 8.4$  Hz, 1H), 7.94 (d,  $J = 7.6$  Hz, 1H), 7.75-7.72 (m, 1H), 7.59 (t,  $J = 7.6$  Hz, 1H), 7.53-7.50 (m, 3H), 7.42-7.40 (m, 2H), 3.04 (s, 3H);  $^{13}\text{C}$  NMR (100 MHz,  $\text{CDCl}_3$ )  $\delta$  153.4, 134.3, 133.7, 1132.2, 131.5, 130.3, 129.7, 129.2 (q,  $J = 303.8$  Hz), 128.7, 128.5, 127.4, 124.7, 121.6, 104.9, 34.9;  $^{19}\text{F}$  NMR (378 MHz,  $\text{CDCl}_3$ )  $\delta$  -43.10; HRMS (ESI) calcd for  $\text{C}_{16}\text{H}_{13}\text{F}_3\text{NO}_2\text{S}_2^+$ : 372.0334 [ $\text{M} + \text{H}^+$ ], found: 372.0329.

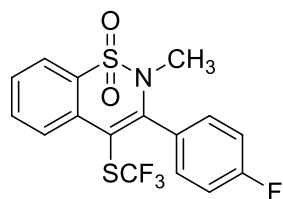

3-(4-Fluorophenyl)-2-methyl-4-((trifluoromethyl)thio)-2*H*-benzo[*e*][1,2]thiazine

1,1-dioxide (**3g**):  $^1\text{H}$  NMR (400 MHz,  $\text{CDCl}_3$ )  $\delta$  8.21 (d,  $J = 8.0$  Hz, 1H), 7.94 (d,  $J = 8.0$  Hz, 1H), 7.76-7.72 (m, 1H), 7.62-7.59 (m, 1H), 7.44-7.40 (m, 2H), 7.21 (t,  $J = 8.4$  Hz, 2H), 3.04 (s, 3H);  $^{13}\text{C}$  NMR (100 MHz,  $\text{CDCl}_3$ )  $\delta$  163.7 (d,  $J = 250$  Hz), 159.9, 152.4, 134.1, 132.3, 131.8 (d,  $J = 8.5$  Hz), 131.6, 129.7, 128.7, 128.6 (q,  $J = 310.1$  Hz), 127.5, 121.6, 115.9 (d,  $J = 22$  Hz), 105.5, 35.0;  $^{19}\text{F}$  NMR (378 MHz,  $\text{CDCl}_3$ )  $\delta$  -43.07, -109.41; HRMS (ESI) calcd for  $\text{C}_{16}\text{H}_{12}\text{F}_4\text{NO}_2\text{S}_2^+$ : 390.0240  $[\text{M} + \text{H}^+]$ , found: 390.0242.

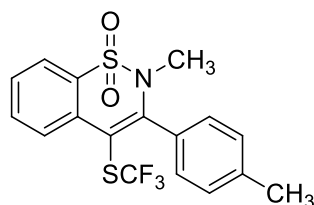

2-Methyl-3-(*p*-tolyl)-4-((trifluoromethyl)thio)-2*H*-benzo[*e*][1,2]thiazine 1,1-dioxide (**3h**):  $^1\text{H}$  NMR (400 MHz,  $\text{CDCl}_3$ )  $\delta$  8.21 (d,  $J = 8.0$  Hz, 1H), 7.95-7.93 (m, 2H), 7.74-7.70 (m, 1H), 7.60-7.58 (m, 1H), 7.33- (d,  $J = 8.0$  Hz, 1H), 7.56 (t,  $J = 8.0$  Hz, 1H), 7.49 (d,  $J = 8.0$  Hz, 1H) 7.33-7.29 (m, 4H), 3.04 (s, 3H), 2.46 (s, 3H);  $^{13}\text{C}$  NMR (100 MHz,  $\text{CDCl}_3$ )  $\delta$  153.6, 140.7, 134.4, 132.2, 131.5, 130.8, 129.4, 128.8 (q,  $J = 310.5$  Hz), 128.4, 127.4, 121.5, 104.6, 35.0, 21.5;  $^{19}\text{F}$  NMR (378 MHz,  $\text{CDCl}_3$ )  $\delta$  -43.14; HRMS (ESI) calcd for  $\text{C}_{17}\text{H}_{15}\text{F}_3\text{NO}_2\text{S}_2^+$ : 386.0491  $[\text{M} + \text{H}^+]$ , found: 386.0482.

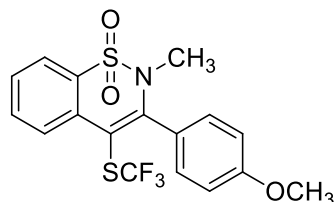

3-(4-Methoxyphenyl)-2-methyl-4-((trifluoromethyl)thio)-2*H*-benzo[*e*][1,2]thiazine

1,1-dioxide (**3i**):  $^1\text{H}$  NMR (400 MHz,  $\text{CDCl}_3$ )  $\delta$  8.21 ((d,  $J = 8.4$  Hz, 1H), 7.94-7.92 (m, 1H), 7.74-7.70 (m, 1H), 7.60-7.55 (m, 1H), 7.37-7.33 (m, 2H), 7.04-7.00 (m, 2H), 3.89 (s, 3H), 3.04 (s, 3H);  $^{13}\text{C}$  NMR (100 MHz,  $\text{CDCl}_3$ )  $\delta$  161.2, 153.4, 134.5, 132.2,

131.8, 131.5, 128.8 (q,  $J = 310.6$  Hz), 128.4, 127.5, 125.8, 121.6, 114.0, 104.6, 55.4, 35.2.  $^{19}\text{F}$  NMR (378 MHz,  $\text{CDCl}_3$ )  $\delta$  -42. HRMS (ESI) calcd for  $\text{C}_{17}\text{H}_{14}\text{F}_3\text{NO}_2\text{S}_2\text{Na}^+$ : 424.0259  $[\text{M} + \text{Na}^+]$ , found: 424.0243.

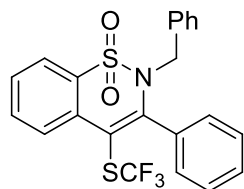

2-Benzyl-3-phenyl-4-((trifluoromethyl)thio)-2H-benzo[e][1,2]thiazine 1,1-dioxide (**3j**):  $^1\text{H}$  NMR (400 MHz,  $\text{CDCl}_3$ )  $\delta$  8.16 (d,  $J = 8.0$  Hz, 1H), 7.97 (d,  $J = 7.6$  Hz, 1H), 7.71 (t,  $J = 8.0$  Hz, 1H), 7.60 (t,  $J = 7.6$  Hz, 1H), 7.49 (t,  $J = 7.2$  Hz, 1H), 7.42 (t,  $J = 7.2$  Hz, 2H), 7.25 (t,  $J = 7.2$  Hz, 2H), 7.09 (t,  $J = 7.2$  Hz, 1H), 7.02 (t,  $J = 7.2$  Hz, 2H), 6.59 (d,  $J = 7.2$  Hz, 2H), 4.73 (s, 2H);  $^{13}\text{C}$  NMR (100 MHz,  $\text{CDCl}_3$ )  $\delta$  152.4, 135.5, 134.1, 133.2, 132.9, 132.2, 130.3, 128.8, 128.7 (q,  $J = 310.6$  Hz), 128.3, 127.7, 127.3, 121.5, 108.0, 51.6, 29.7;  $^{19}\text{F}$  NMR (378 MHz,  $\text{CDCl}_3$ )  $\delta$  -42.77; HRMS (ESI) calcd for  $\text{C}_{22}\text{H}_{17}\text{F}_3\text{NO}_2\text{S}_2^+$ : 448.0647  $[\text{M} + \text{H}^+]$ , found: 448.0623.

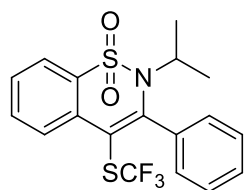

2-Isopropyl-3-phenyl-4-((trifluoromethyl)thio)-2H-benzo[e][1,2]thiazine 1,1-dioxide (**3k**):  $^1\text{H}$  NMR (400 MHz,  $\text{CDCl}_3$ )  $\delta$  8.19 (d,  $J = 8.0$  Hz, 1H), 7.93-7.91 (m, 1H), 7.74-7.70 (m, 1H), 7.61-7.57 (m, 1H), 7.55-7.48 (m, 5H), 3.91-3.84 (m, 1H), 1.13 (d,  $J = 6.8$  Hz, 6H);  $^{13}\text{C}$  NMR (100 MHz,  $\text{CDCl}_3$ )  $\delta$  153.1, 134.8, 133.0, 131.9, 130.6, 130.4, 129.9, 129.1 (q,  $J = 304.2$  Hz), 128.9, 128.2, 127.8, 121.5, 126.1, 109.4, 56.6, 25.8, 25.7;  $^{19}\text{F}$  NMR (378 MHz,  $\text{CDCl}_3$ )  $\delta$  -42.40; HRMS (ESI) calcd for  $\text{C}_{18}\text{H}_{16}\text{F}_3\text{NO}_2\text{S}_2\text{Na}^+$ : 422.0467  $[\text{M} + \text{Na}^+]$ , found: 422.0453.

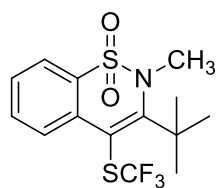

3-(*tert*-Butyl)-2-methyl-4-((trifluoromethyl)thio)-2H-benzo[e][1,2]thiazine 1,1-dioxide (**3l**):  $^1\text{H}$  NMR (400 MHz,  $\text{CDCl}_3$ )  $\delta$  8.12 (d,  $J = 8.0$  Hz, 1H), 7.85 (d,  $J =$

7.6 Hz, 1H), 7.70-7.66 (m, 1H), 7.52-7.48 (m, 1H), 3.03 (s, 3H), 1.50 (s, 1H);  $^{13}\text{C}$  NMR (100 MHz,  $\text{CDCl}_3$ )  $\delta$  171.1, 135.5, 132.8, 130.6, 128.7, 128.6 (q,  $J = 309.3$  Hz), 127.2, 123.8, 103.3, 40.2, 29.9, 29.7;  $^{19}\text{F}$  NMR (378 MHz,  $\text{CDCl}_3$ )  $\delta$  -41.90; HRMS (ESI) calcd for  $\text{C}_{14}\text{H}_{16}\text{F}_3\text{NO}_2\text{S}_2\text{Na}^+$ : 374.0467  $[\text{M} + \text{Na}^+]$ , found: 374.0453.

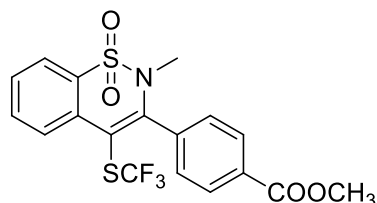

Methyl-4-(2-methyl-1,1-dioxido-4-((trifluoromethyl)thio)-2H-benzo[e][1,2]thiazin-3-yl)benzoate (**3m**):  $^1\text{H}$  NMR (400 MHz,  $\text{CDCl}_3$ )  $\delta$  8.20 (t,  $J = 8.4$  Hz, 3H), 7.96-7.94 (m, 1H), 7.77-7.73 (m, 1H), 7.64-7.60 (m, 1H), 7.51 (d,  $J = 8.4$  Hz, 2H), 3.97 (s, 3H), 3.03 (s, 3H);  $^{13}\text{C}$  NMR (100 MHz,  $\text{CDCl}_3$ )  $\delta$  166.2, 152.2, 137.8, 133.9, 132.4, 131.8, 129.9, 129.0 (q,  $J = 310.2$  Hz), 128.9, 127.4, 121.7, 105.7, 52.5, 34.9.  $^{19}\text{F}$  NMR (378 MHz,  $\text{CDCl}_3$ )  $\delta$  -42.97; HRMS (ESI) calcd for  $\text{C}_{18}\text{H}_{14}\text{F}_3\text{NO}_2\text{S}_2$ : 429.0316  $[\text{M}^+]$ , found: 429.0313.

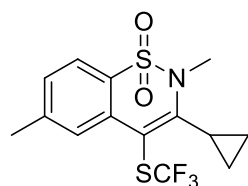

3-Cyclopropyl-2,6-dimethyl-4-((trifluoromethyl)thio)-2H-benzo[e][1,2]thiazine 1,1-dioxide (**3n**):  $^1\text{H}$  NMR (400 MHz,  $\text{CDCl}_3$ )  $\delta$  7.88 (s, 1H), 7.73 (d,  $J = 8.0$  Hz, 1H), 7.35-7.33 (m, 1H), 3.07 (s, 3H), 2.50 (s, 3H), 2.26-2.22 (m, 1H), 1.22-1.18 (m, 2H), 1.10-1.06 (m, 2H);  $^{13}\text{C}$  NMR (100 MHz,  $\text{CDCl}_3$ )  $\delta$  157.5, 143.2, 133.6, 129.4, 129.3 (q,  $J = 310.0$  Hz), 129.2, 127.4, 122.9, 111.0, 35.7, 21.9, 15.0, 9.2.  $^{19}\text{F}$  NMR (378 MHz,  $\text{CDCl}_3$ )  $\delta$  -42.32; HRMS (ESI) calcd for  $\text{C}_{14}\text{H}_{14}\text{F}_3\text{NO}_2\text{S}_2$ : 349.0418  $[\text{M}^+]$ , found: 349.0417.

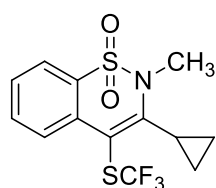

3-Cyclopropyl-2-methyl-4-((trifluoromethyl)thio)-2H-benzo[e][1,2]thiazine 1,1-dioxide (**3o**):  $^1\text{H}$  NMR (400 MHz,  $\text{CDCl}_3$ )  $\delta$  8.09 (d,  $J = 8.0$  Hz, 1H), 7.89-7.85

(m, 1H), 7.70-7.66 (m, 1H), 7.56-7.52 (m, 1H), 3.10 (s, 3H), 2.27-2.20 (m, 1H), 1.24-1.19 (m, 2H), 1.11-1.07 (m, 2H);  $^{13}\text{C}$  NMR (100 MHz,  $\text{CDCl}_3$ )  $\delta$  157.4, 133.6, 132.4, 131.7, 129.2 (q,  $J = 310.2$  Hz), 128.6, 127.2, 122.8, 111.0, 35.7, 29.7, 15.0, 9.3;  $^{19}\text{F}$  NMR (378 MHz,  $\text{CDCl}_3$ )  $\delta$  -41.30; HRMS (ESI) calcd for  $\text{C}_{13}\text{H}_{13}\text{F}_3\text{NO}_2\text{S}_2^+$ : 336.0334  $[\text{M} + \text{H}^+]$ , found: 336.0319.

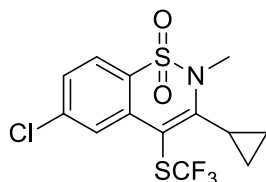

6-Chloro-3-cyclopropyl-2-methyl-4-((trifluoromethyl)thio)-2H-benzo[e][1,2]thiazine 1,1-dioxide (**3p**):  $^1\text{H}$  NMR (400 MHz,  $\text{CDCl}_3$ )  $\delta$  8.07 (d,  $J = 1.6$  Hz, 1H), 7.78 (d,  $J = 8.4$  Hz, 1H), 7.51- 7.49 (m, 1H), 3.12 (s, 3H), 2.50-2.19 (m, 1H), 1.27-1.22 (m, 2H), 1.11-1.07 (m, 2H);  $^{13}\text{C}$  NMR (100 MHz,  $\text{CDCl}_3$ )  $\delta$  158.8, 139.0, 135.5, 129.9, 129.1 (q,  $J = 310.3$  Hz), 128.7, 127.0, 124.4, 109.8, 35.7, 15.3, 9.6.  $^{19}\text{F}$  NMR (378 MHz,  $\text{CDCl}_3$ )  $\delta$  -41.32; HRMS (ESI) calcd for  $\text{C}_{13}\text{H}_{11}\text{F}_3\text{NO}_2\text{S}_2$ : 368.9872  $[\text{M}^+]$ , found: 368.9873.

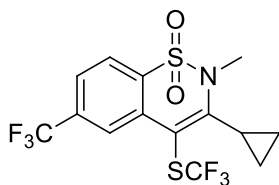

3-cyclopropyl-2-methyl-6-(trifluoromethyl)-4-((trifluoromethyl)thio)-2H-benzo[e][1,2]thiazine 1,1-dioxide (**3q**):  $^1\text{H}$  NMR (400 MHz,  $\text{CDCl}_3$ )  $\delta$  8.37 (s, 1H), 7.98 (d,  $J = 8.0$  Hz, 1H), 7.79 (d,  $J = 8.0$  Hz, 1H), 3.17 (s, 3H), 2.26-2.19 (m, 1H), 1.30-1.26 (m, 2H), 1.13-1.08 (m, 2H);  $^{13}\text{C}$  NMR (100 MHz,  $\text{CDCl}_3$ )  $\delta$  158.7, 134.6, 134.4 (q,  $J = 35.5$  Hz), 129.0 (q,  $J = 310.7$  Hz), 125.2, 125.1, 124.4, 124.3, 123.2 (q,  $J = 271.3$  Hz), 35.7, 15.2, 9.8.  $^{19}\text{F}$  NMR (378 MHz,  $\text{CDCl}_3$ )  $\delta$  -41.37, -63.51; HRMS (ESI) calcd for  $\text{C}_{14}\text{H}_{11}\text{F}_6\text{NO}_2\text{S}_2$ : 403.0135  $[\text{M}^+]$ , found: 403.0139.

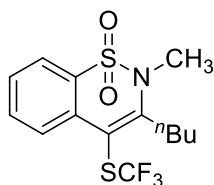

3-Butyl-2-methyl-4-((trifluoromethyl)thio)-2H-benzo[e][1,2]thiazine 1,1-dioxide (**3r**):



$^1\text{H}$  NMR (400 MHz,  $\text{CDCl}_3$ )  $\delta$  8.12 (d,  $J = 8.0$  Hz, 1H), 7.86 (d,  $J = 6.8$  Hz, 1H), 7.69-7.65 (m, 1H), 7.51 (t,  $J = 7.6$  Hz, 1H), 3.39 (s, 3H), 3.04-3.00 (m, 2H), 1.71-1.64 (m, 2H), 1.55-1.47 (m, 2H), 1.00 (t,  $J = 7.6$  Hz, 3H);  $^{13}\text{C}$  NMR (100 MHz,  $\text{CDCl}_3$ )  $\delta$  155.3, 133.9, 132.1, 131.2, 129.0 (q,  $J = 310.7$  Hz), 127.9, 127.0, 121.4, 104.0, 40.2, 29.9, 29.7;  $^{19}\text{F}$  NMR (378 MHz,  $\text{CDCl}_3$ )  $\delta$  -42.68; HRMS (ESI) calcd for  $\text{C}_{14}\text{H}_{17}\text{F}_3\text{NO}_2\text{S}_2^+$ : 352.0674 [ $\text{M} + \text{H}^+$ ], found: 352.0647.

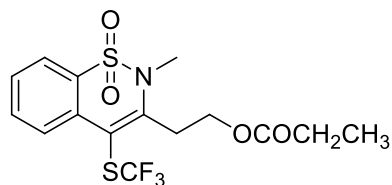

2-(2-Methyl-1,1-dioxido-4-((trifluoromethyl)thio)-2H-benzo[*e*][1,2]thiazin-3-yl)ethyl propionate (**3s**):  $^1\text{H}$  NMR (400 MHz,  $\text{CDCl}_3$ )  $\delta$  8.02 (d,  $J = 8.0$  Hz, 1H), 7.89 (d,  $J = 7.6$  Hz, 1H), 7.74-7.70 (m, 1H), 7.55 (t,  $J = 7.6$  Hz, 1H), 4.48-4.37 (m, 2H), 3.33-3.24 (m, 2H), 3.03 (s, 3H), 2.33 (q,  $J = 7.6$  Hz, 2H), 1.13 (t,  $J = 7.6$  Hz, 3H);  $^{13}\text{C}$  NMR (100 MHz,  $\text{CDCl}_3$ )  $\delta$  174.2, 163.3, 133.3, 129.9, 128.8 (q,  $J = 310.6$  Hz), 127.1, 124.5, 121.5, 109.4, 60.1, 33.1, 30.0, 27.3, 8.9.  $^{19}\text{F}$  NMR (378 MHz,  $\text{CDCl}_3$ )  $\delta$  -42.53; HRMS (ESI) calcd for  $\text{C}_{15}\text{H}_{16}\text{F}_3\text{NO}_4\text{S}_2$ : 395.0473 [ $\text{M}^+$ ], found: 395.0475.

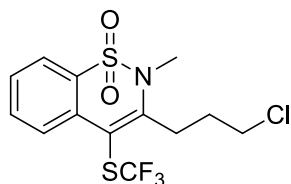

3-(3-Chloropropyl)-2-methyl-4-((trifluoromethyl)thio)-2H-benzo[*e*][1,2]thiazine 1,1-dioxide (**3t**):  $^1\text{H}$  NMR (400 MHz,  $\text{CDCl}_3$ )  $\delta$  8.02 (d,  $J = 8.0$  Hz, 1H), 7.89-7.87 (m, 1H), 7.74-7.70 (m, 1H), 7.56-7.52 (m, 1H), 3.66-3.62 (m, 2H), 3.20-3.13 (m, 1H), 3.08-3.05 (m, 1H), 3.04 (s, 3H), 2.25-2.18 (m, 2H);  $^{13}\text{C}$  NMR (100 MHz,  $\text{CDCl}_3$ )  $\delta$  163.1, 133.4, 129.0, 128.9 (q,  $J = 310.4$  Hz), 127.1, 124.5, 122.0, 105.6, 43.7, 31.0, 30.1, 29.1.  $^{19}\text{F}$  NMR (378 MHz,  $\text{CDCl}_3$ )  $\delta$  -42.55; HRMS (ESI) calcd for  $\text{C}_{13}\text{H}_{13}\text{F}_3\text{NO}_2\text{S}_2\text{Cl}$ : 371.0028 [ $\text{M}^+$ ], found: 371.0025.

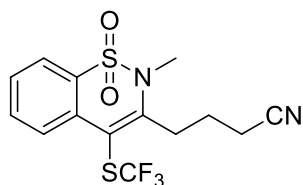

4-(2-Methyl-1,1-dioxido-4-((trifluoromethyl)thio)-2H-benzo[e][1,2]thiazin-3-yl)butanenitrile (**3u**):  $^1\text{H}$  NMR (400 MHz,  $\text{CDCl}_3$ )  $\delta$  8.03 (d,  $J$  = 8.0 Hz, 1H), 7.90-7.88 (m, 1H), 7.75-7.71 (m, 1H), 7.57-7.52 (m, 1H), 3.25-3.18 (m, 1H), 3.05 (s, 3H), 3.02-2.95 (m, 1H), 2.56-2.46 (m, 2H), 2.16-2.09 (m, 2H);  $^{13}\text{C}$  NMR (100 MHz,  $\text{CDCl}_3$ )  $\delta$  164.6, 133.5, 133.3, 129.2, 128.8 (q,  $J$  = 309.6 Hz), 127.3, 124.7, 104.5, 32.1, 30.1, 22.4, 16.5.  $^{19}\text{F}$  NMR (378 MHz,  $\text{CDCl}_3$ )  $\delta$  -42.44; HRMS (ESI) calcd for  $\text{C}_{14}\text{H}_{13}\text{F}_3\text{NO}_2\text{S}_2$ : 362.0371 [ $\text{M}^+$ ], found: 362.0368.

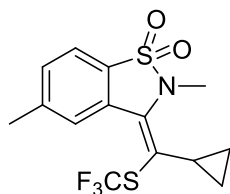

(*E*)-3-(Cyclopropyl((trifluoromethyl)thio)methylene)-2,5-dimethyl-2,3-dihydrobenzo[d]isothiazole 1,1-dioxide (**4a**):  $^1\text{H}$  NMR (400 MHz,  $\text{CDCl}_3$ )  $\delta$  7.76 (s, 1H), 7.70 (d,  $J$  = 8.0 Hz, 1H), 7.26-7.24 (m, 1H), 2.96 (s, 3H), 2.79-2.74 (m, 1H), 2.48 (s, 3H), 1.29-1.24 (m, 1H), 1.19-1.13 (m, 1H), 1.06-1.01 (m, 2H);  $^{13}\text{C}$  NMR (100 MHz,  $\text{CDCl}_3$ )  $\delta$  166.9, 144.3, 134.4, 129.3 (q,  $J$  = 310.0 Hz), 128.8, 127.2, 126.7, 124.4, 100.6, 30.2, 22.0, 14.2, 7.8, 7.7.  $^{19}\text{F}$  NMR (378 MHz,  $\text{CDCl}_3$ )  $\delta$  -42.98; HRMS (ESI) calcd for  $\text{C}_{14}\text{H}_{14}\text{F}_3\text{NO}_2\text{S}_2$ : 349.0418 [ $\text{M}^+$ ], found: 349.0419.

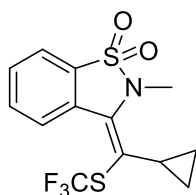

(*E*)-3-(Cyclopropyl((trifluoromethyl)thio)methylene)-2-methyl-2,3-dihydrobenzo[d]isothiazole 1,1-dioxide (**4b**):  $^1\text{H}$  NMR (400 MHz,  $\text{CDCl}_3$ )  $\delta$  7.98 (d,  $J$  = 8.0 Hz, 1H), 7.84-7.82 (m, 1H), 7.71-7.66 (m, 1H), 7.48-7.44 (m, 1H), 3.00 (s, 3H), 2.82-2.75 (m, 1H), 1.30-1.26 (m, 1H), 1.83-1.71 (m, 1H), 1.08-1.03 (m, 2H);  $^{13}\text{C}$  NMR (100 MHz,  $\text{CDCl}_3$ )  $\delta$  166.9, 133.8, 134.5, 133.3, 129.0 (q,  $J$  = 310.0 Hz), 129.9, 128.0, 126.4, 124.4, 100.8, 30.1, 14.2, 8.0, 7.8;  $^{19}\text{F}$  NMR (378 MHz,  $\text{CDCl}_3$ )  $\delta$  -42.96; HRMS (ESI)

calcd for  $C_{13}H_{13}F_3NO_2S_2^+$ : 336.0334  $[M + H^+]$ , found: 336.0322.

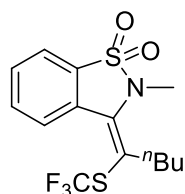

(*E*)-2-Methyl-3-(1-((trifluoromethyl)thio)pentylidene)-2,3-dihydrobenzo[*d*]isothiazole 1,1-dioxide (**4c**):  $^1H$  NMR (400 MHz,  $CDCl_3$ )  $\delta$  8.00 (d,  $J = 8.0$  Hz, 1H), 7.86 (d,  $J = 7.6$  Hz, 1H), 7.71-7.67 (m, 1H), 7.51 (t,  $J = 6.8$  Hz, 1H), 3.03 (s, 3H), 2.92-2.89 (m, 2H), 1.75-1.67 (m, 2H), 1.49-1.38 (m, 2H), 0.97 (t,  $J = 7.2$  Hz, 3H);  $^{13}C$  NMR (100 MHz,  $CDCl_3$ )  $\delta$  167.5, 133.8, 133.2, 130.1, 129.0 (q,  $J = 310.0$  Hz), 128.6, 126.9, 102.7, 33.4, 30.1, 28.6, 22.3, 13.8.  $^{19}F$  NMR (378 MHz,  $CDCl_3$ )  $\delta$  -42.67; HRMS (ESI) calcd for  $C_{14}H_{16}F_3NO_2S_2Na^+$ : 374.0467  $[M + Na^+]$ , found: 374.0461.

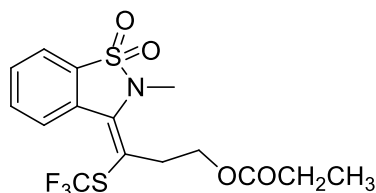

(*E*)-3-(2-Methyl-1,1-dioxidobenzo[*d*]isothiazol-3(2*H*)-ylidene)-3-((trifluoromethyl)thio)propyl propionate (**4d**):  $^1H$  NMR (400 MHz,  $CDCl_3$ )  $\delta$  8.12 (d,  $J = 8.0$  Hz, 1H), 7.89-7.87 (m, 1H), 7.72-7.67 (m, 1H), 7.58-7.54 (m, 1H), 4.36 (t,  $J = 8.0$  Hz, 2H), 3.47 (s, 3H), 3.39 (t,  $J = 7.2$  Hz, 2H), 2.36 (t,  $J = 8.0$  Hz, 2H), 1.14 (t,  $J = 8.0$  Hz, 3H);  $^{13}C$  NMR (100 MHz,  $CDCl_3$ )  $\delta$  174.2, 150.8, 134.5, 132.2, 129.3 (q,  $J = 304.3$  Hz), 128.5, 127.1, 121.1, 110.1, 61.2, 33.1, 31.7, 27.3, 8.9.  $^{19}F$  NMR (378 MHz,  $CDCl_3$ )  $\delta$  -42.51; HRMS (ESI) calcd for  $C_{15}H_{16}F_3NO_4S_2$ : 395.0473  $[M^+]$ , found: 395.0475.

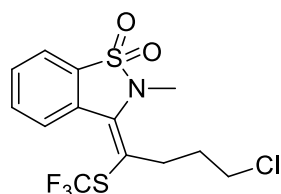

(*E*)-3-(4-Chloro-1-((trifluoromethyl)thio)butylidene)-2-methyl-2,3-dihydrobenzo[*d*]isothiazole 1,1-dioxide (**4e**):  $^1H$  NMR (400 MHz,  $CDCl_3$ )  $\delta$  8.13 (d,  $J = 8.0$  Hz, 1H), 7.88-7.86 (m, 1H), 7.70-7.66 (m, 1H), 7.56-7.52 (m, 1H), 3.70 (t,  $J = 6.0$  Hz, 2H), 3.40 (s, 3H), 3.23-3.19 (m, 2H), 2.20-2.13 (m, 2H);  $^{13}C$  NMR (100 MHz,  $CDCl_3$ )  $\delta$  153.6, 135.5, 128.9 (q,  $J = 310.0$  Hz), 128.4, 127.2, 121.5, 109.9, 106.0, 44.0, 33.0,

30.0, 29.8.  $^{19}\text{F}$  NMR (378 MHz,  $\text{CDCl}_3$ )  $\delta$  -42.39; HRMS (ESI) calcd for  $\text{C}_{14}\text{H}_{16}\text{F}_3\text{NO}_2\text{S}_2\text{Na}^+$ : 371.0028  $[\text{M}^+]$ , found: 371.0030.

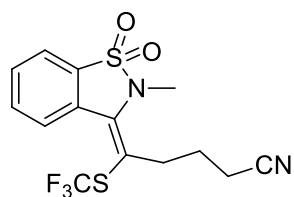

(*E*)-5-(2-Methyl-1,1-dioxidobenzo[*d*]isothiazol-3(2*H*)-ylidene)-5-((trifluoromethyl)thio)pentanenitrile (**4f**):  $^1\text{H}$  NMR (400 MHz,  $\text{CDCl}_3$ )  $\delta$  8.15 (d,  $J$  = 8.0 Hz, 1H), 7.92-7.90 (m, 1H), 7.76-7.72 (m, 1H), 7.62-7.58 (m, 1H), 3.87 (s, 3H), 3.23 (t,  $J$  = 7.2 Hz, 2H), 2.58 (t,  $J$  = 8.0 Hz, 2H), 2.15-2.07 (m, 2H);  $^{13}\text{C}$  NMR (100 MHz,  $\text{CDCl}_3$ )  $\delta$  152.8, 132.4, 131.9, 128.9, 128.8 (q,  $J$  = 310.1 Hz), 127.5, 121.7, 118.9, 105.8, 33.4, 30.9, 23.6, 16.5.  $^{19}\text{F}$  NMR (378 MHz,  $\text{CDCl}_3$ )  $\delta$  -42.07; HRMS (ESI) calcd for  $\text{C}_{14}\text{H}_{13}\text{F}_3\text{NO}_2\text{S}_2$ : 362.0371  $[\text{M}^+]$ , found: 362.0368.

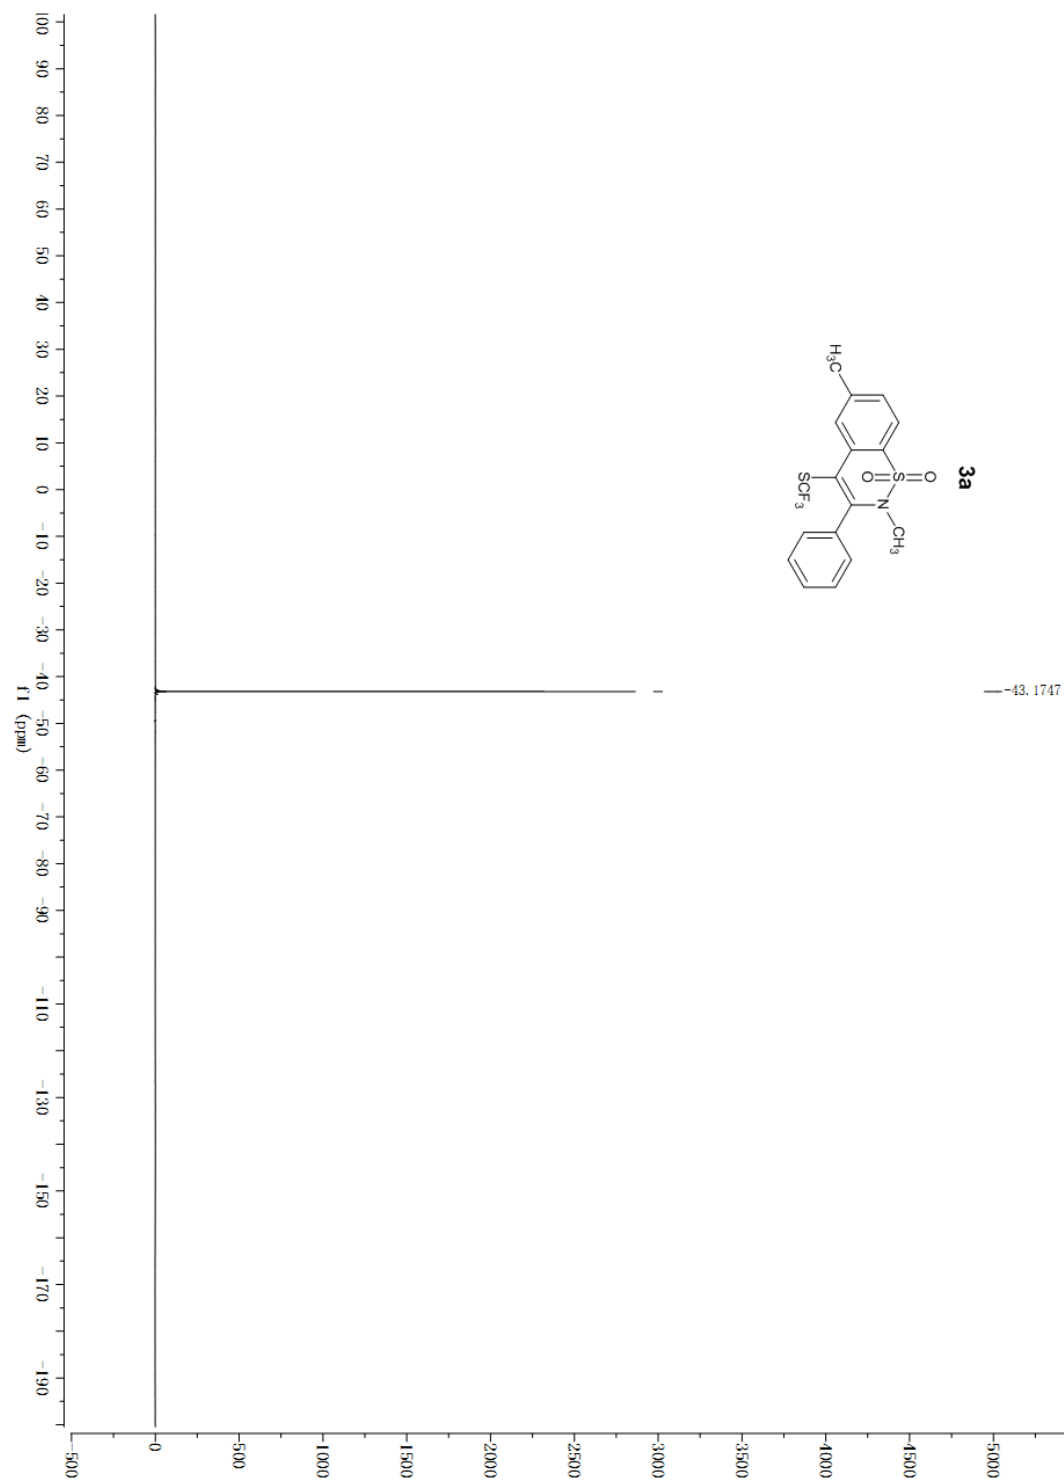

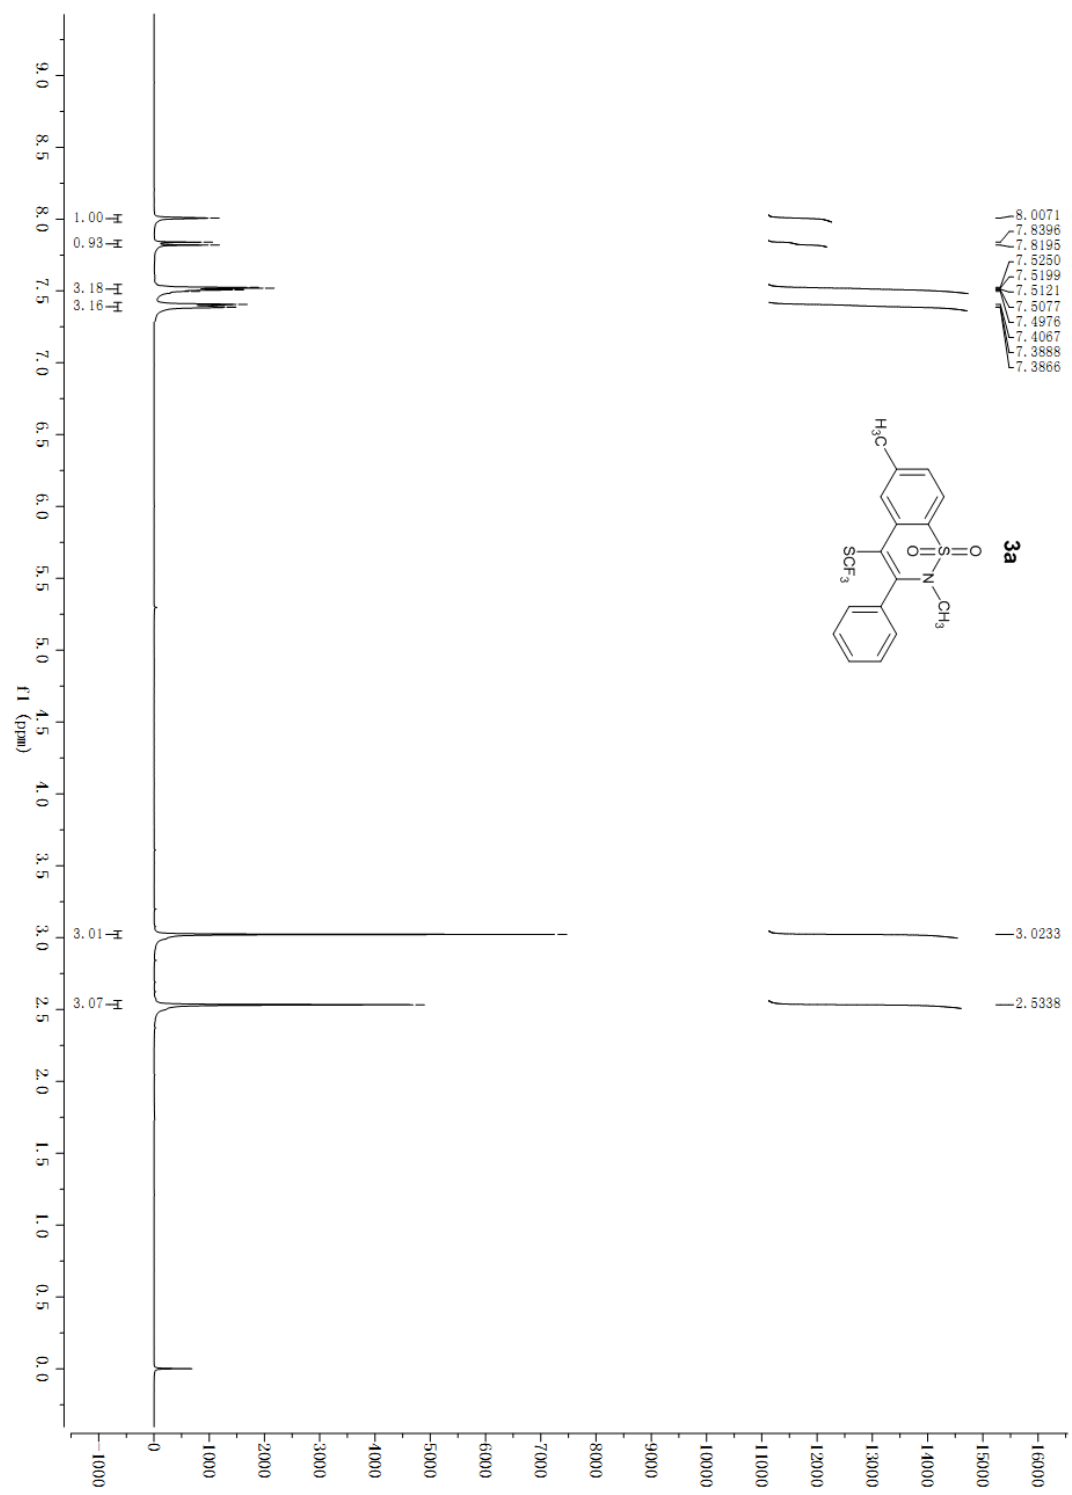

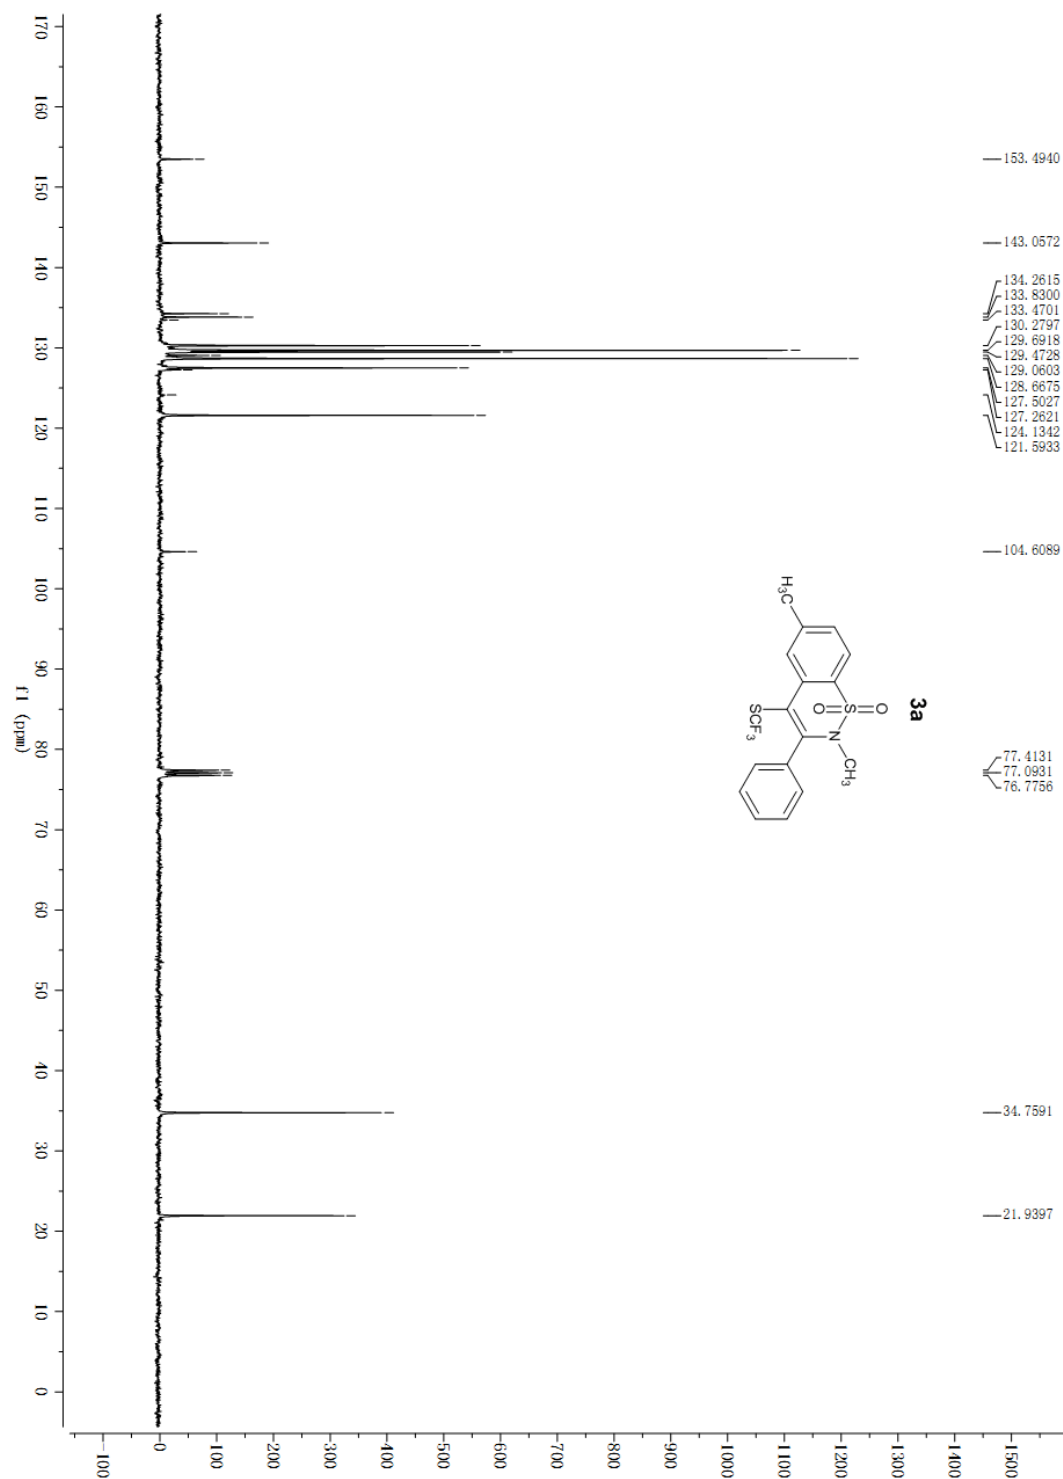

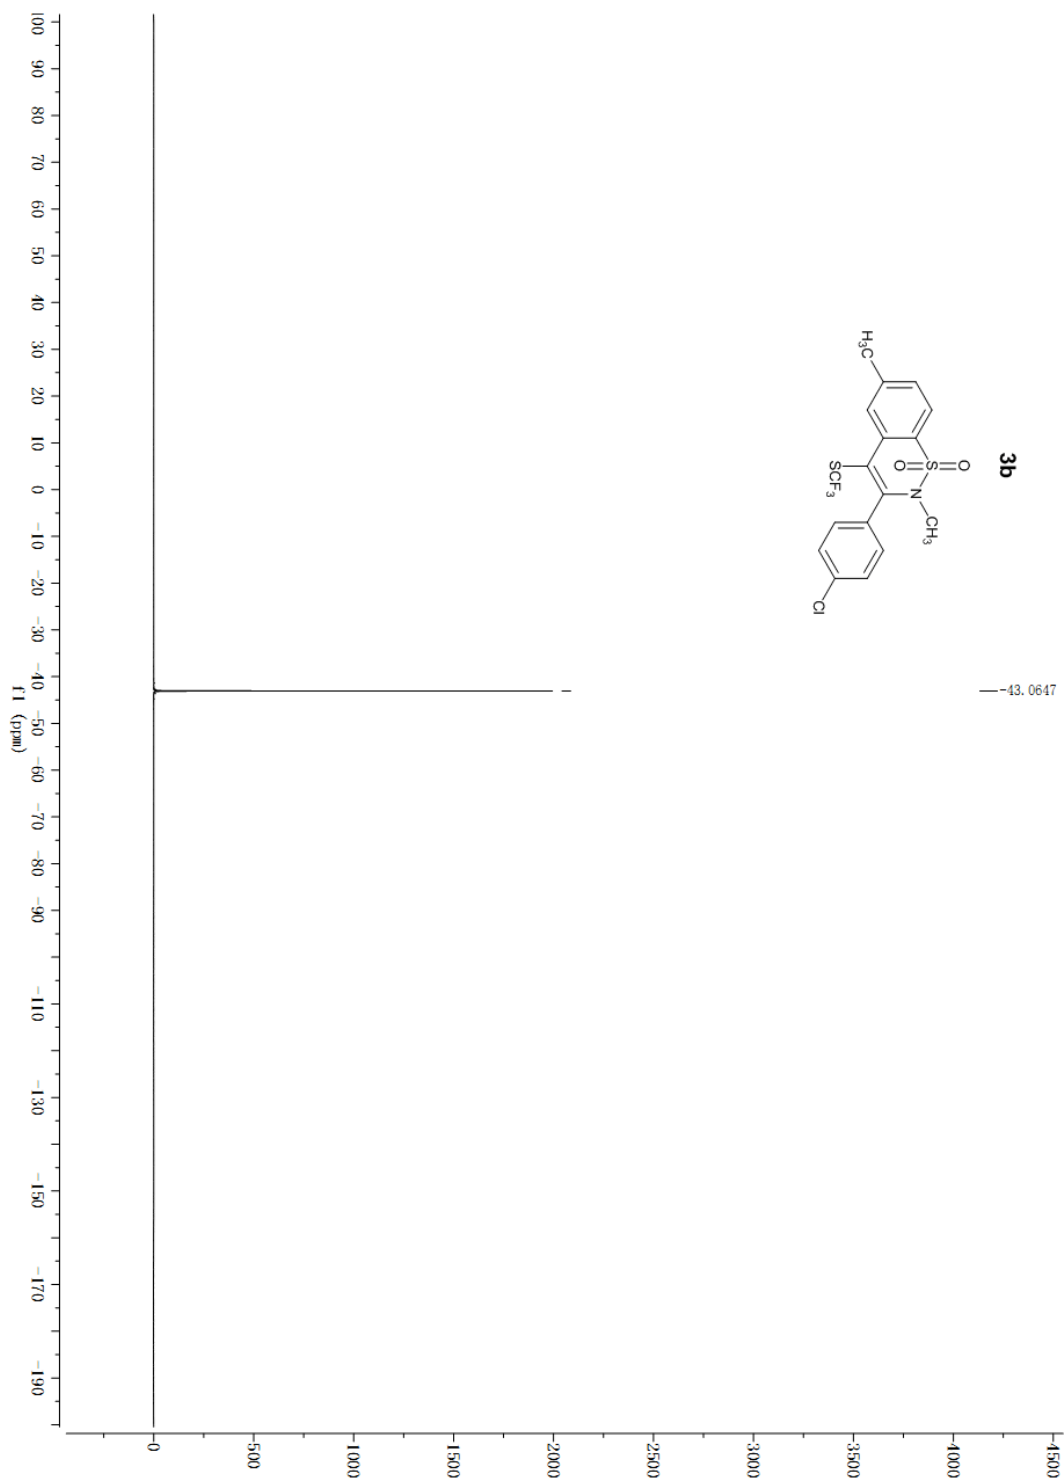



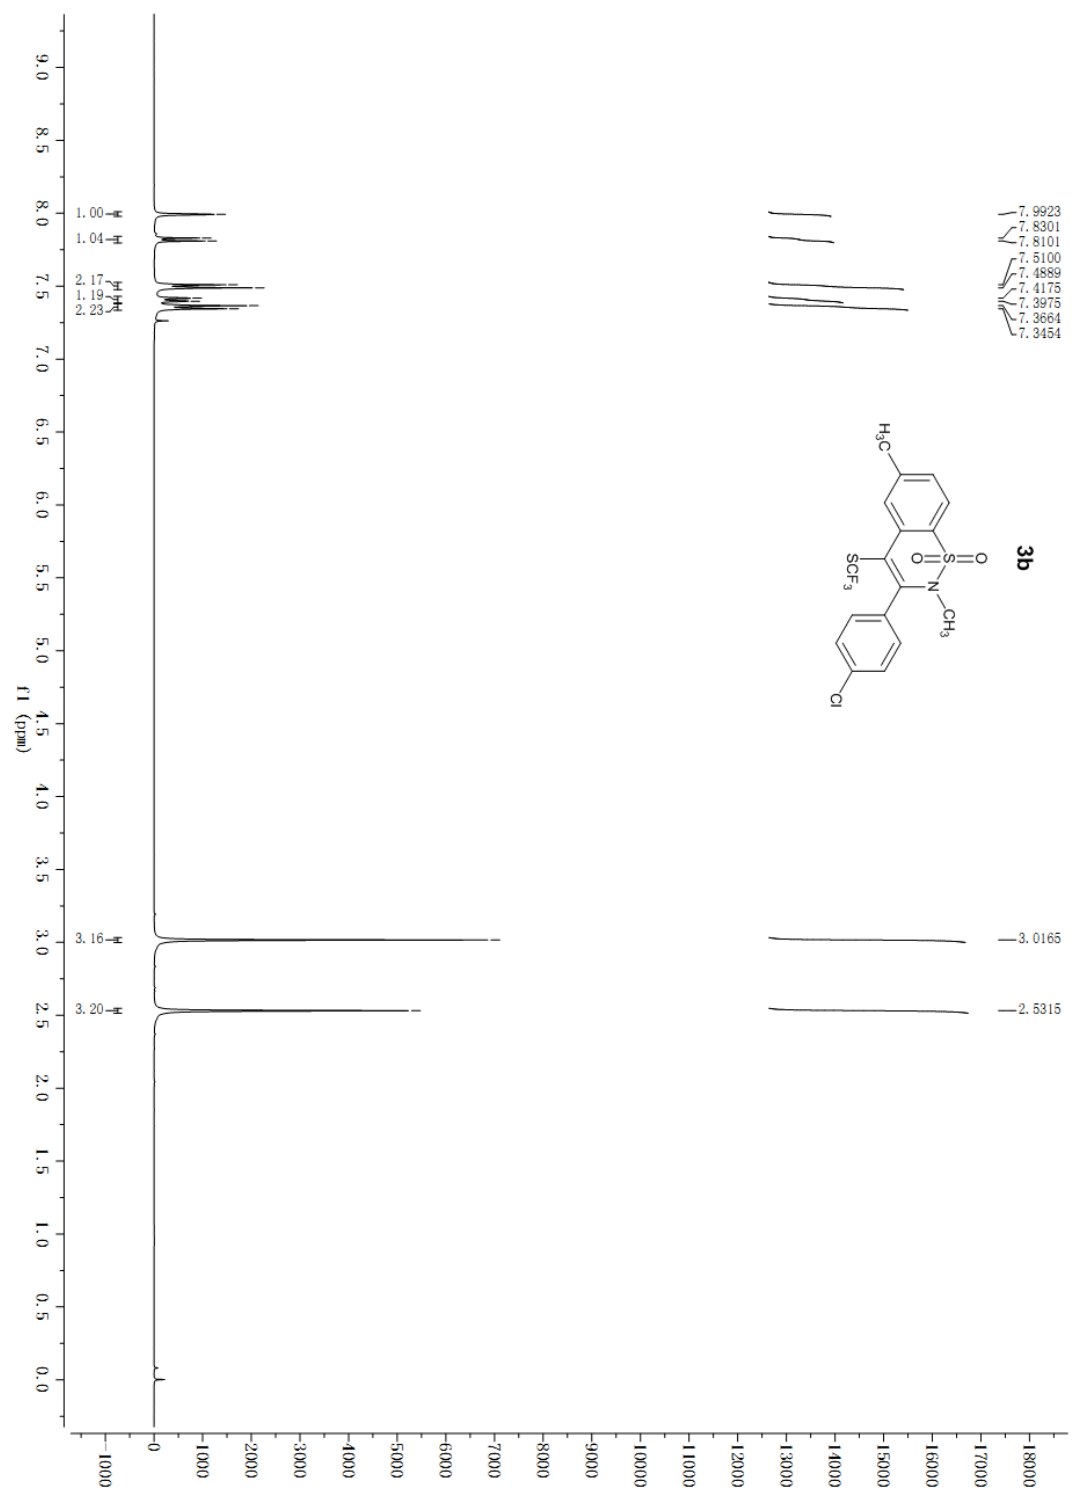

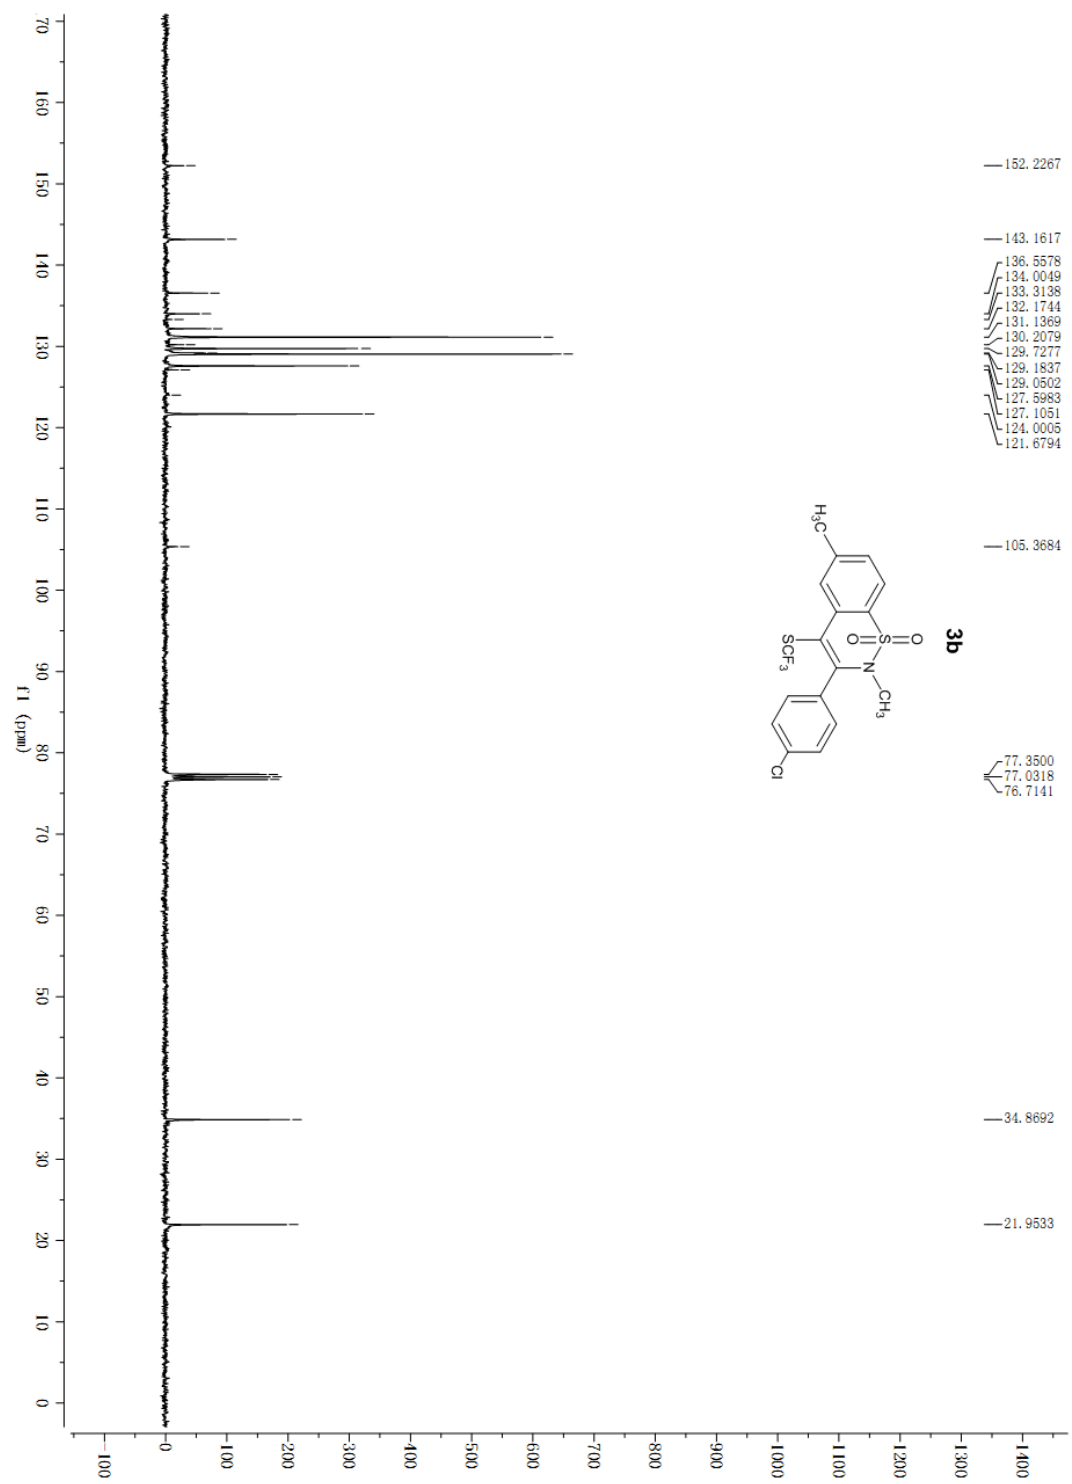

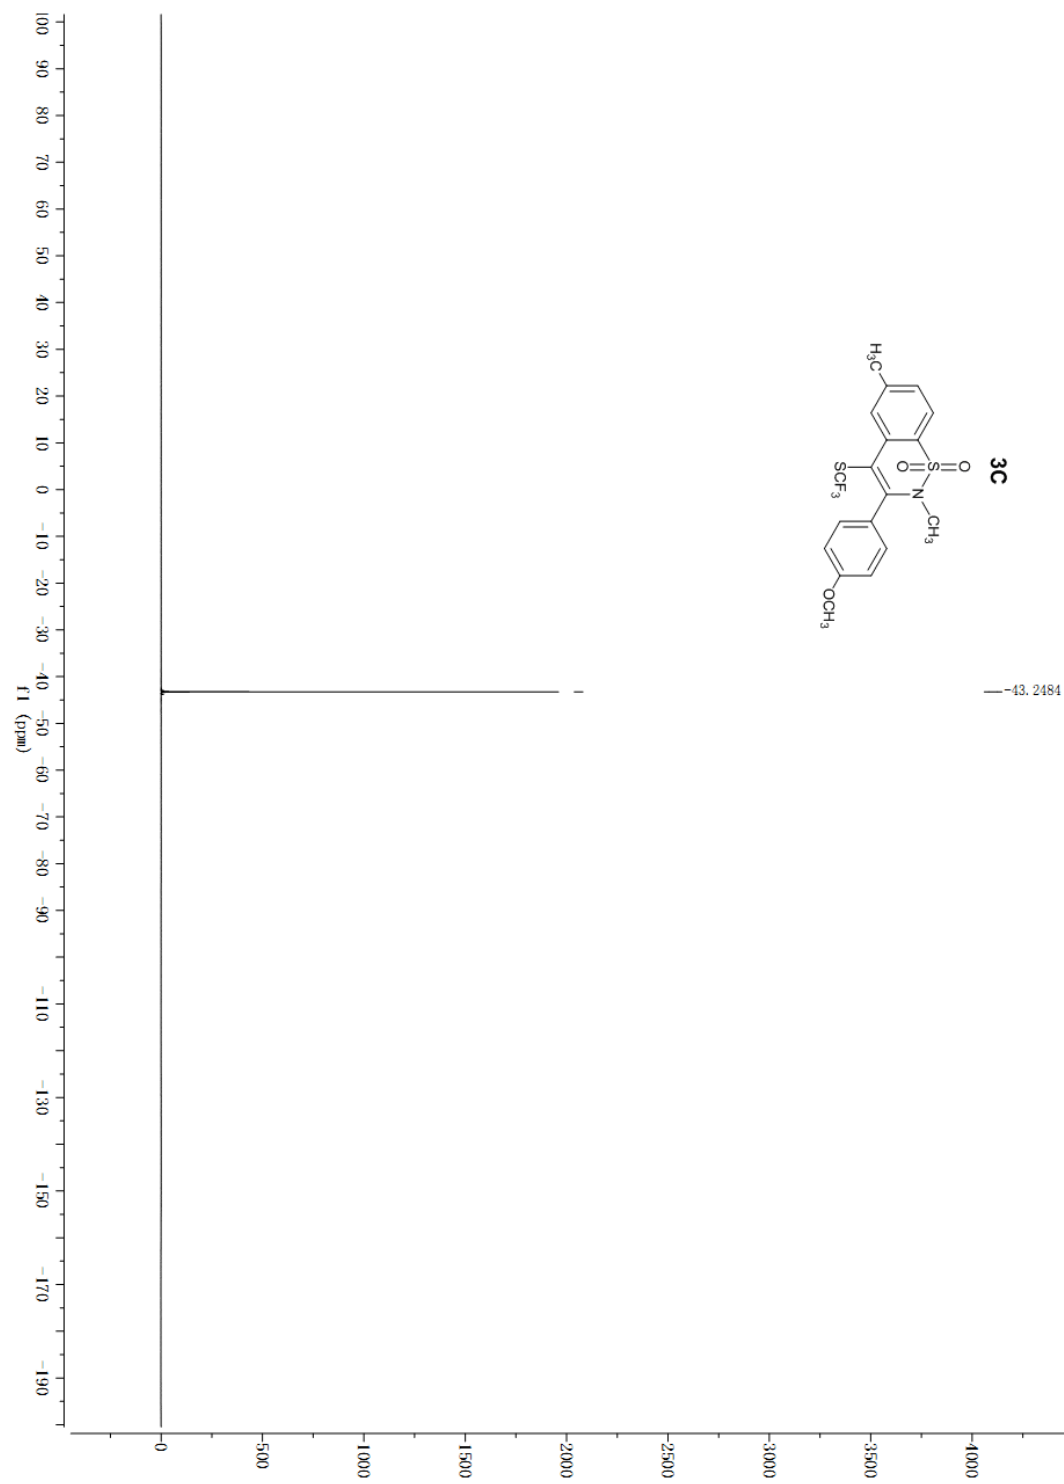

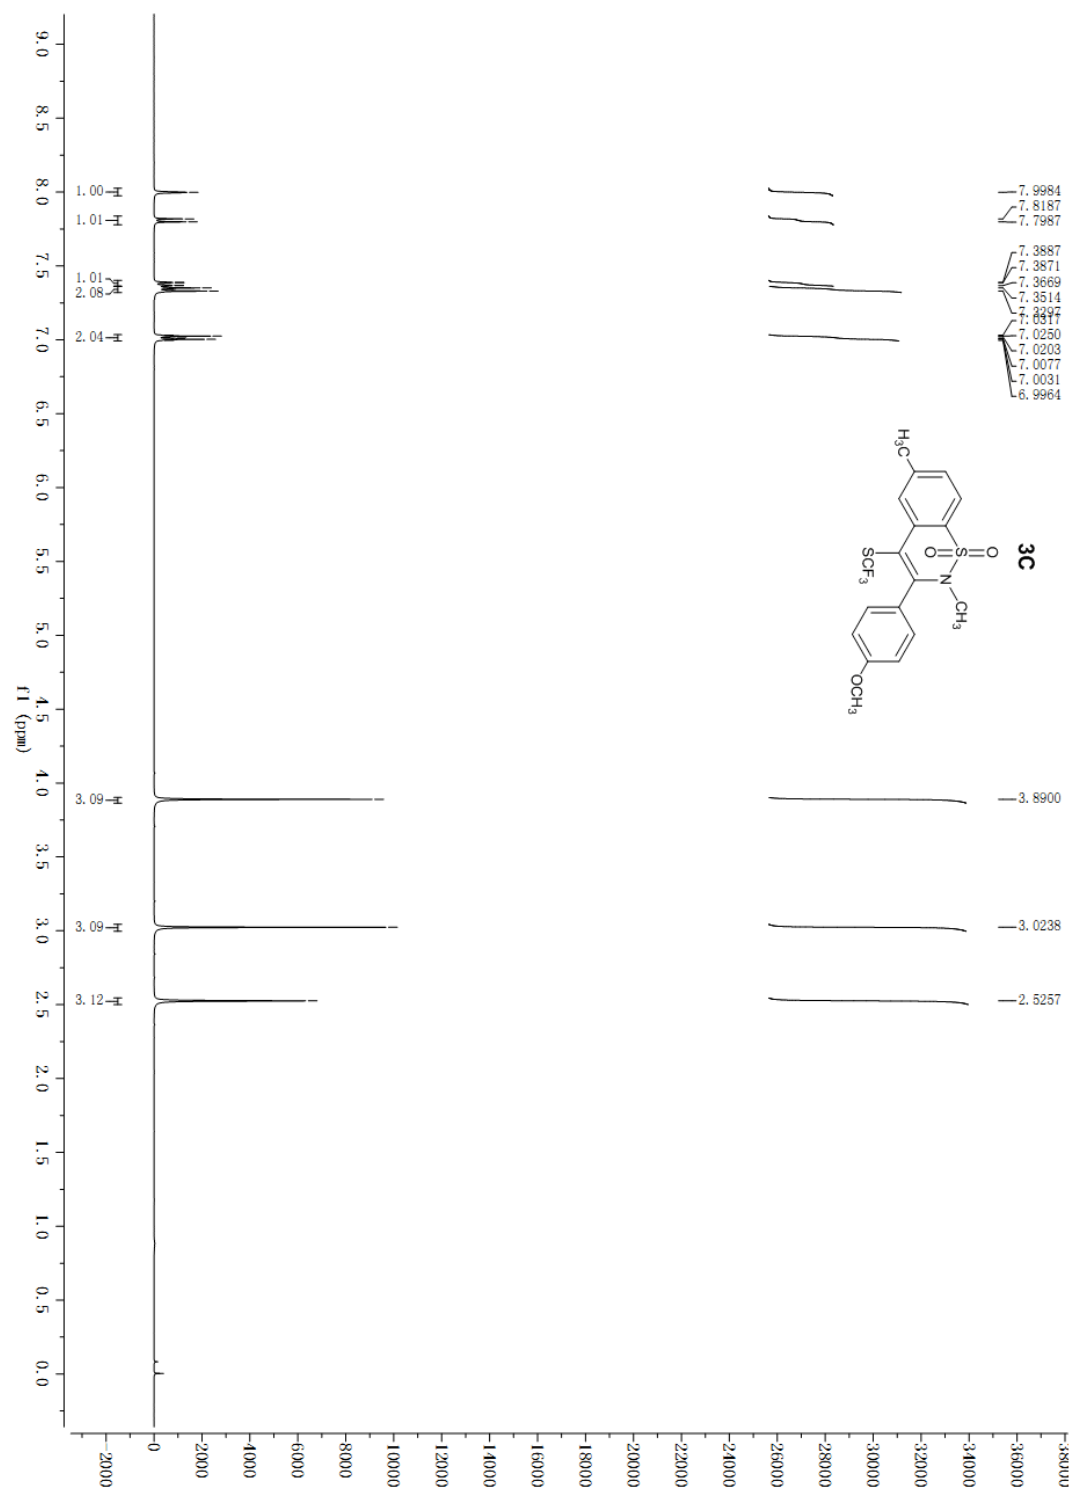

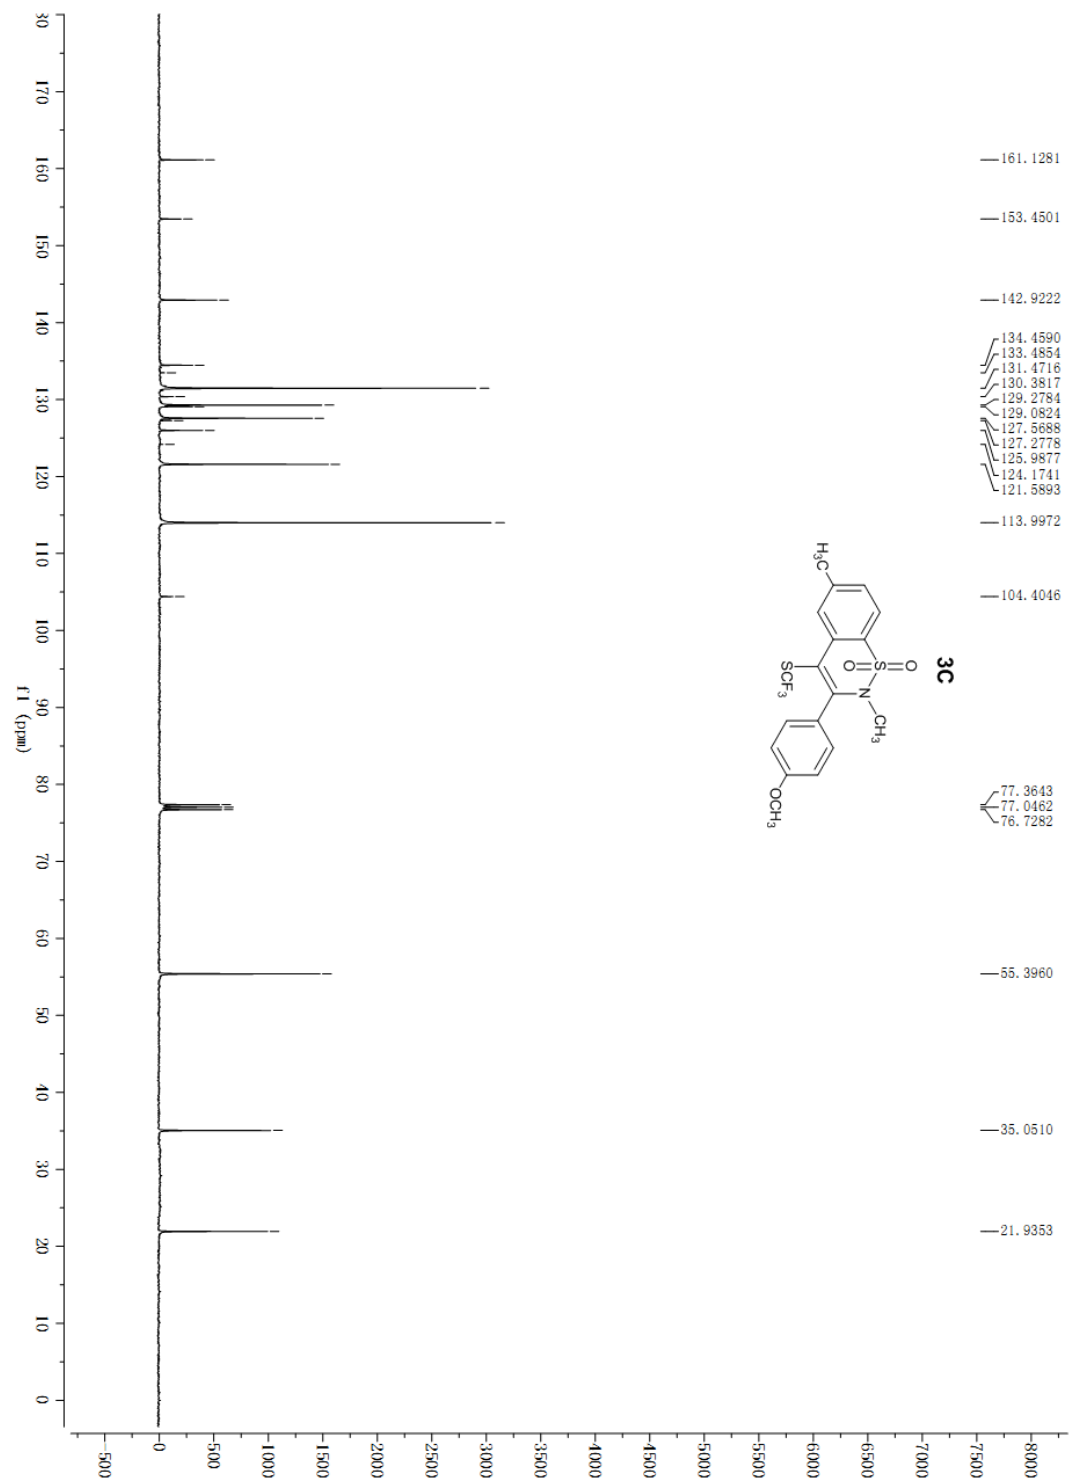

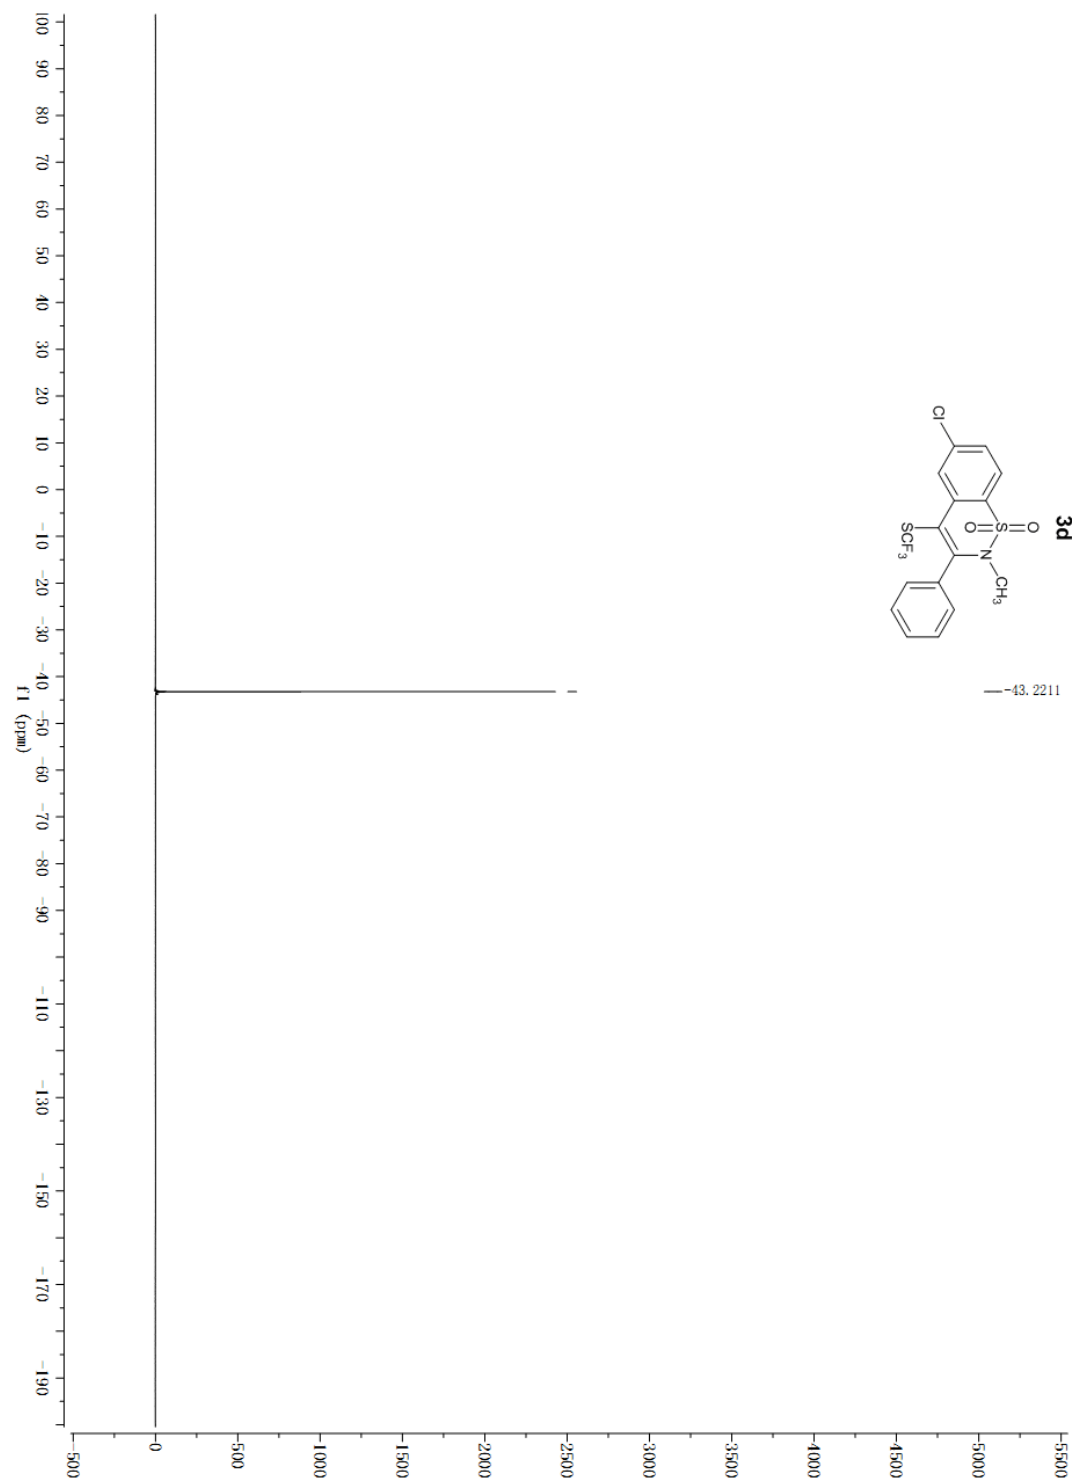

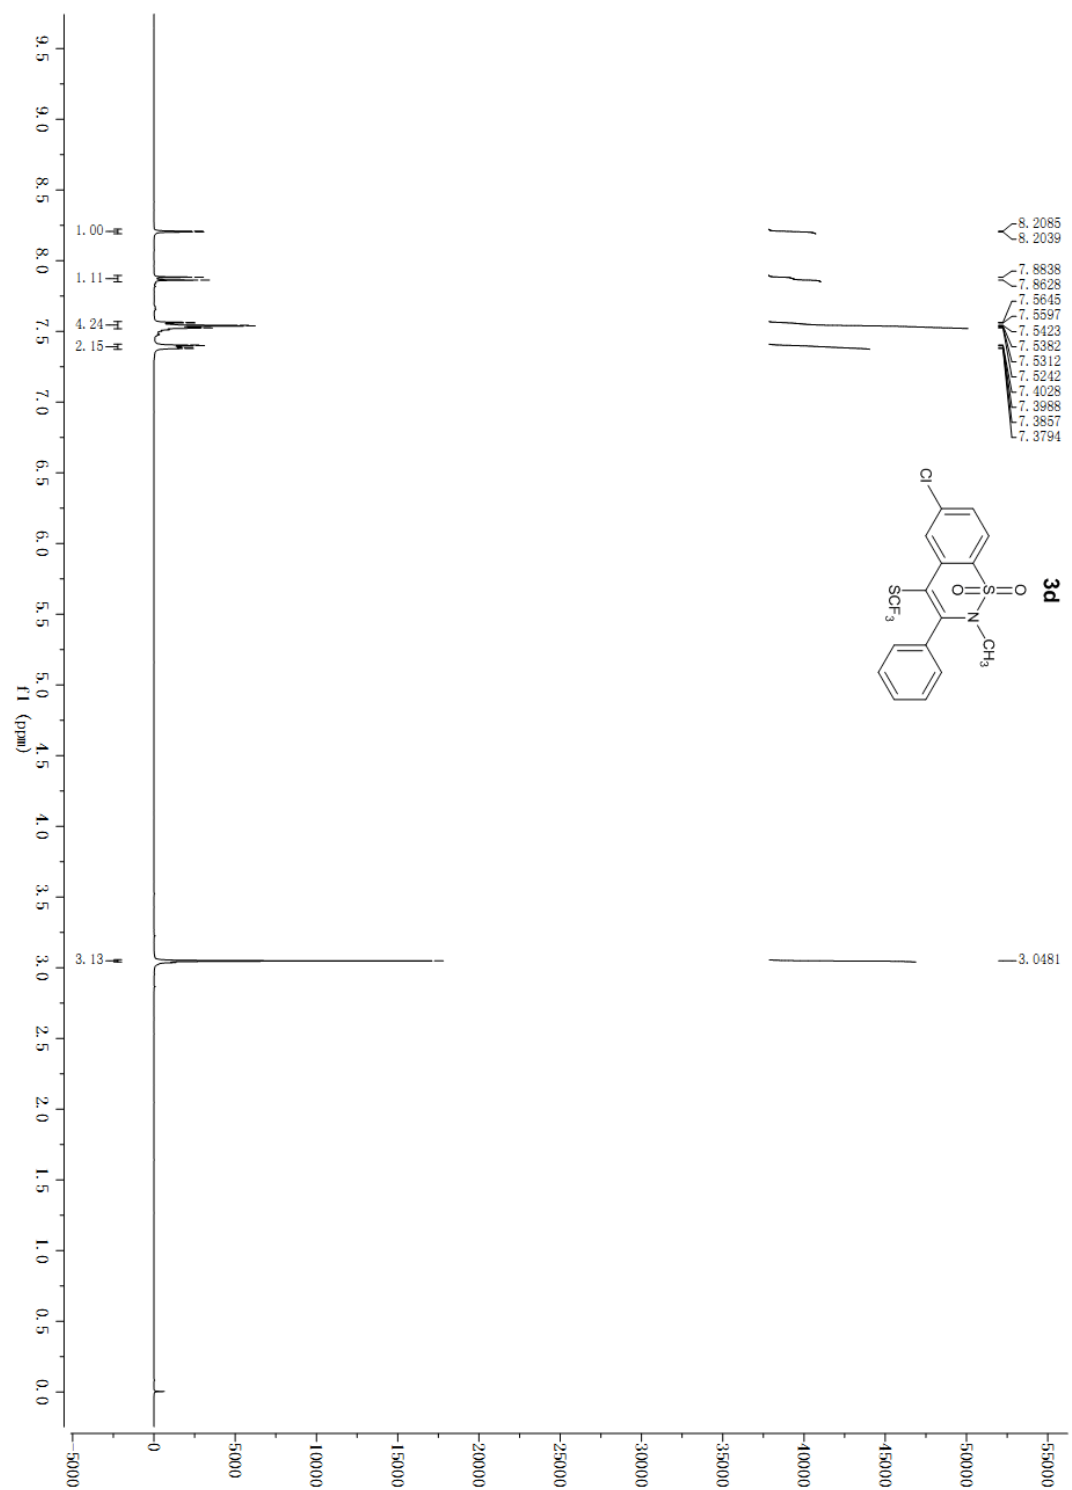

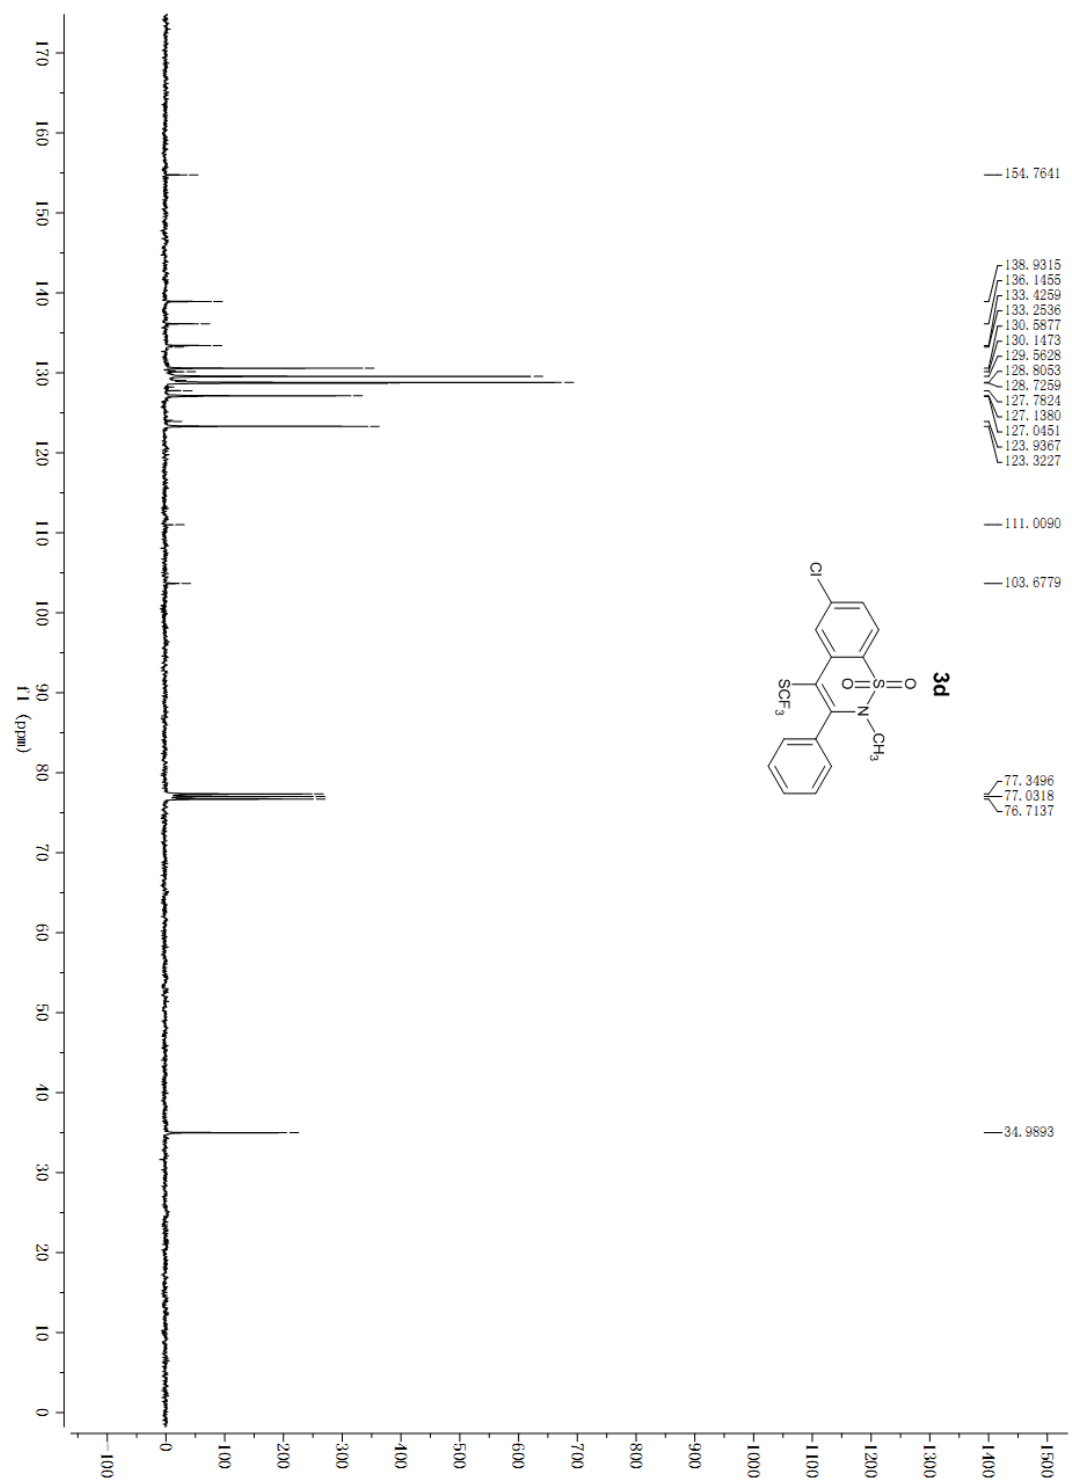



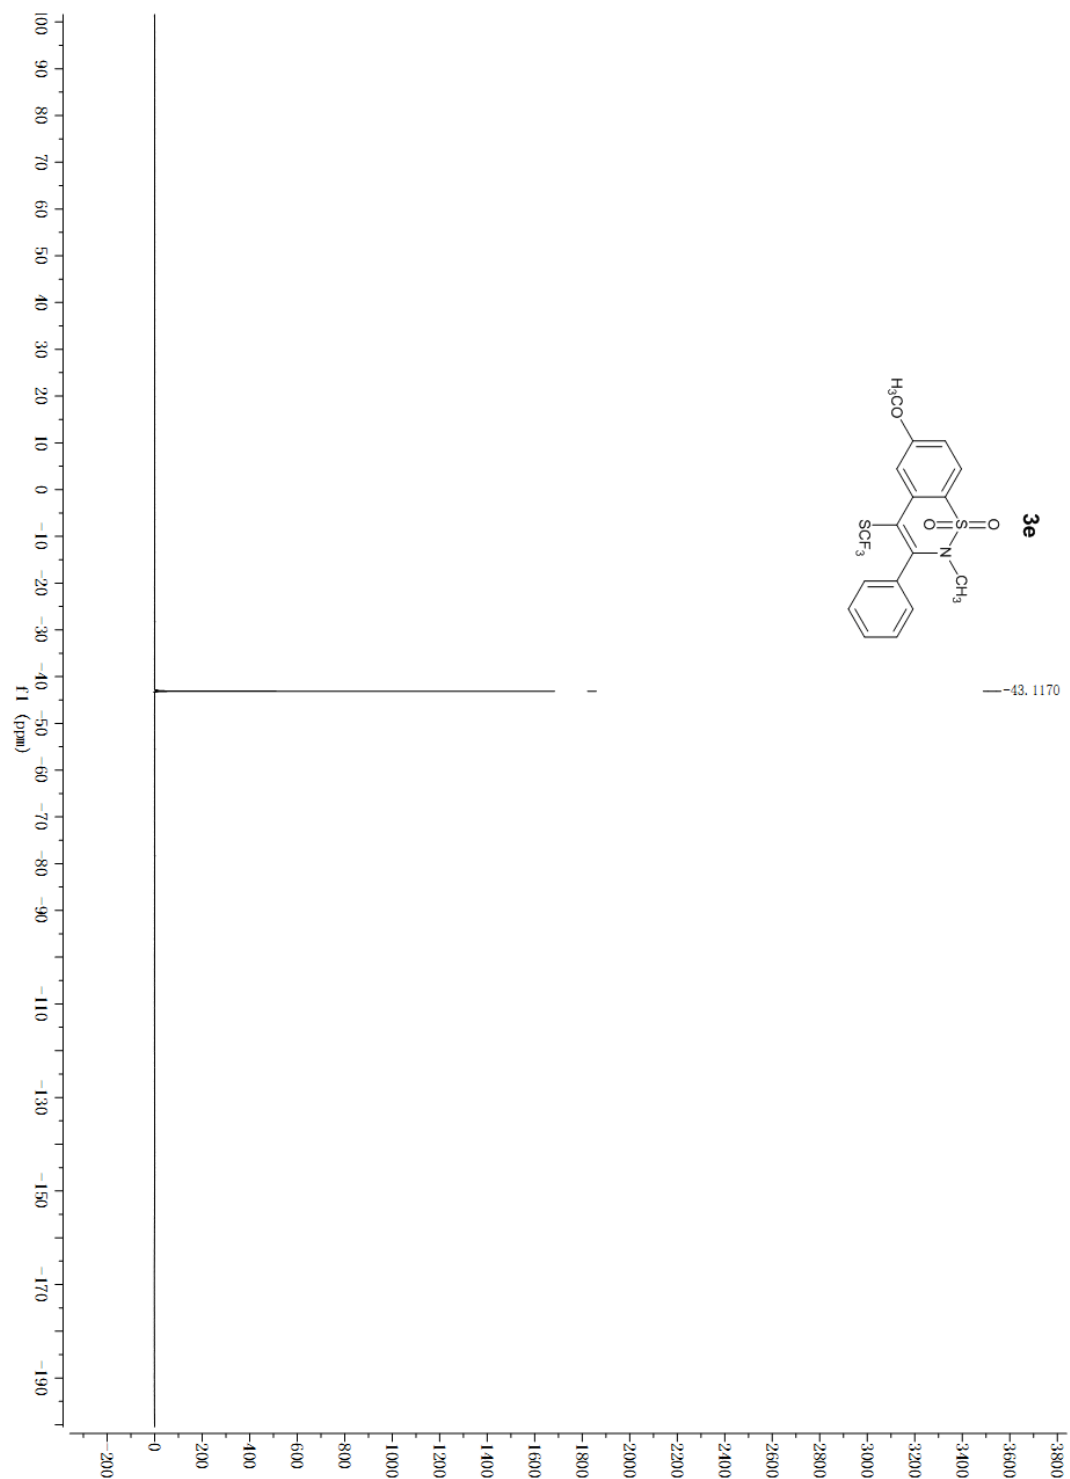

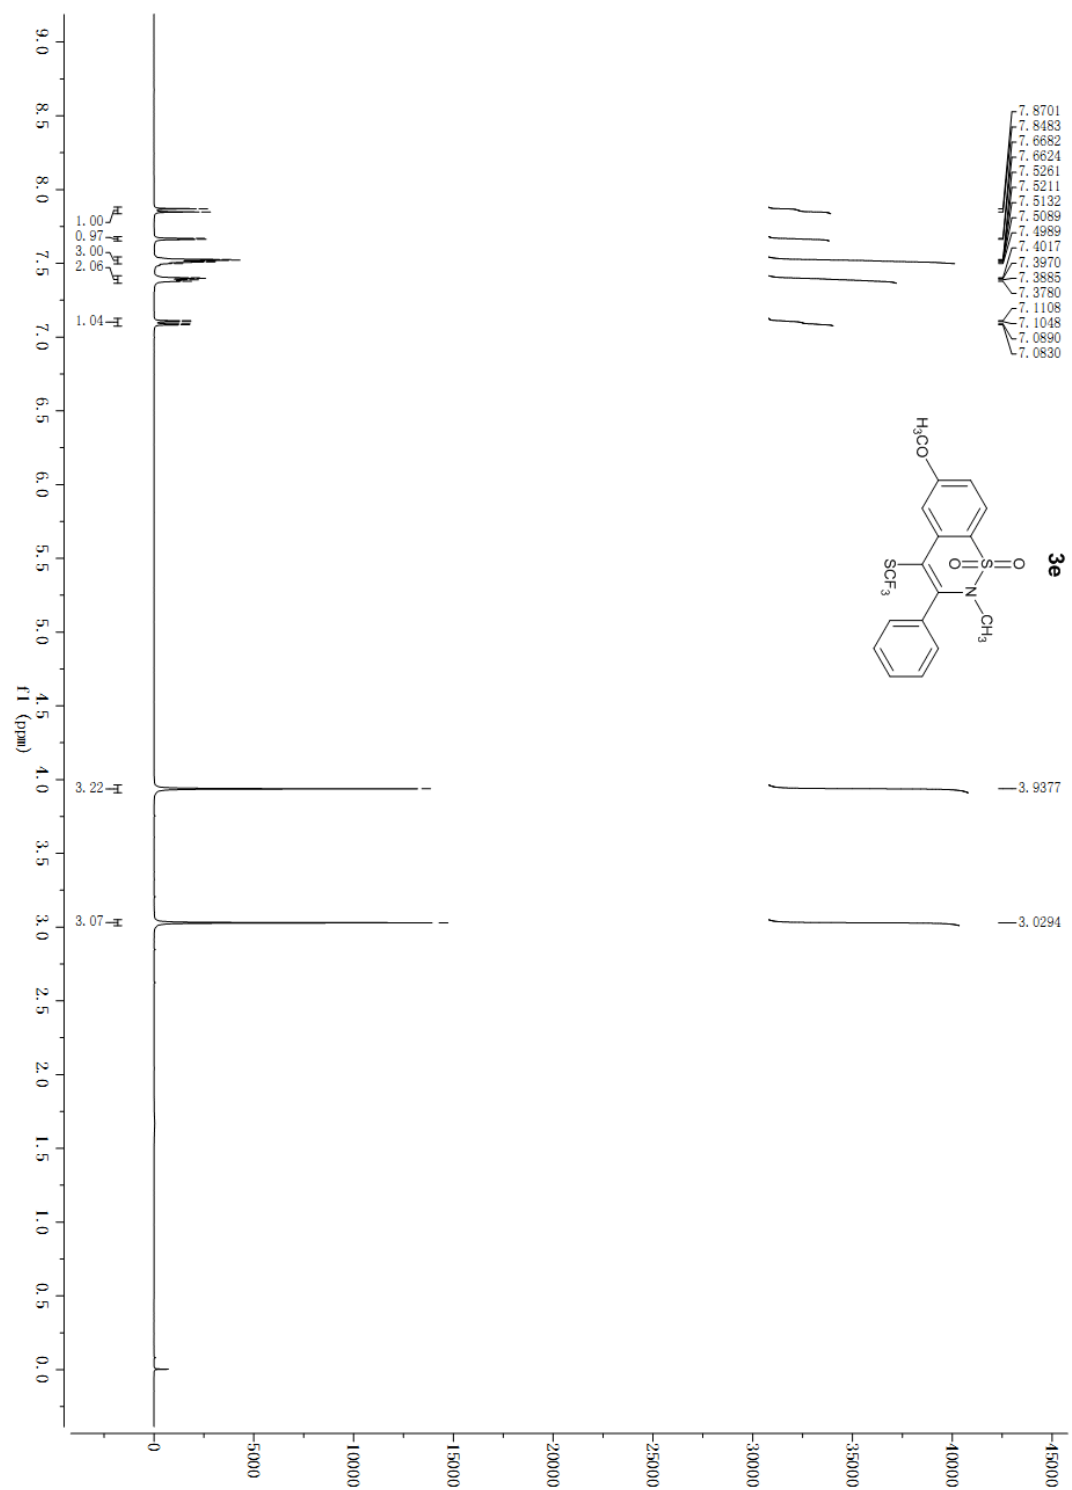

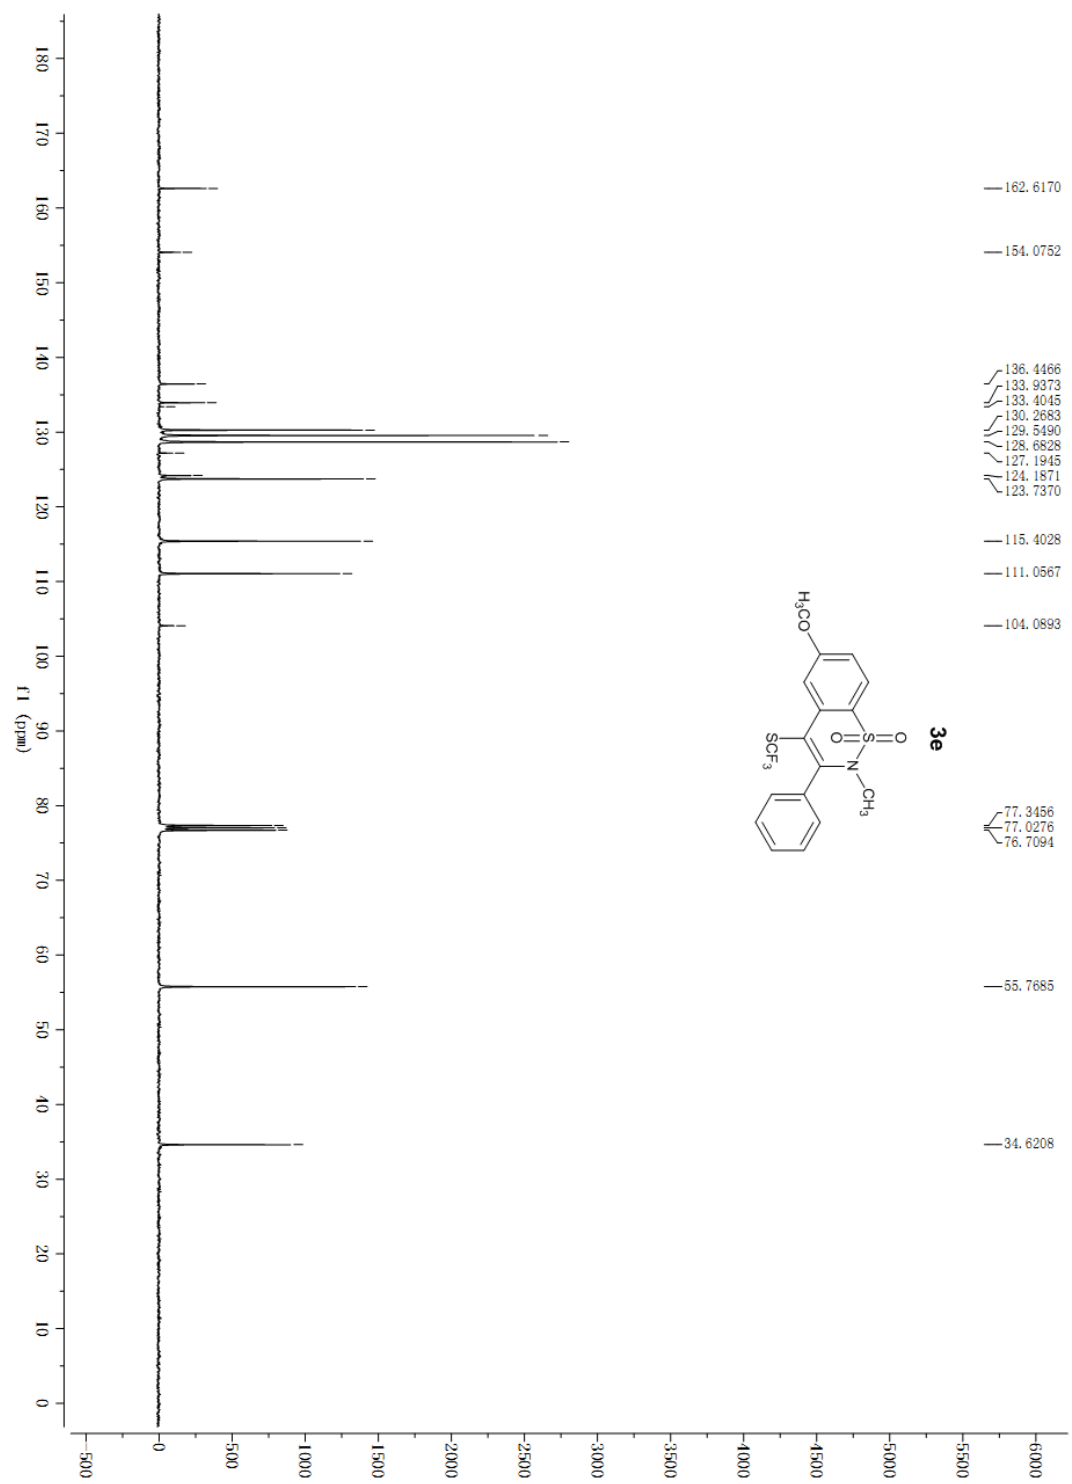

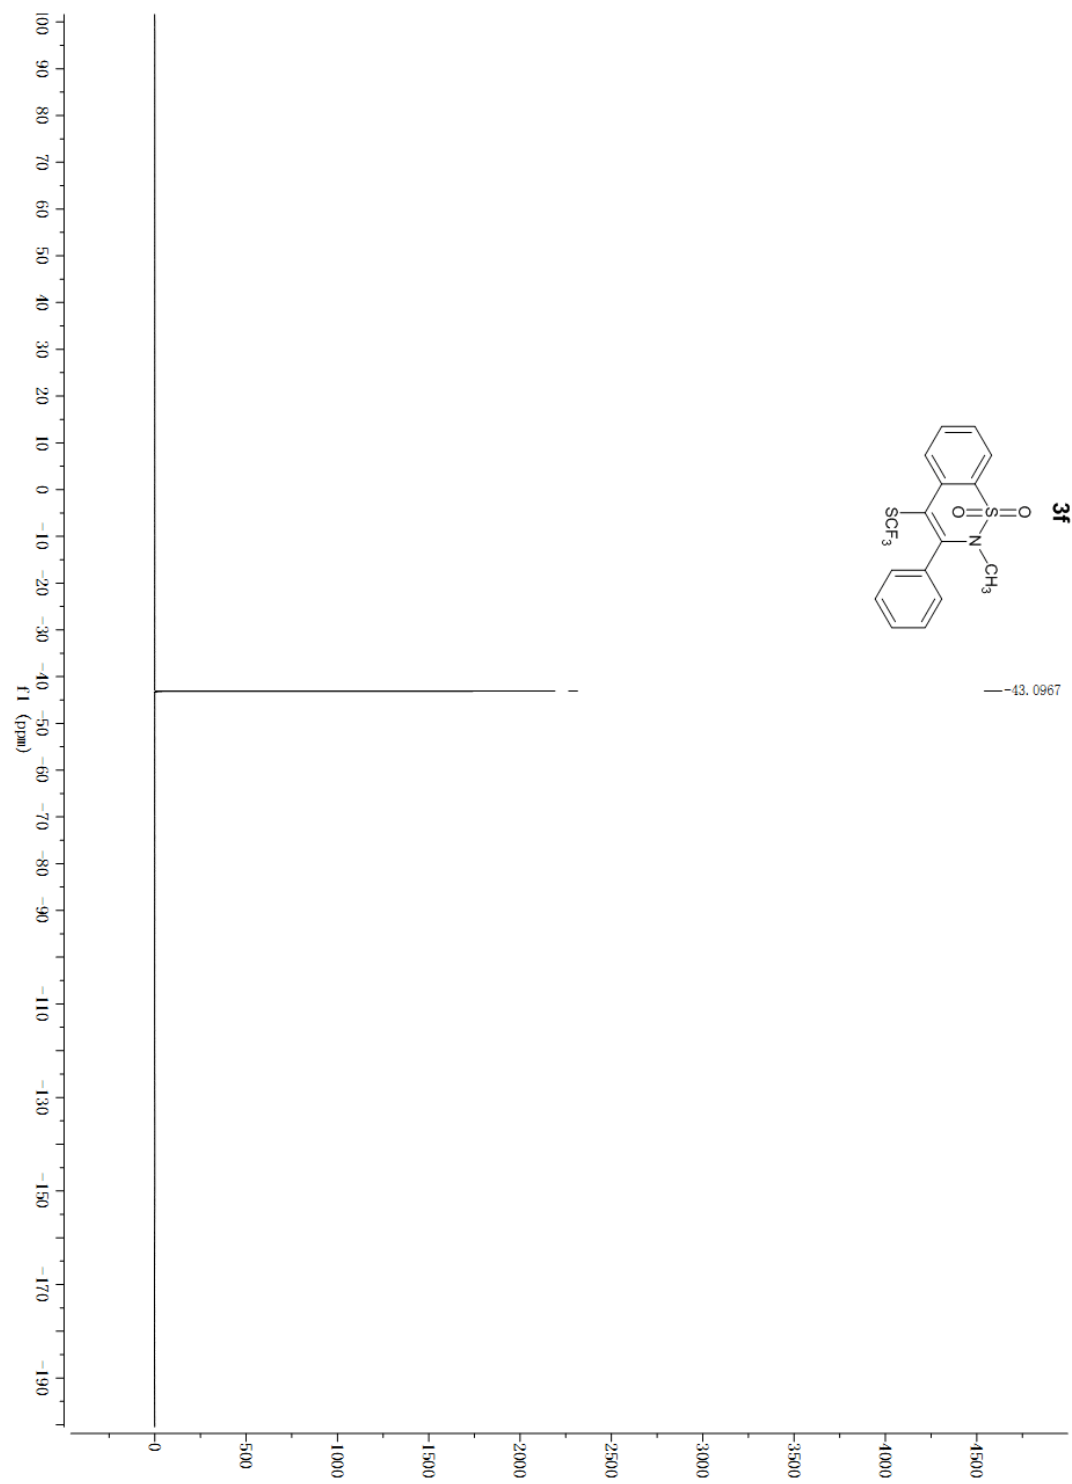

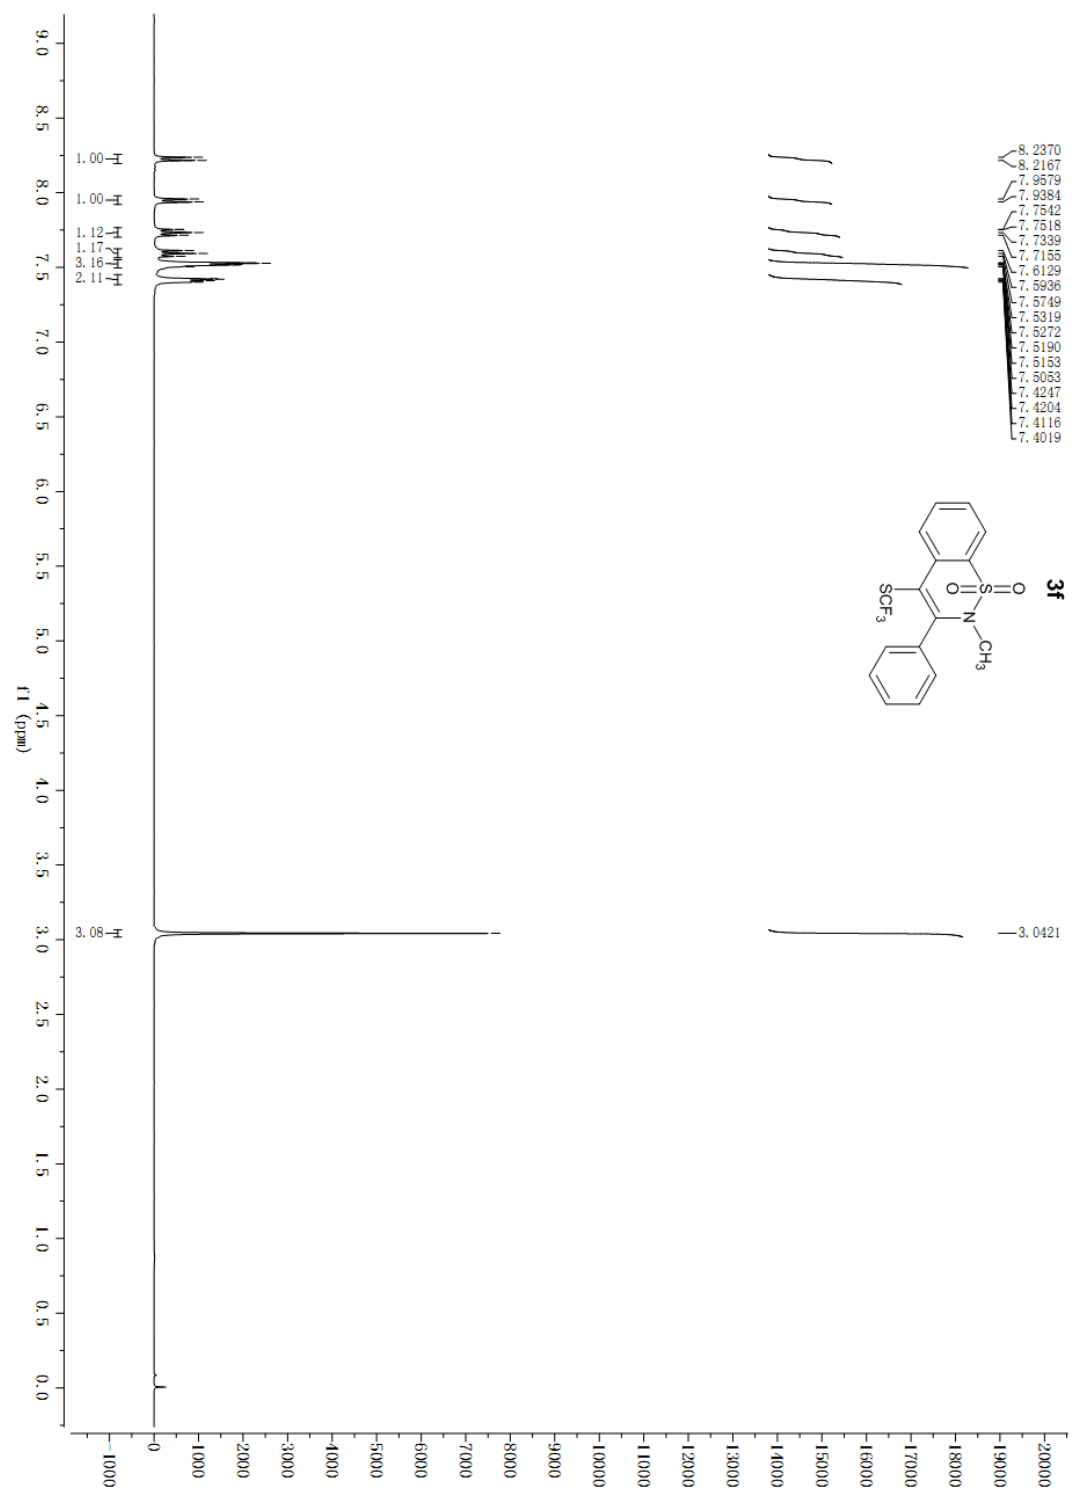

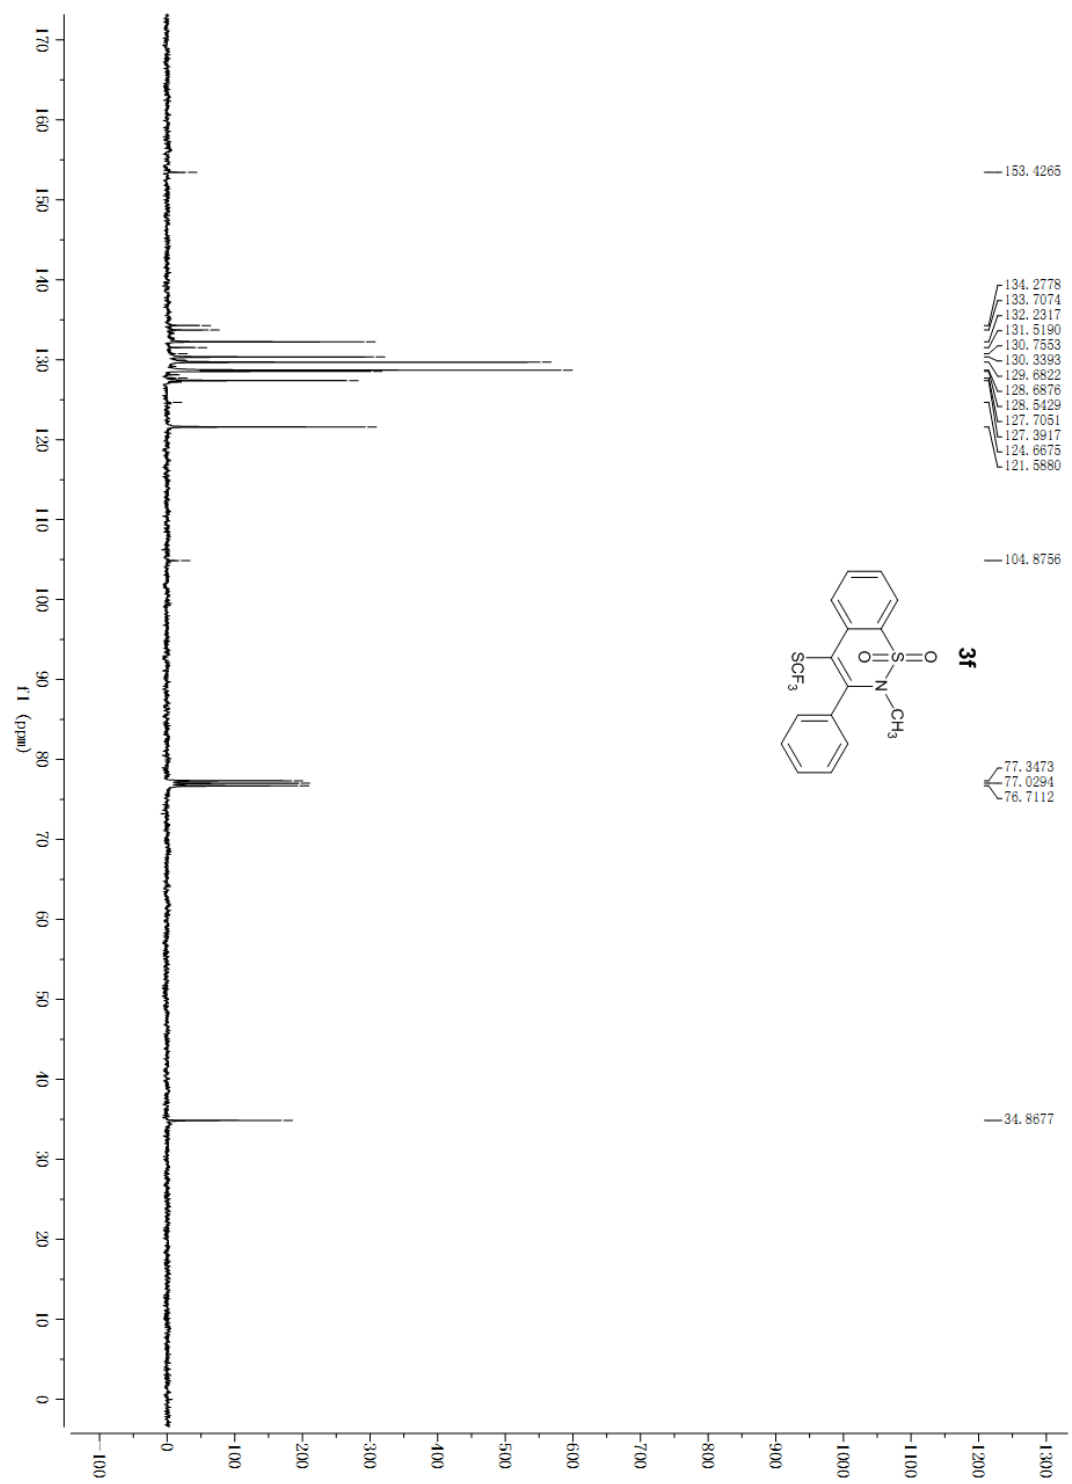

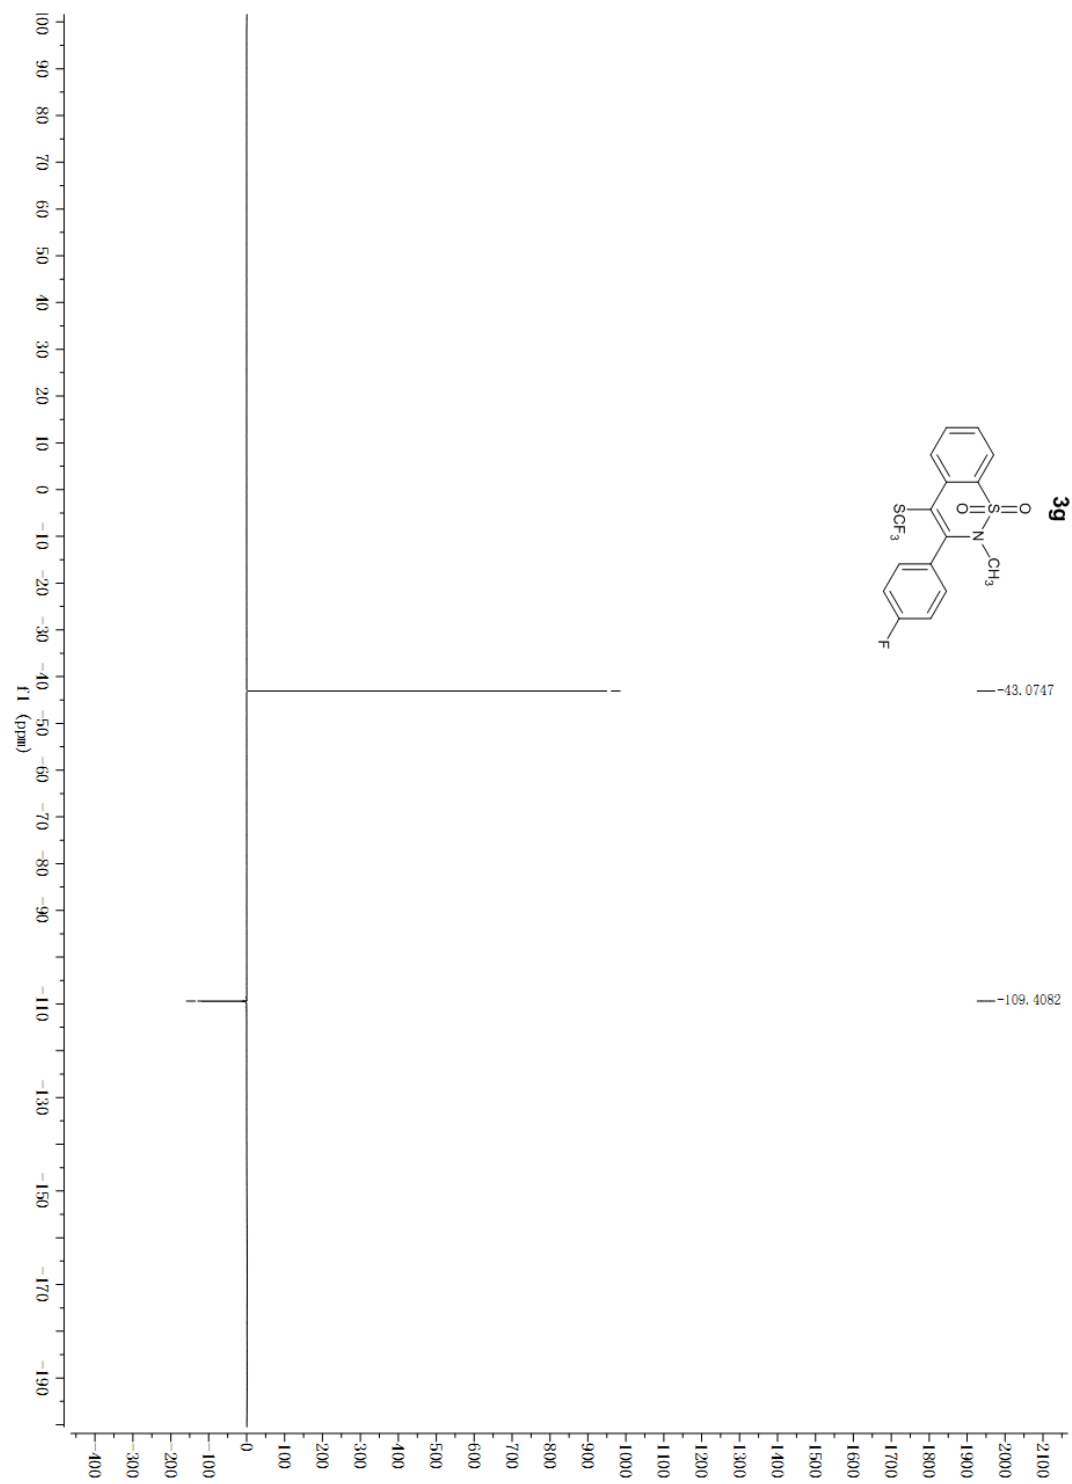

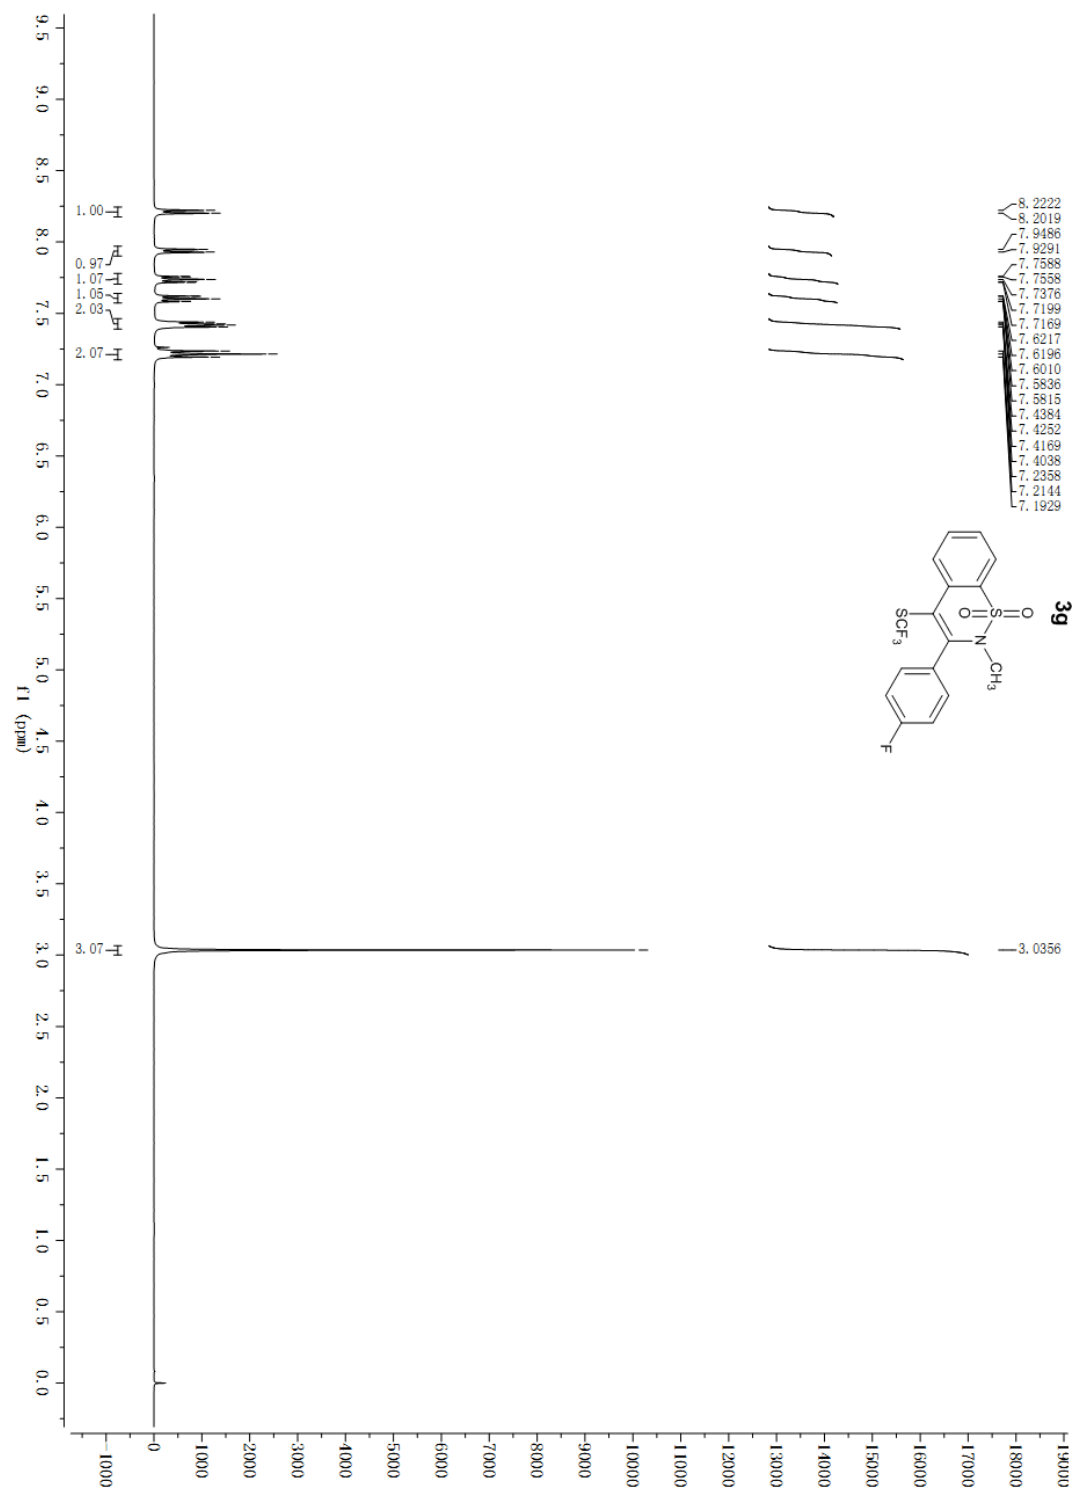



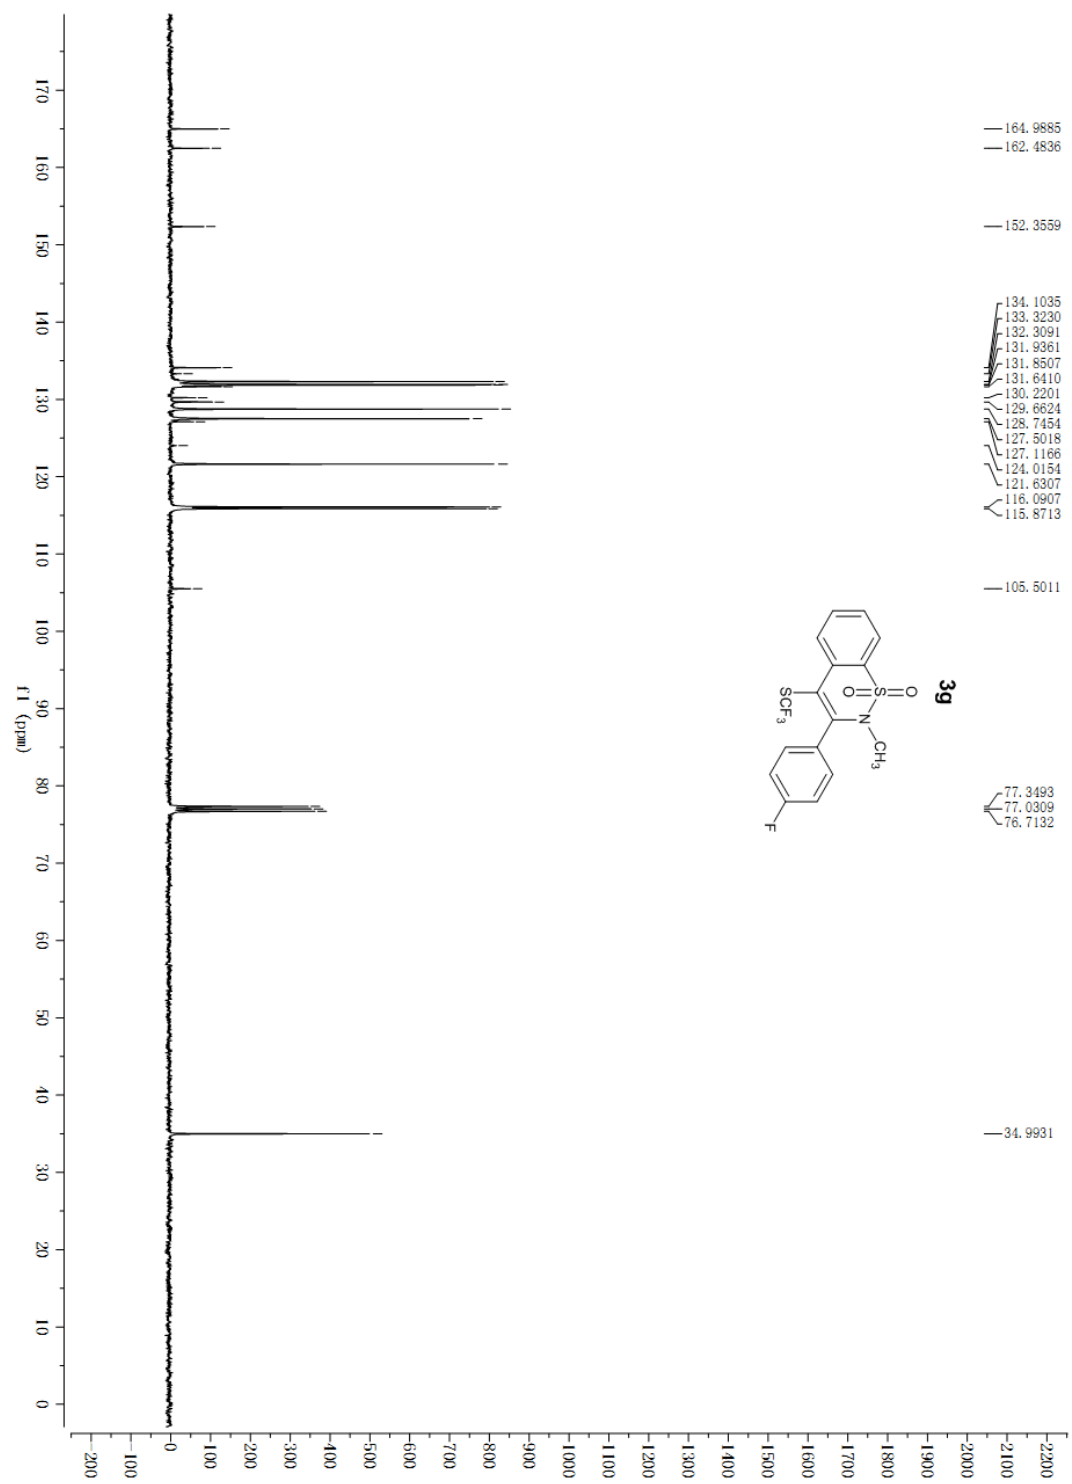

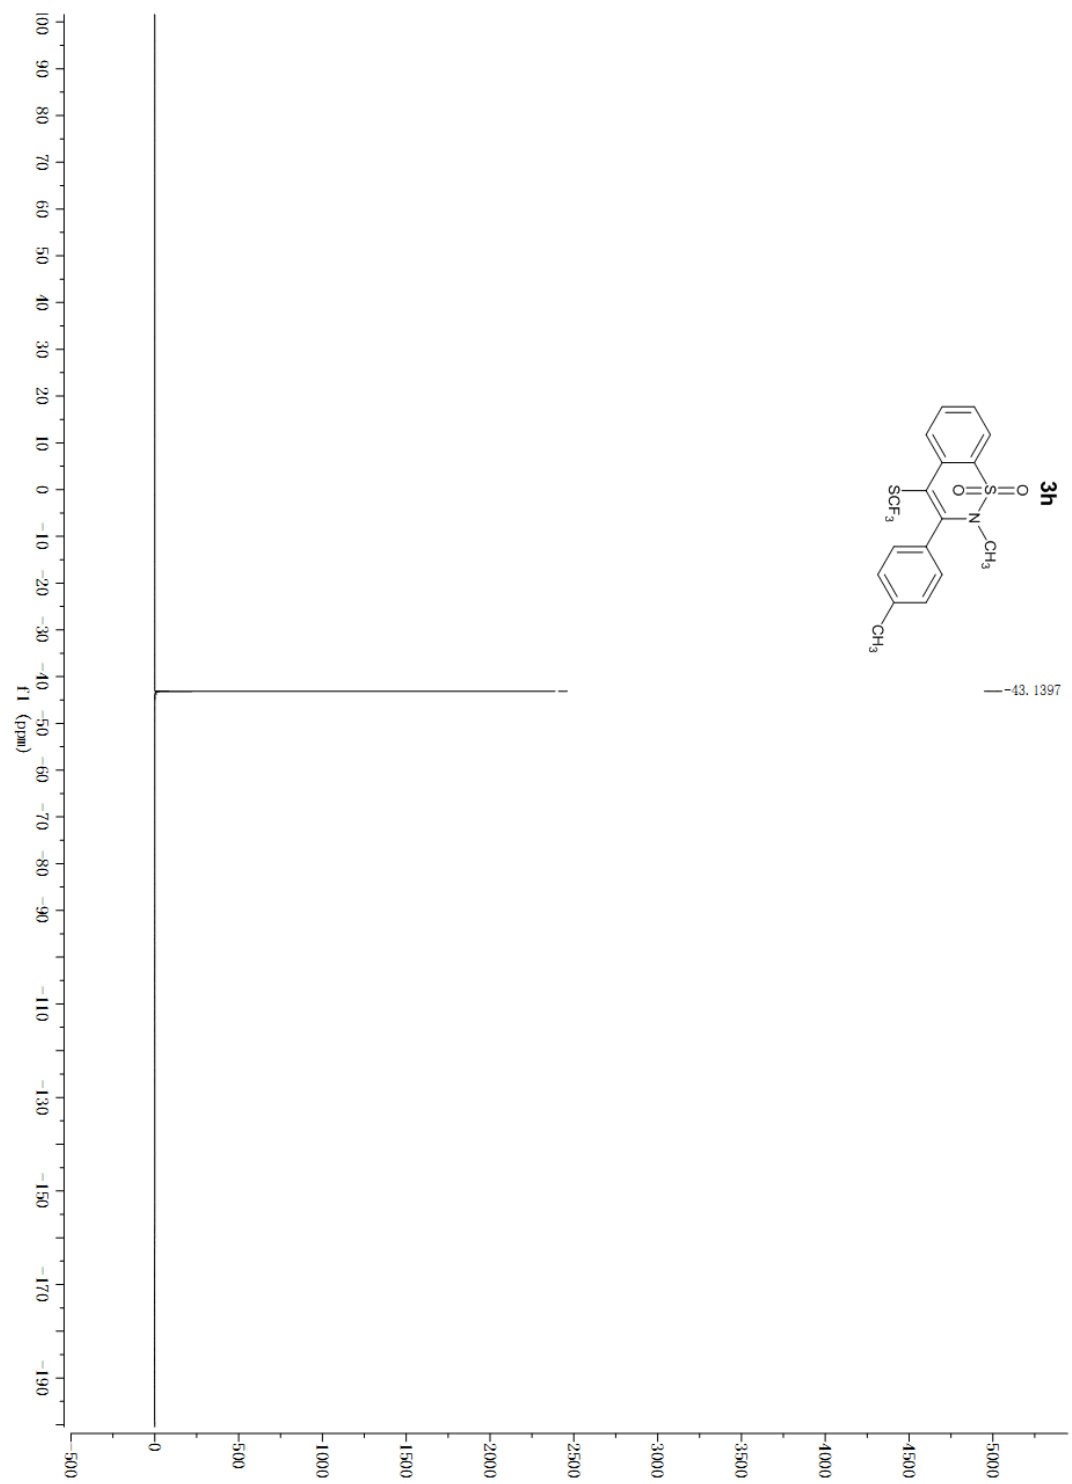

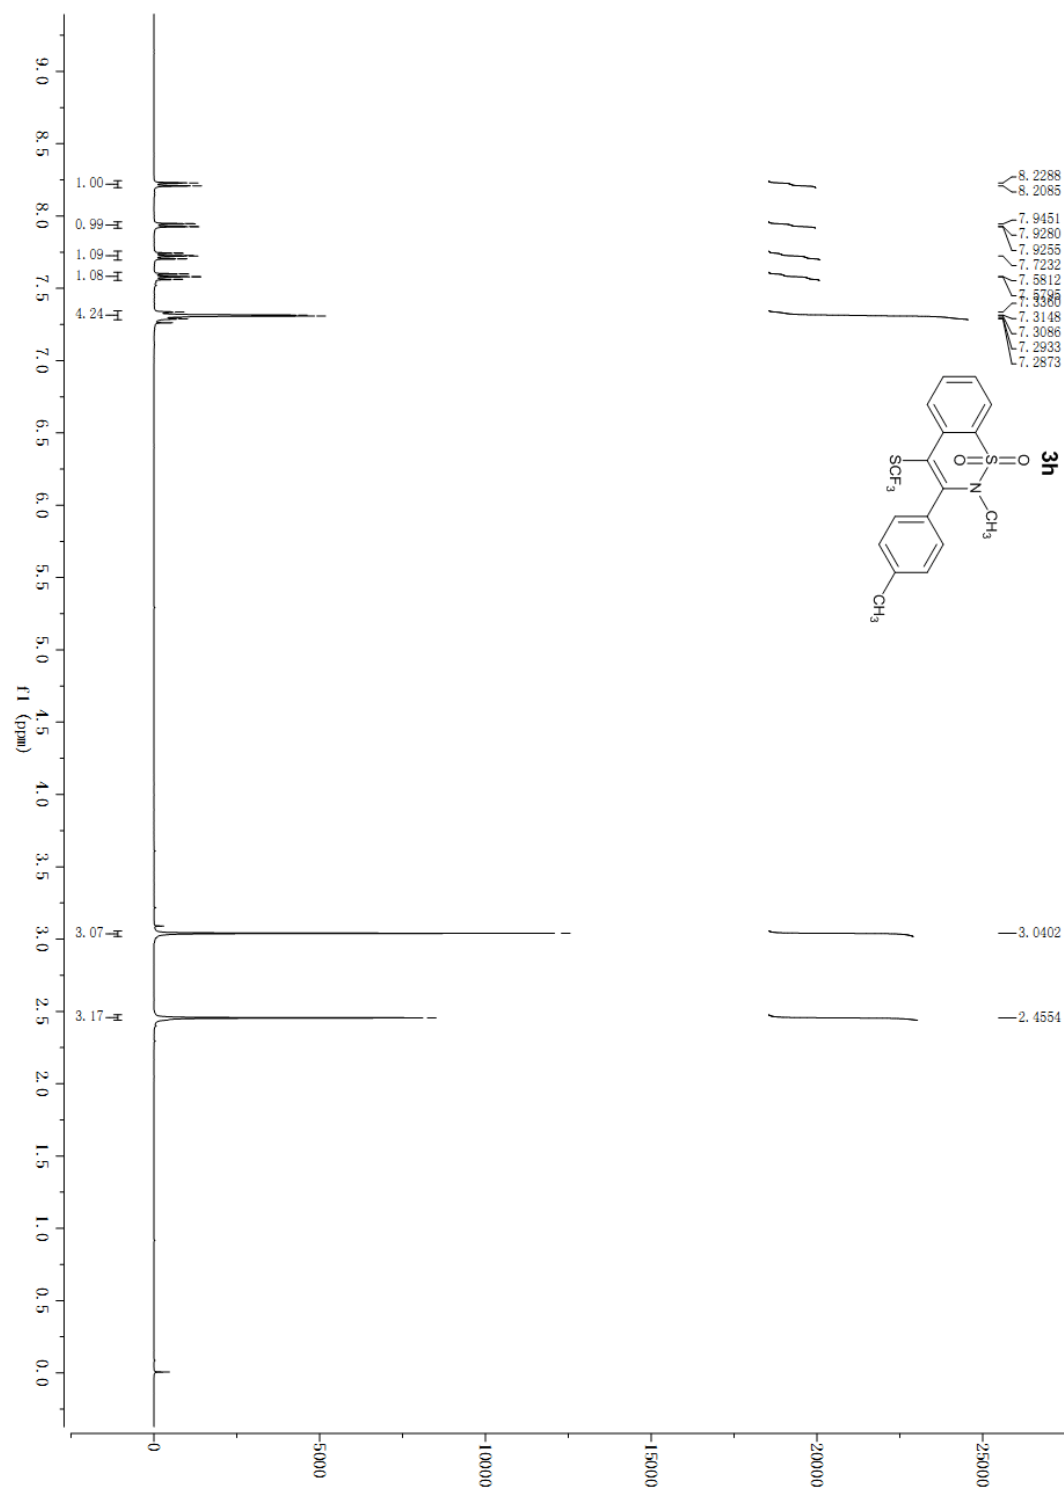

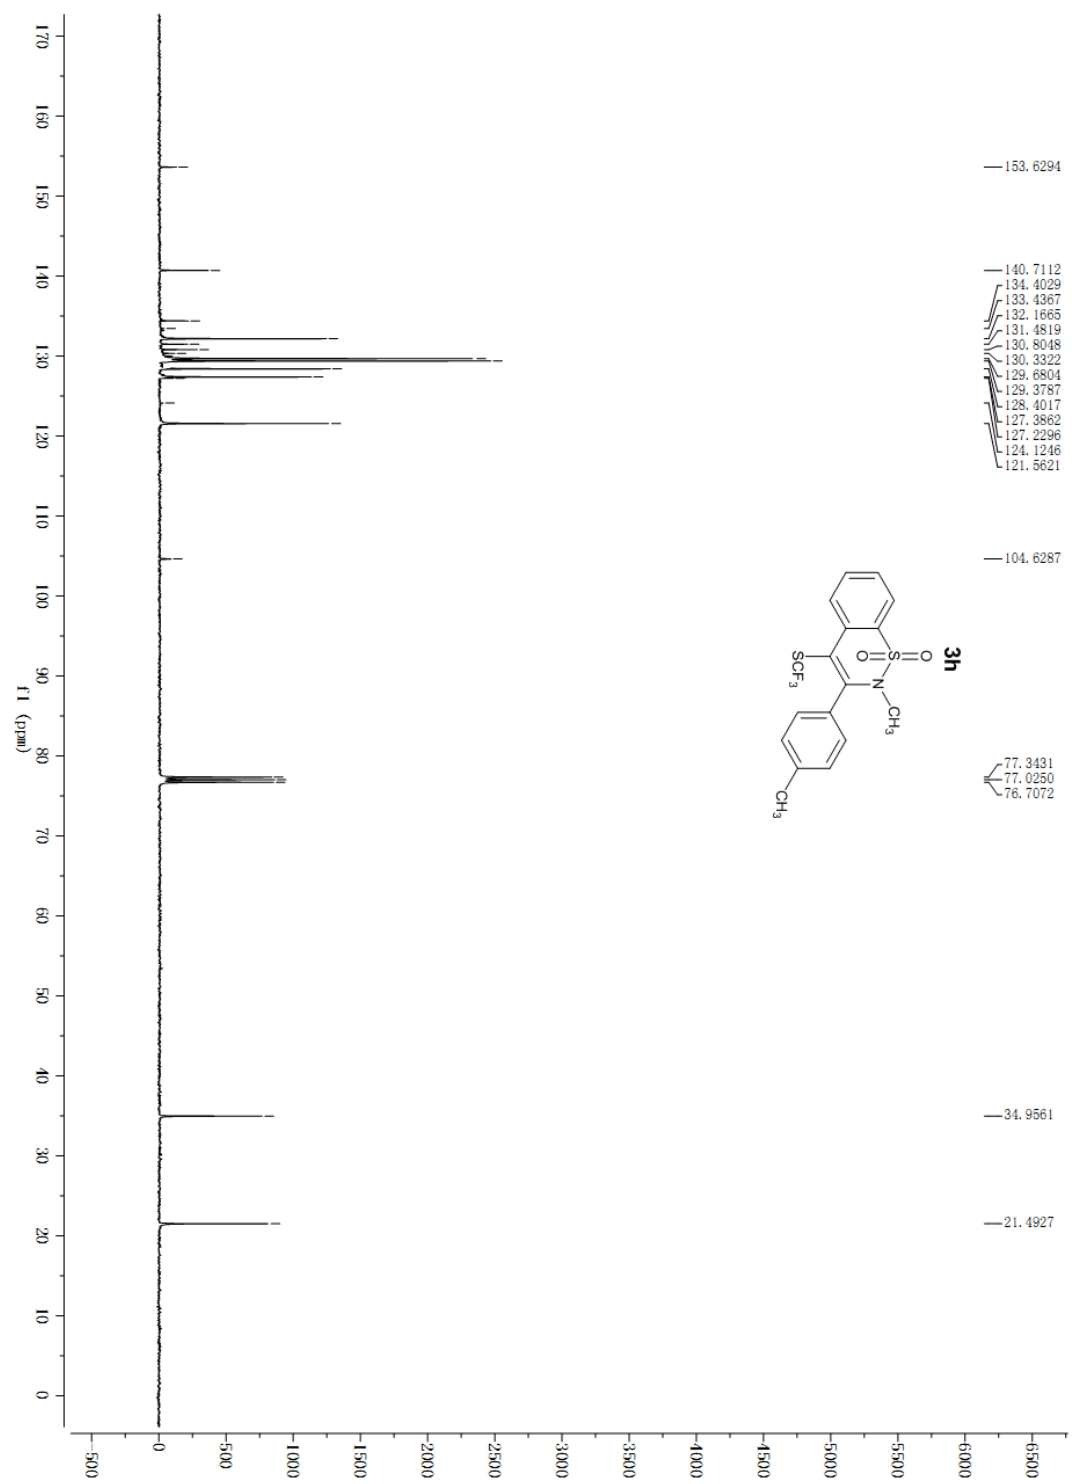

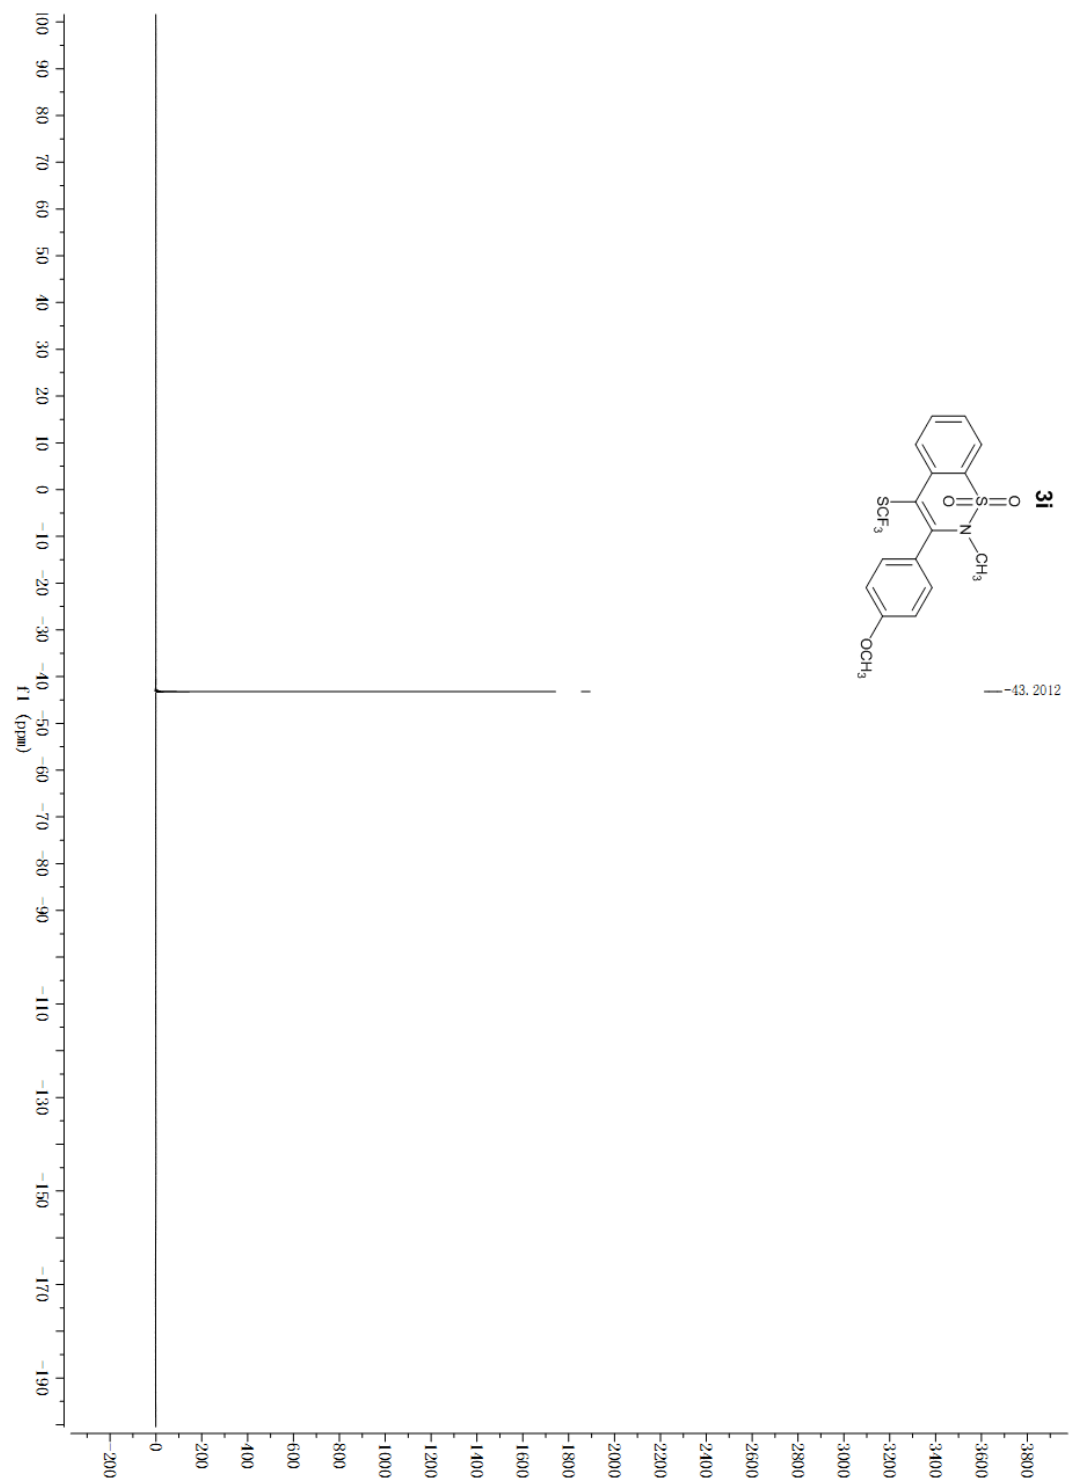

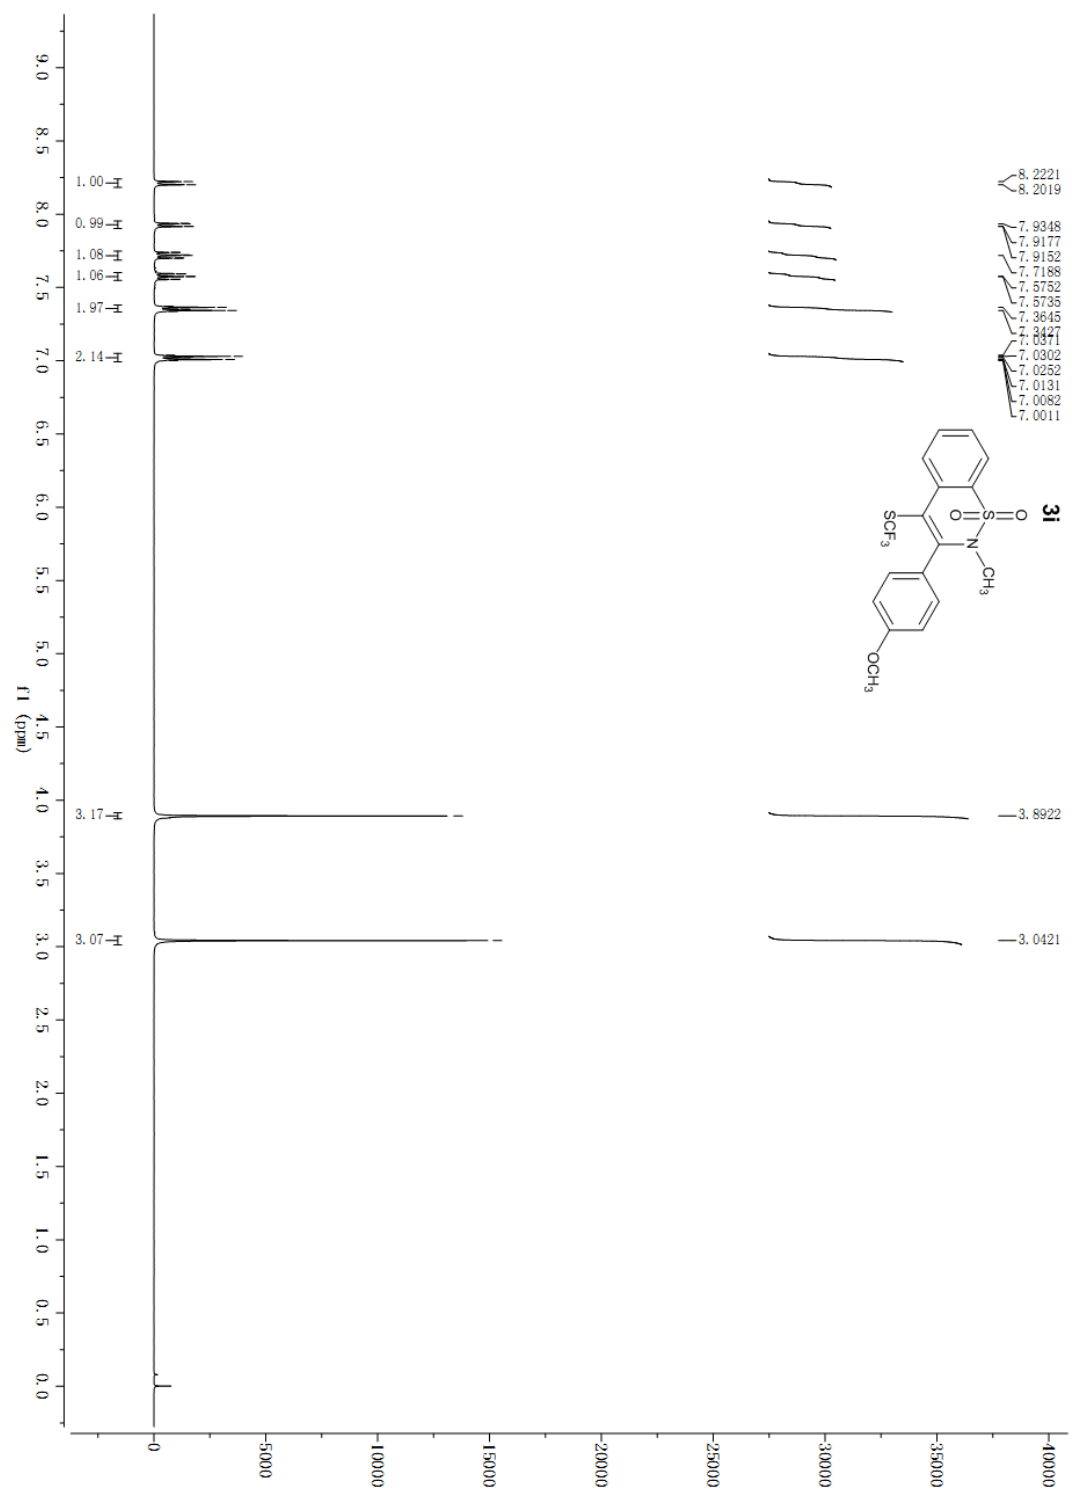

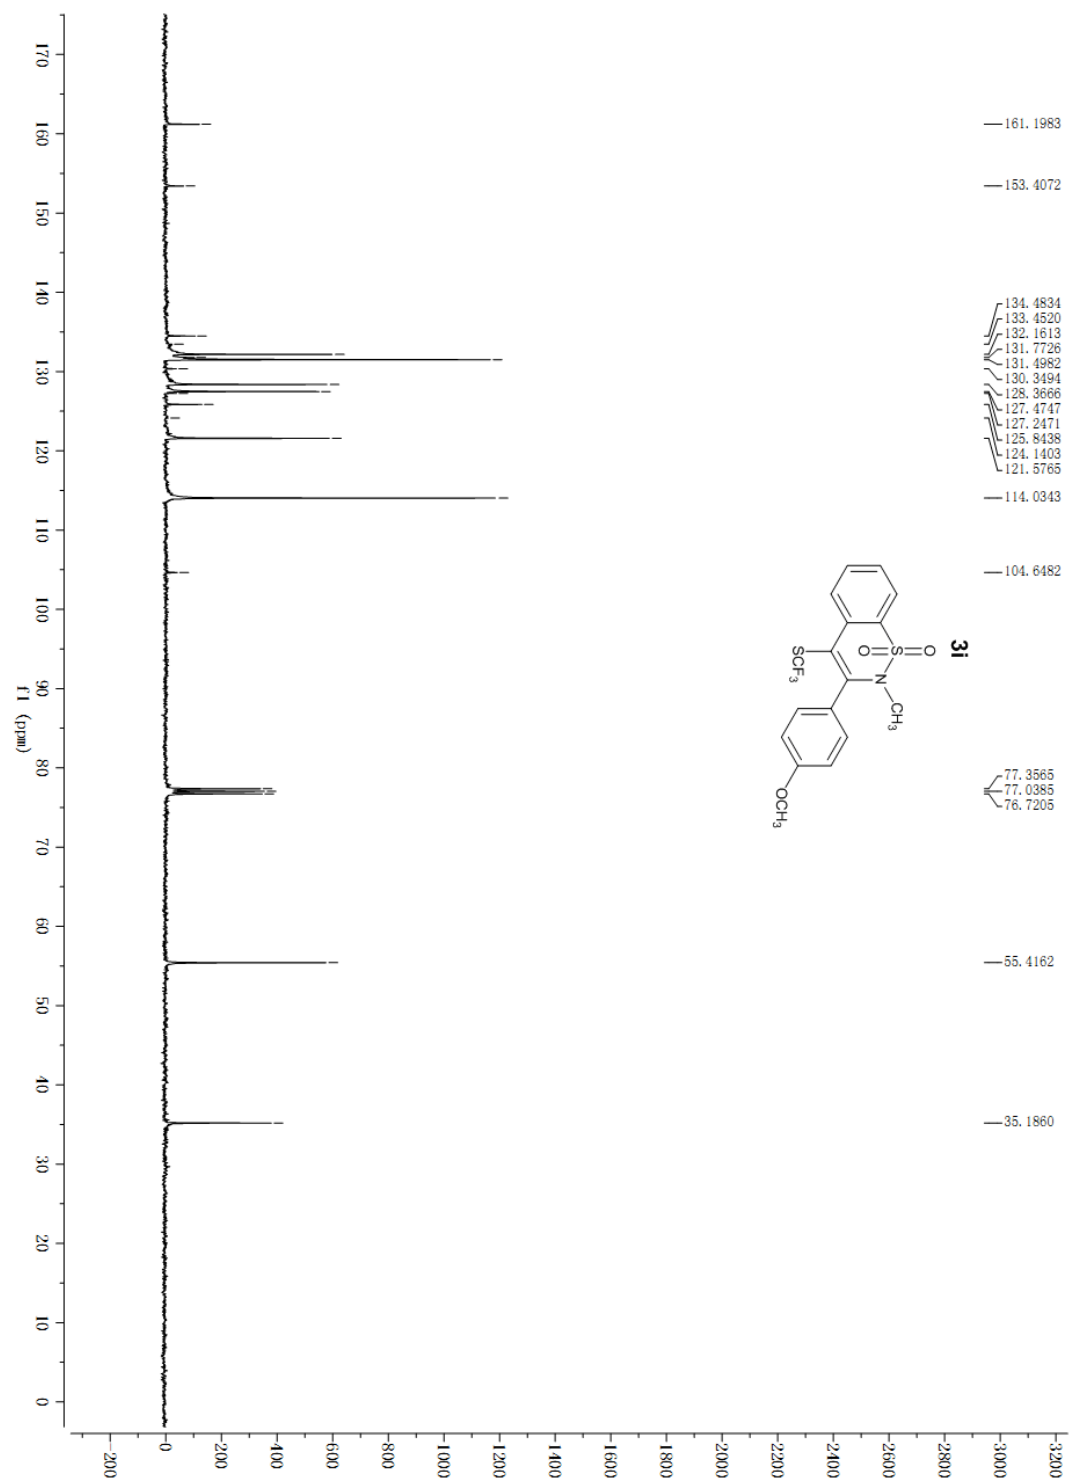

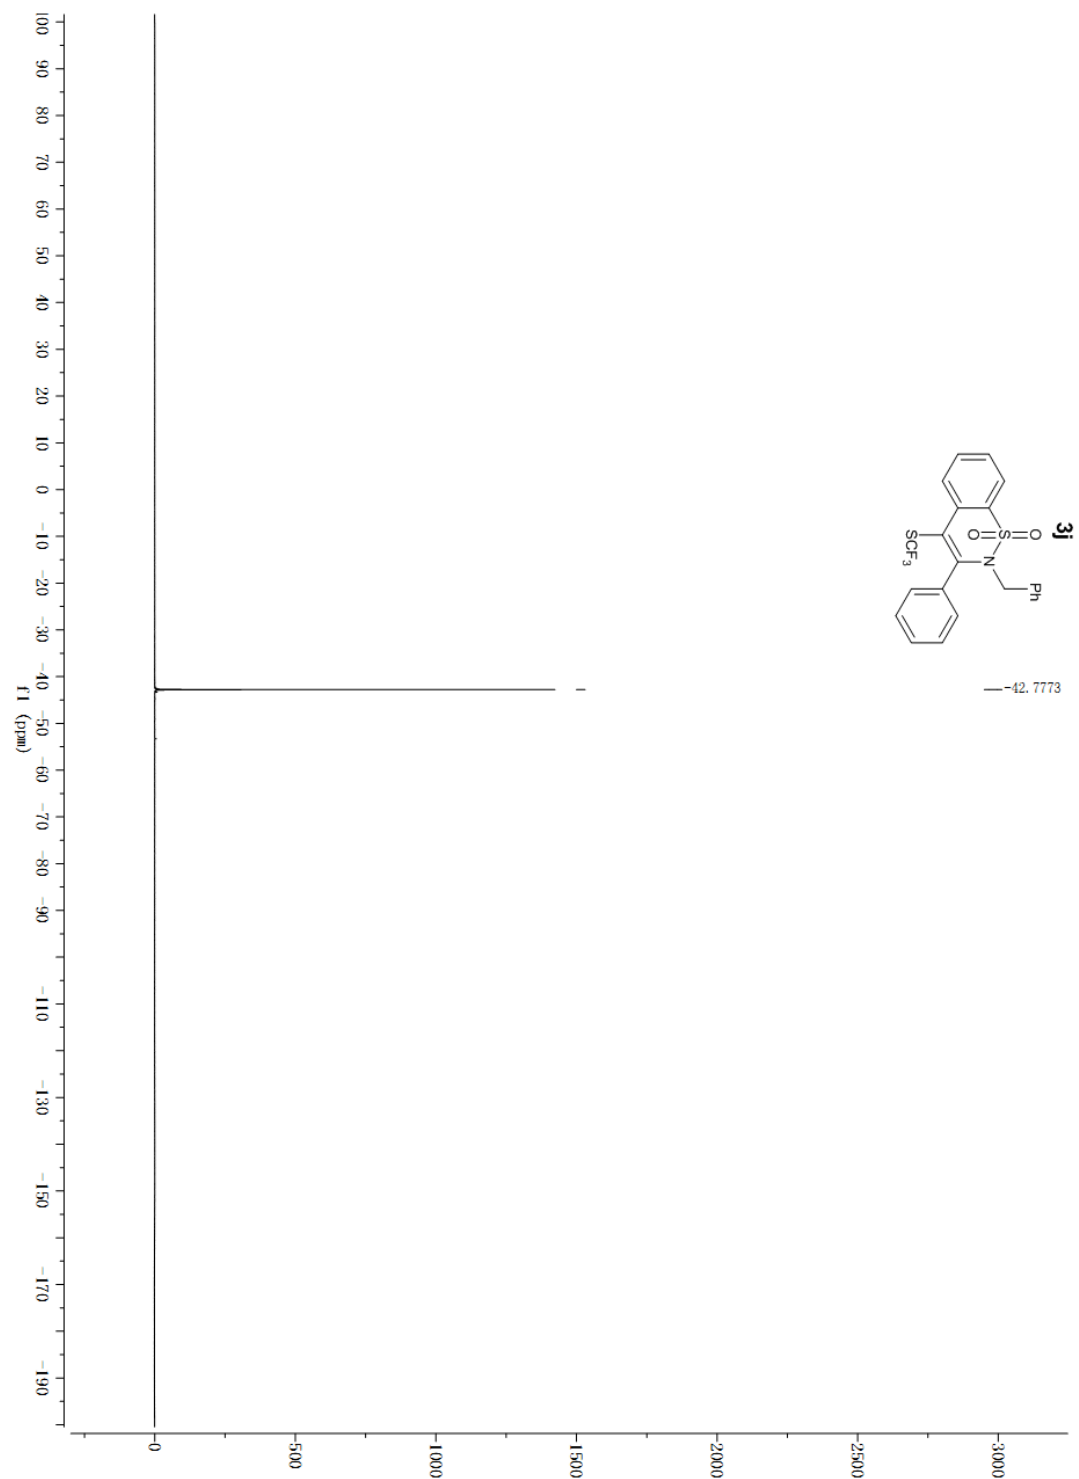



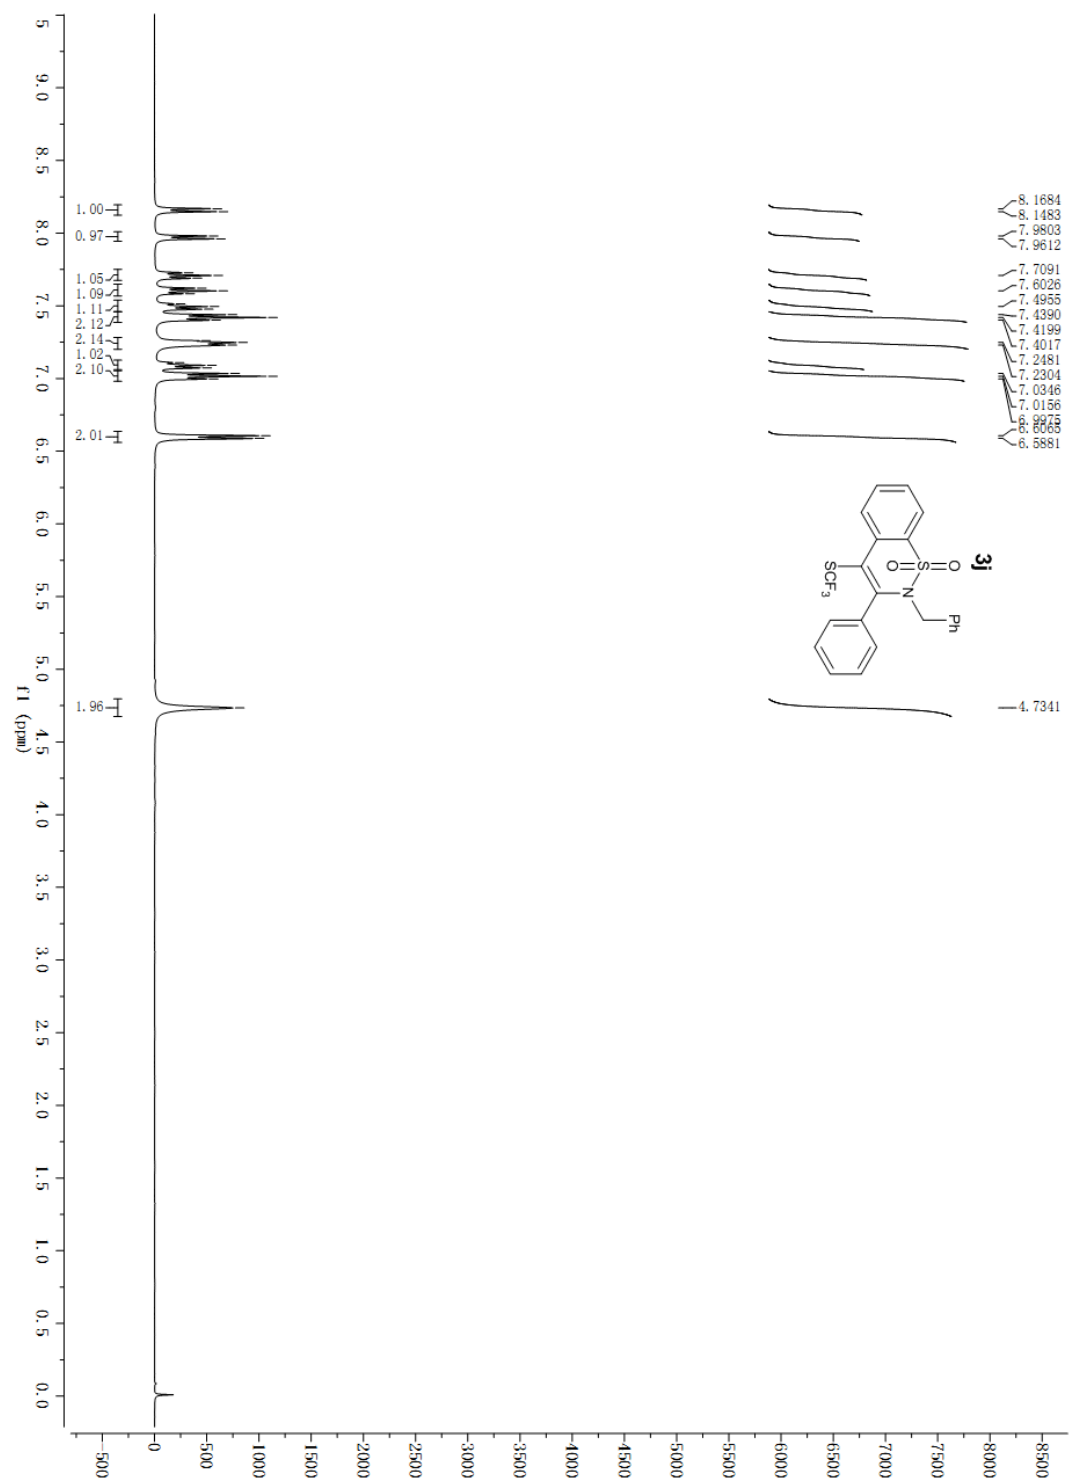

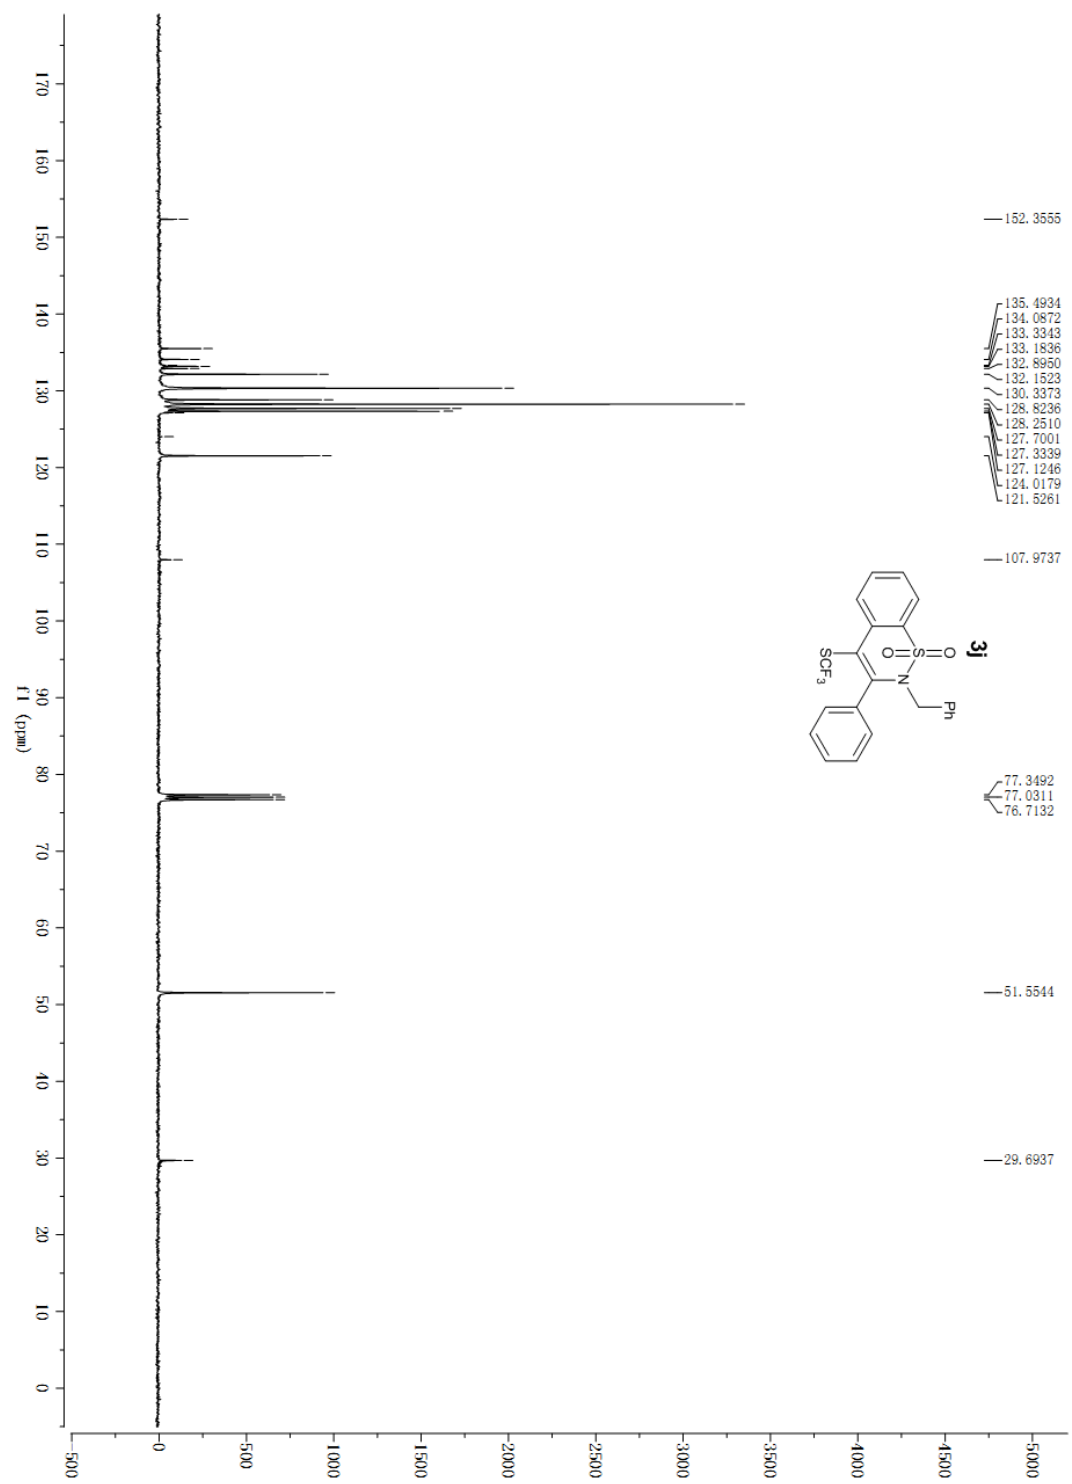

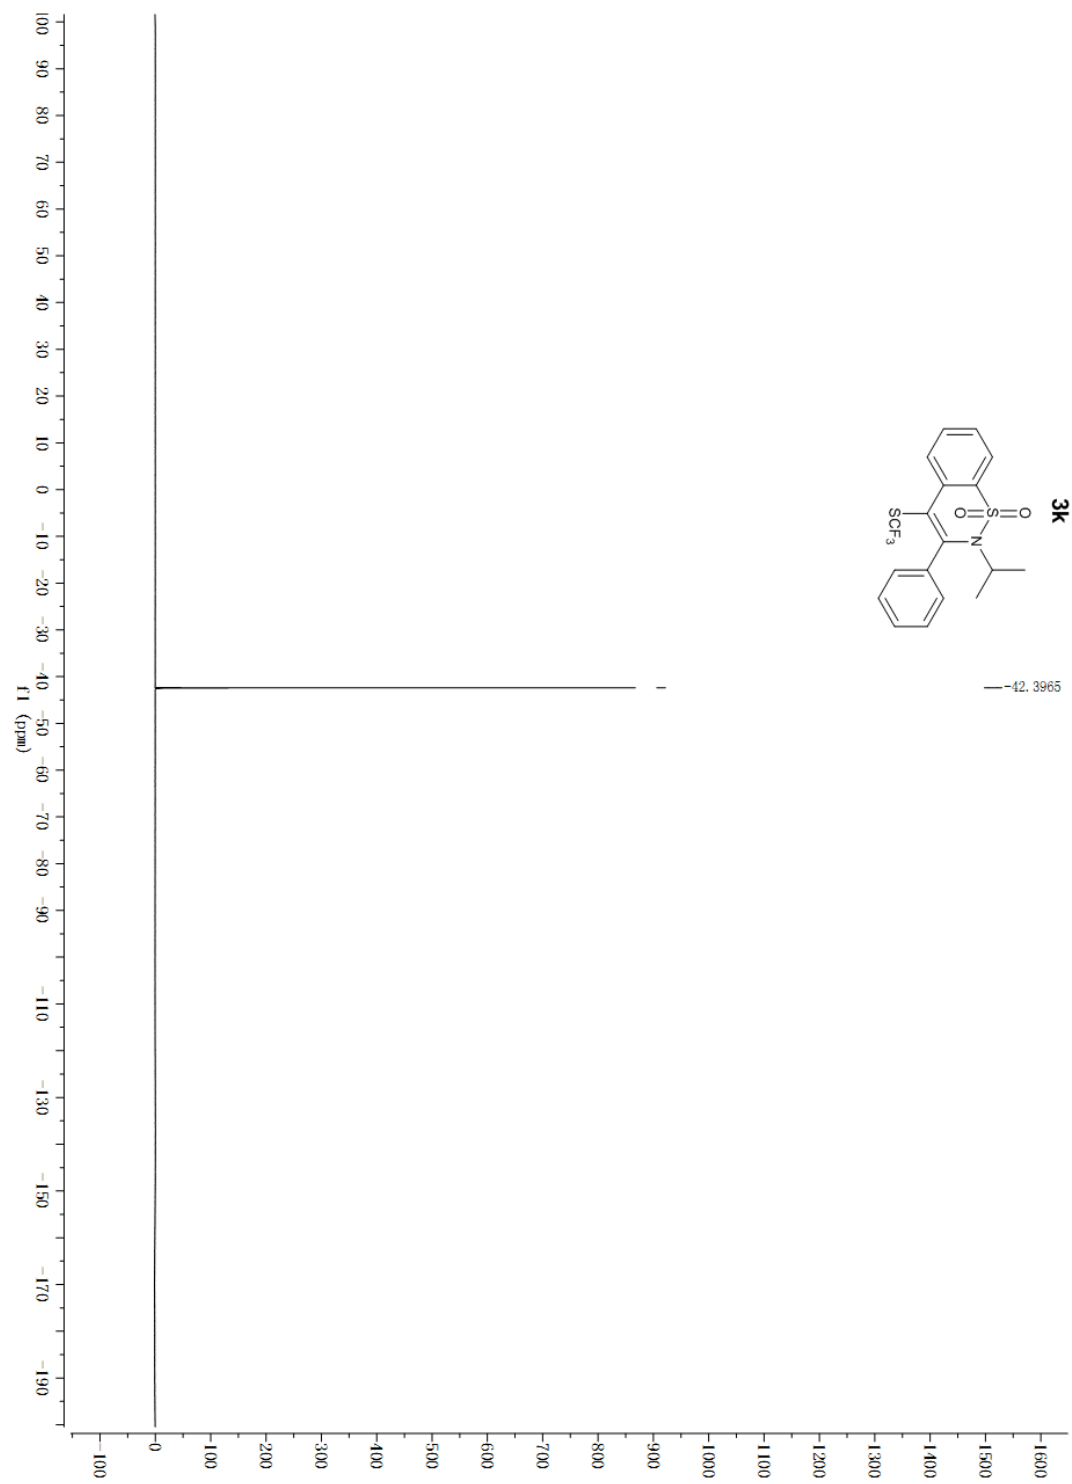

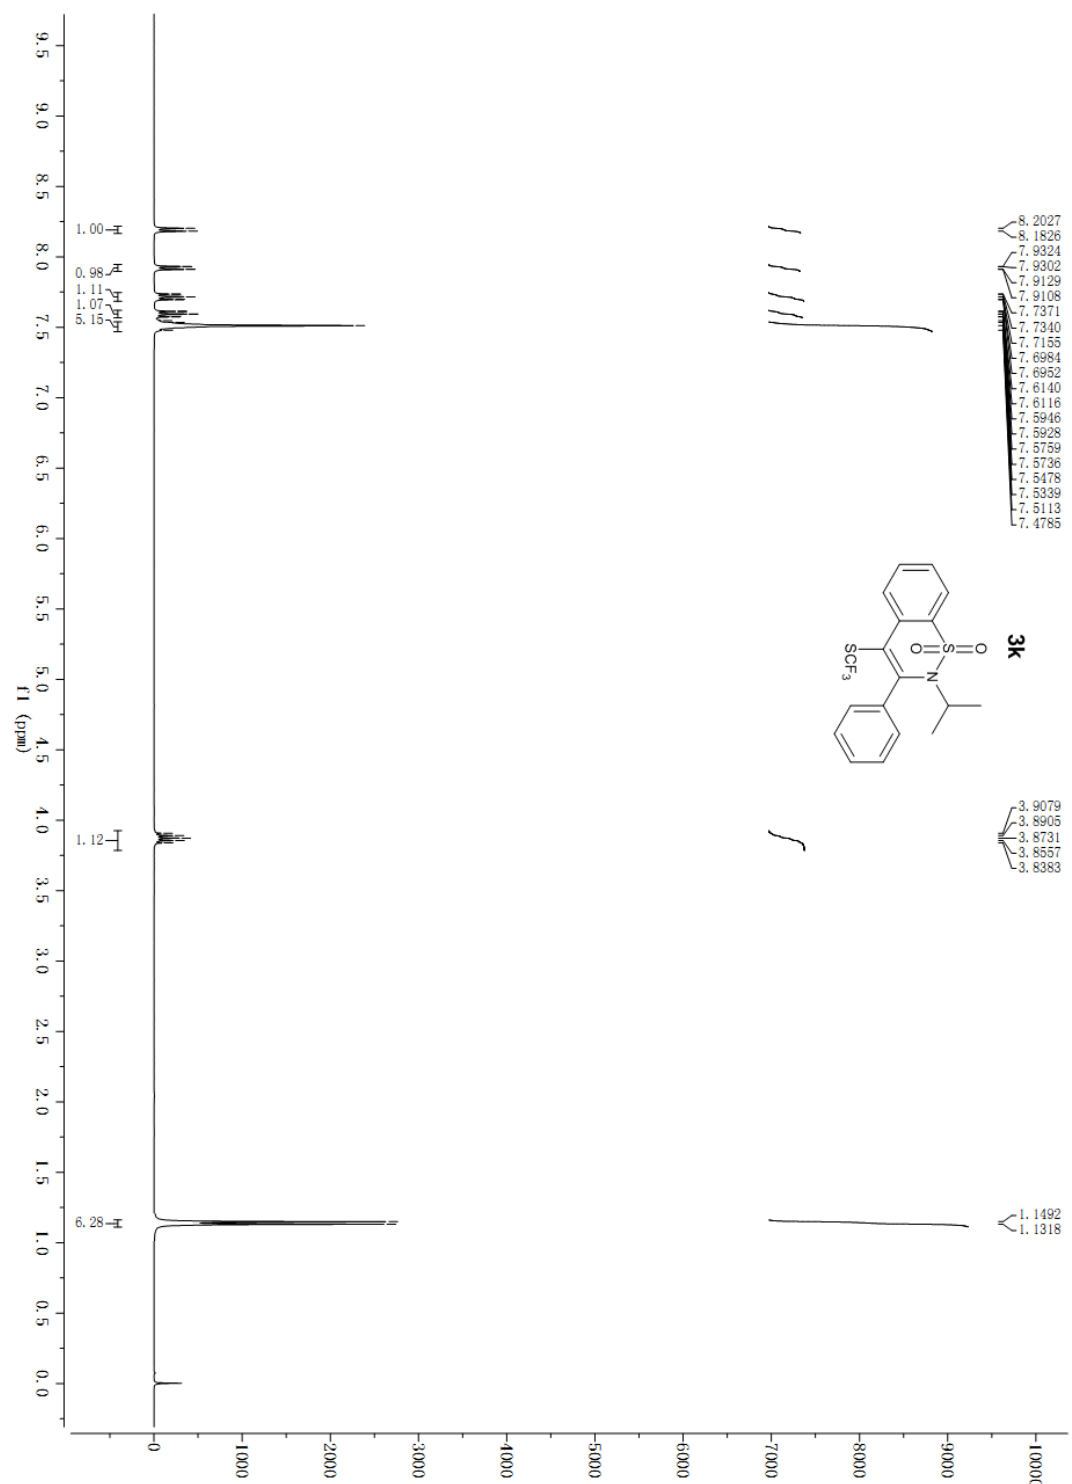

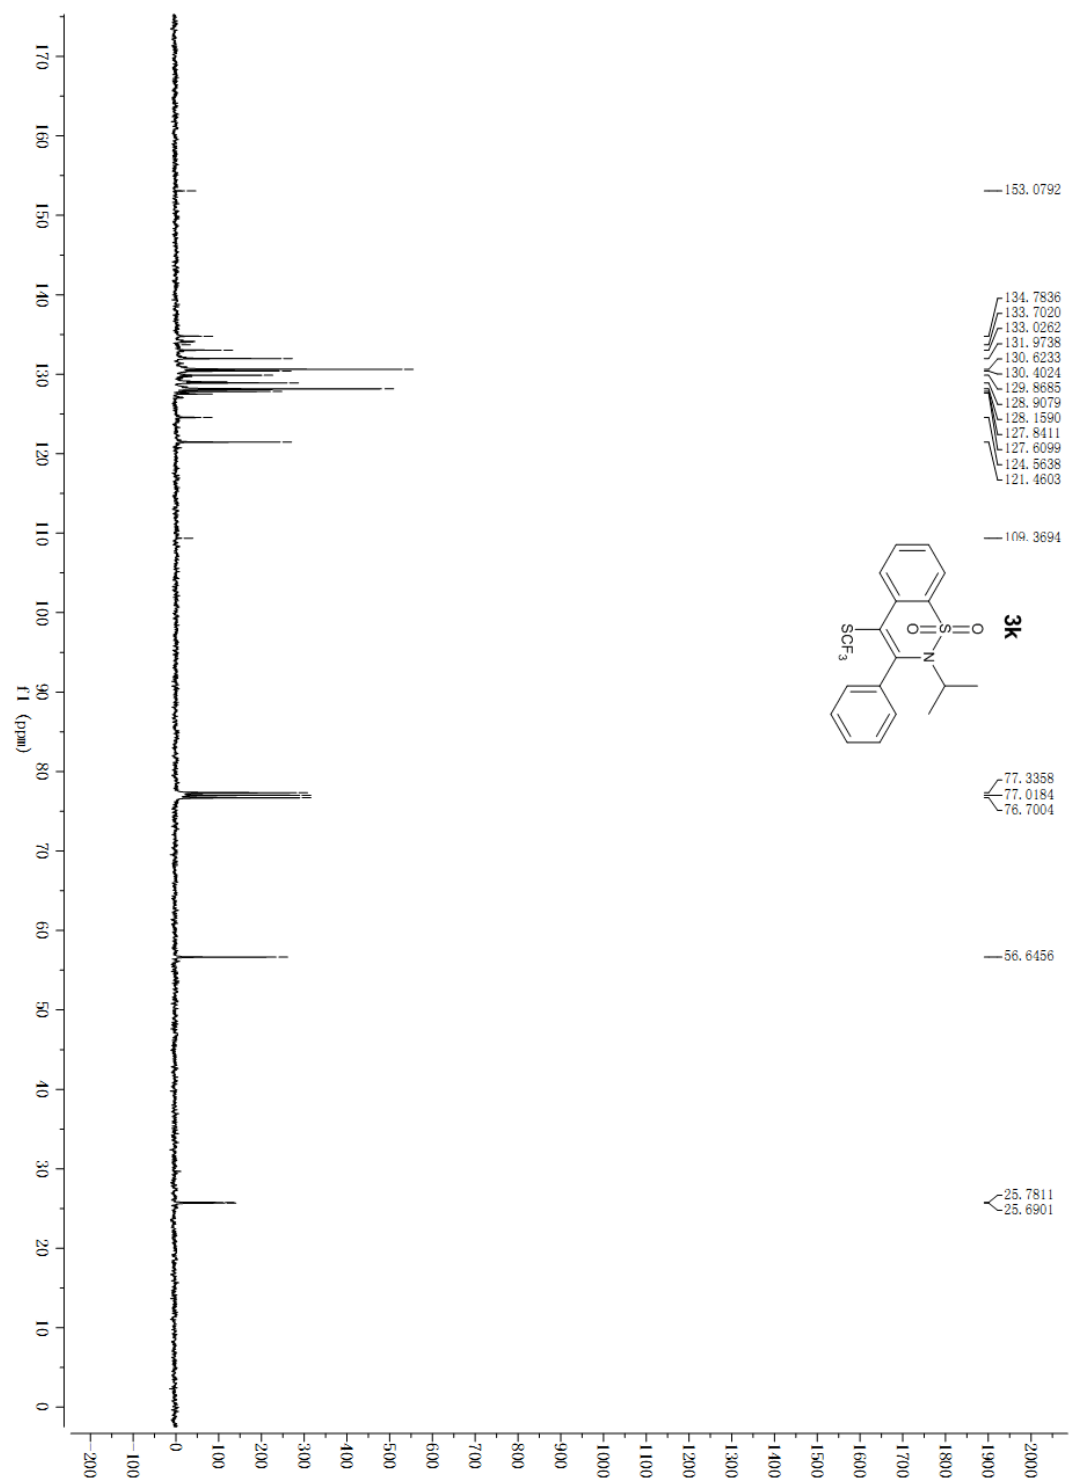

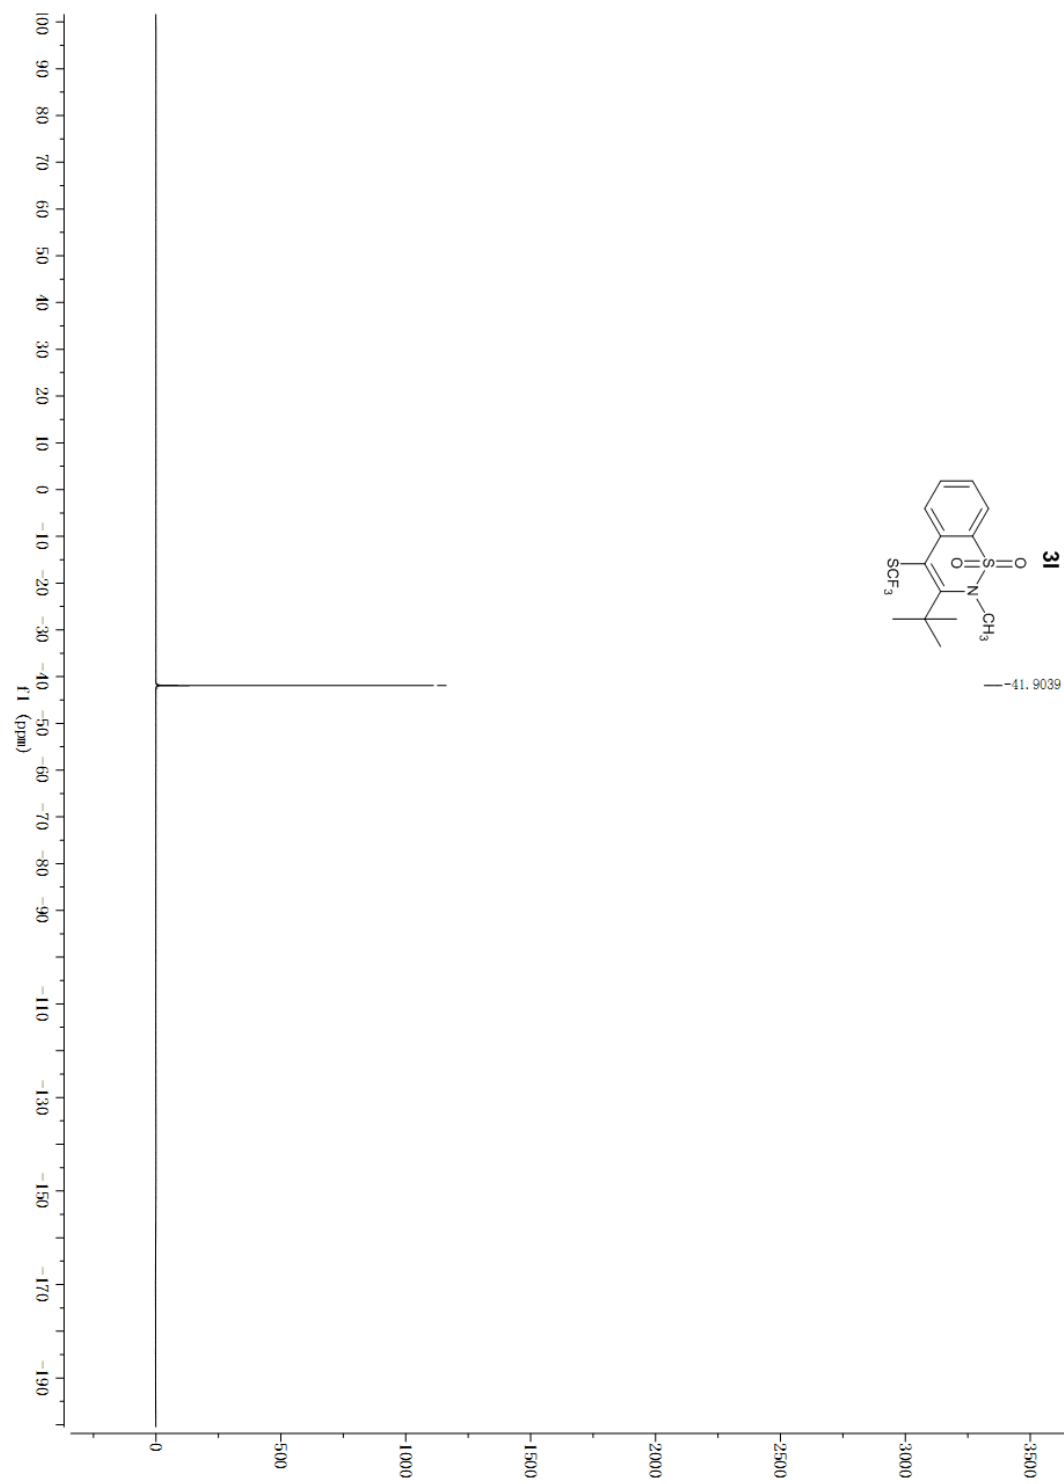

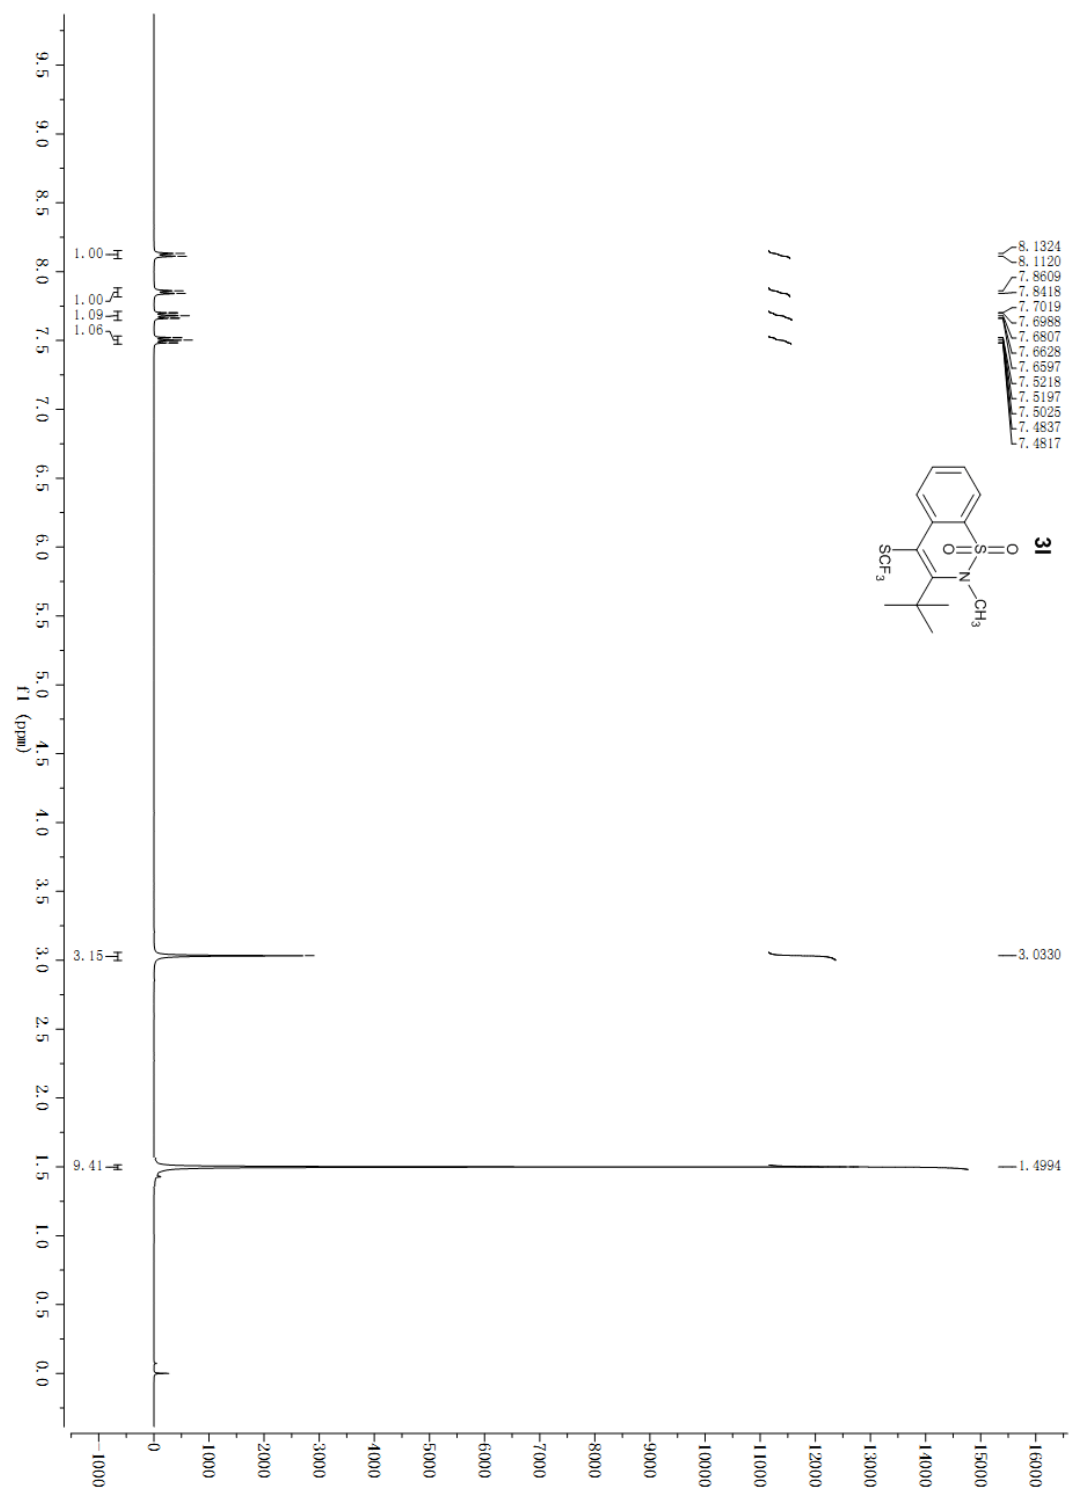

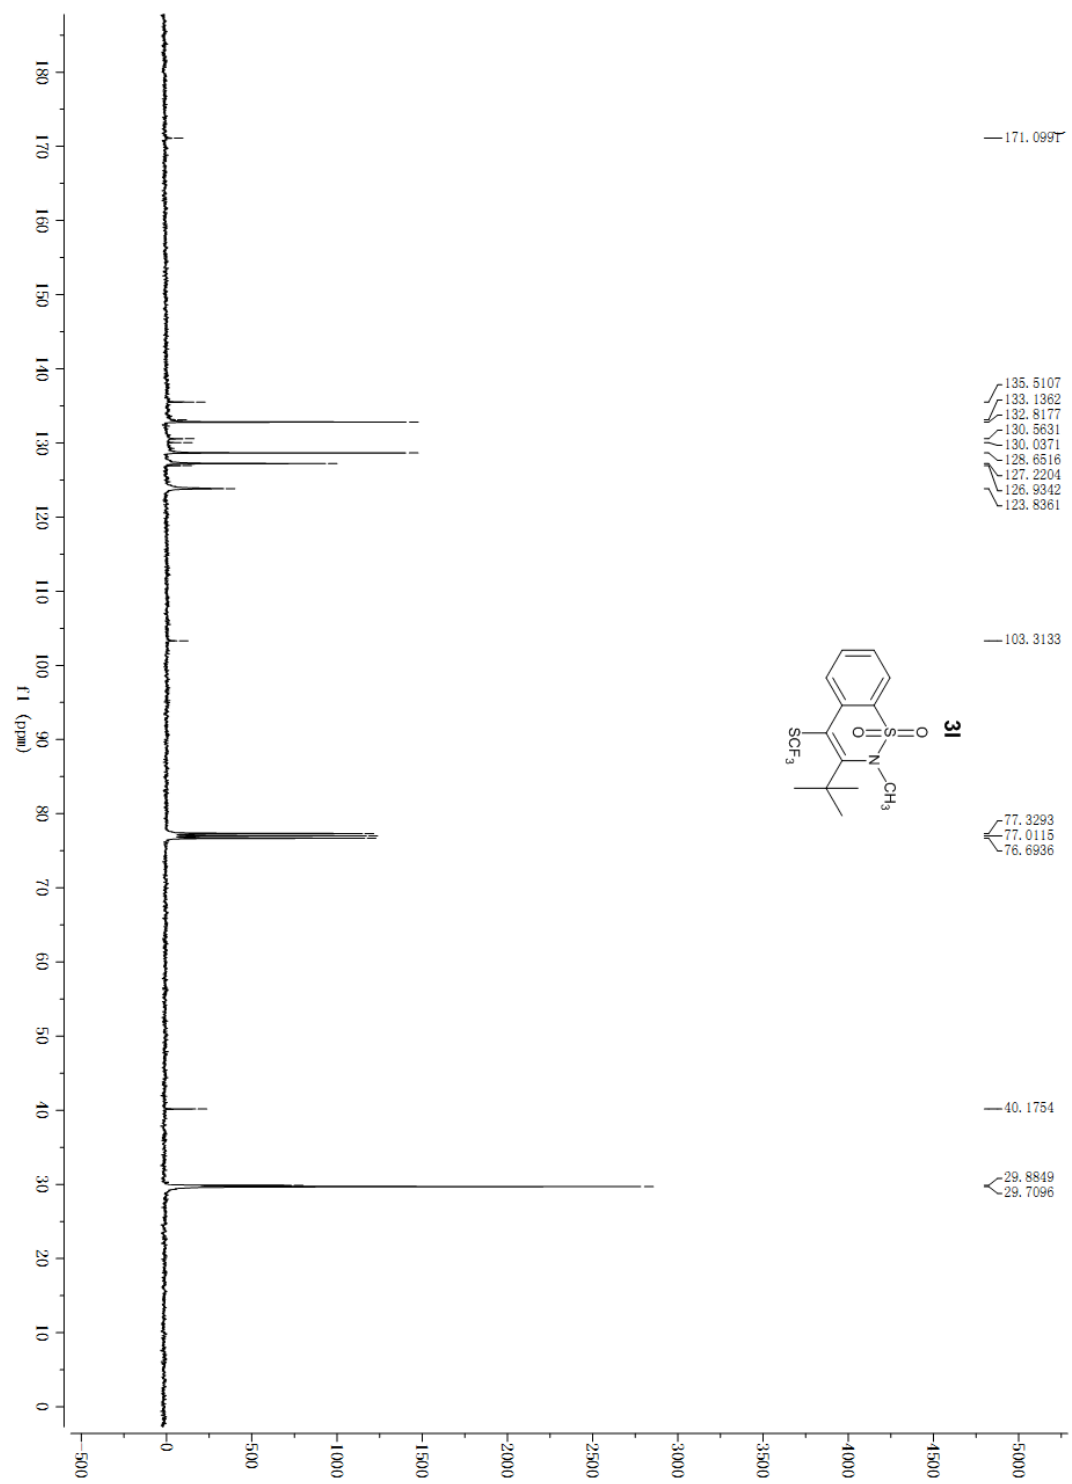



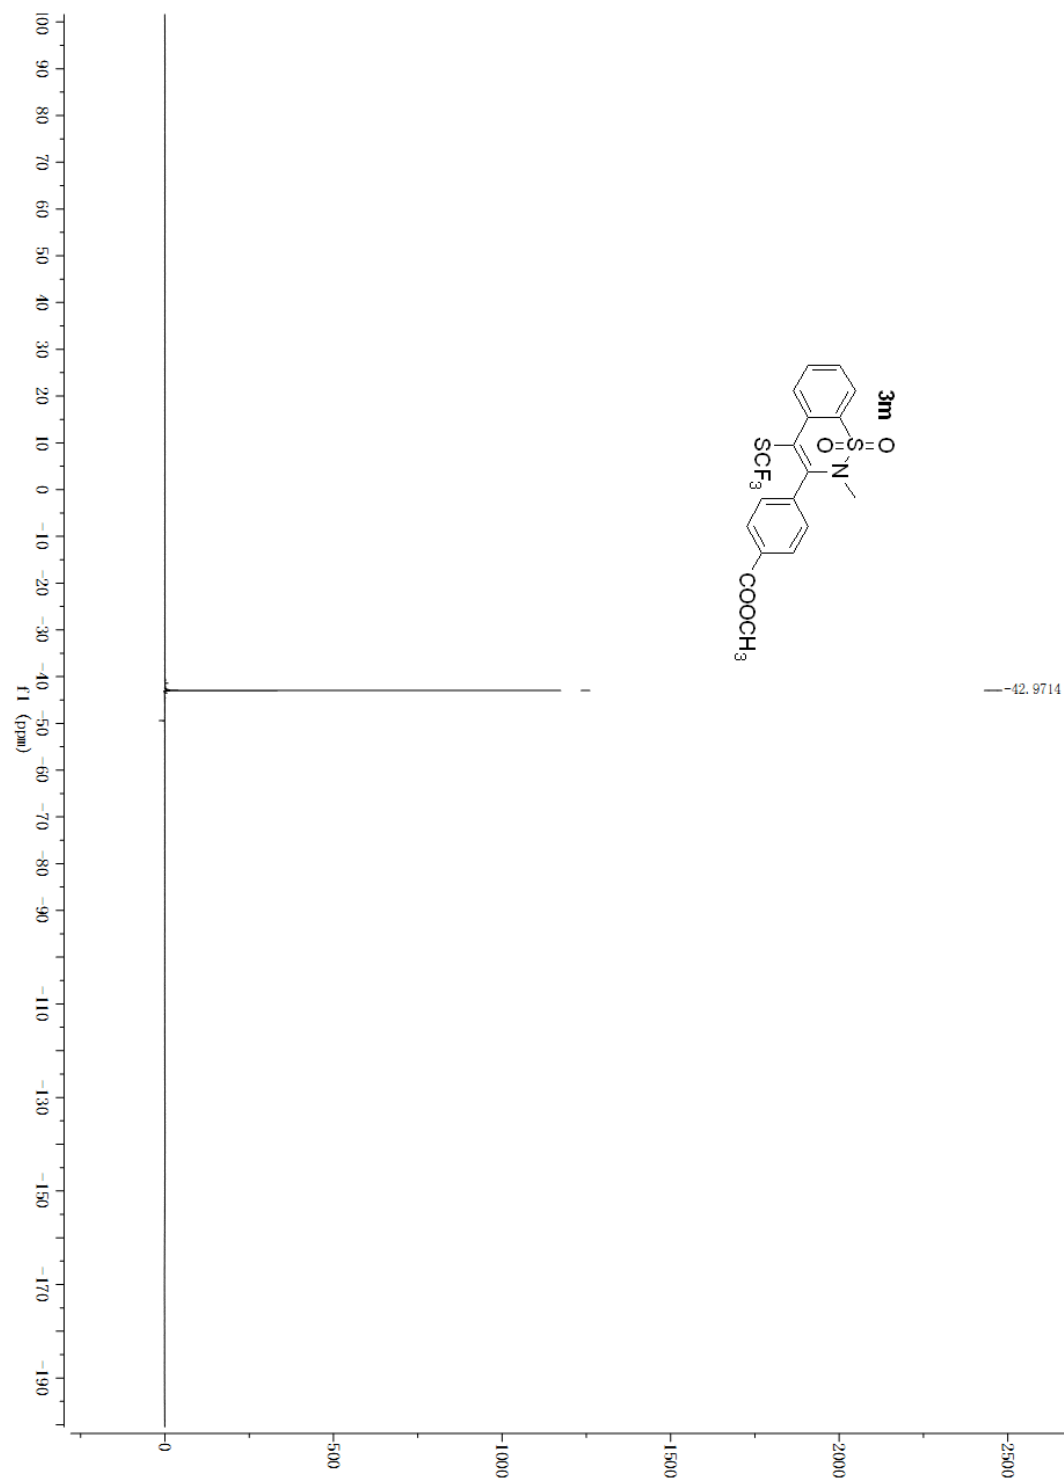

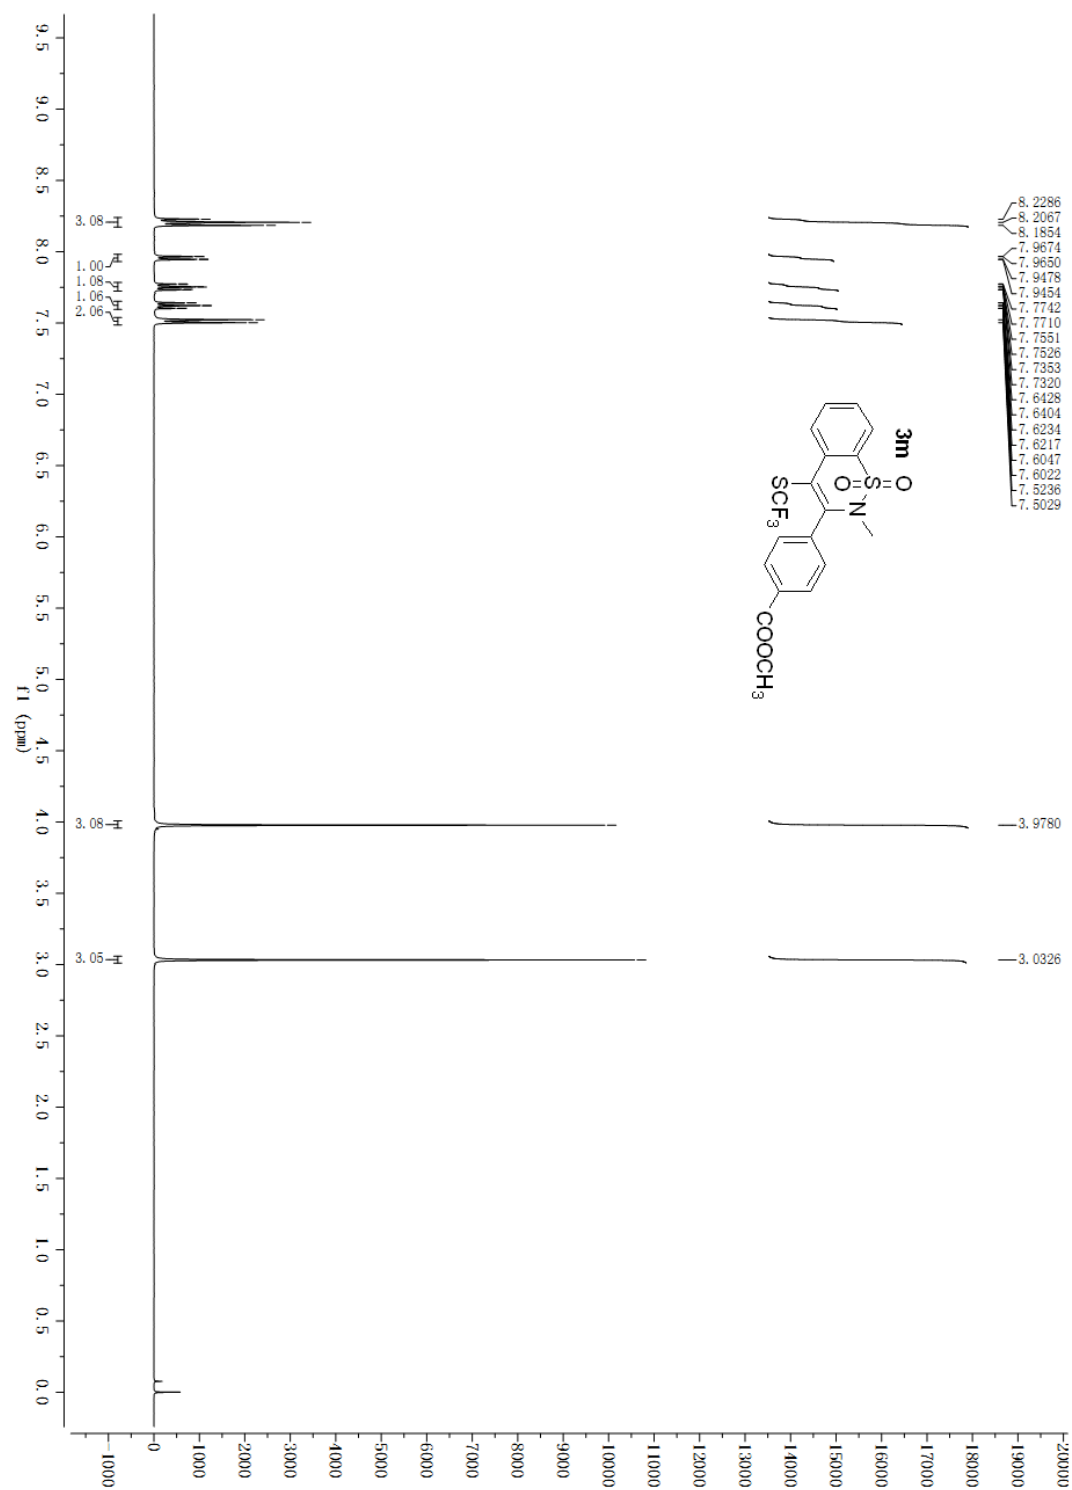

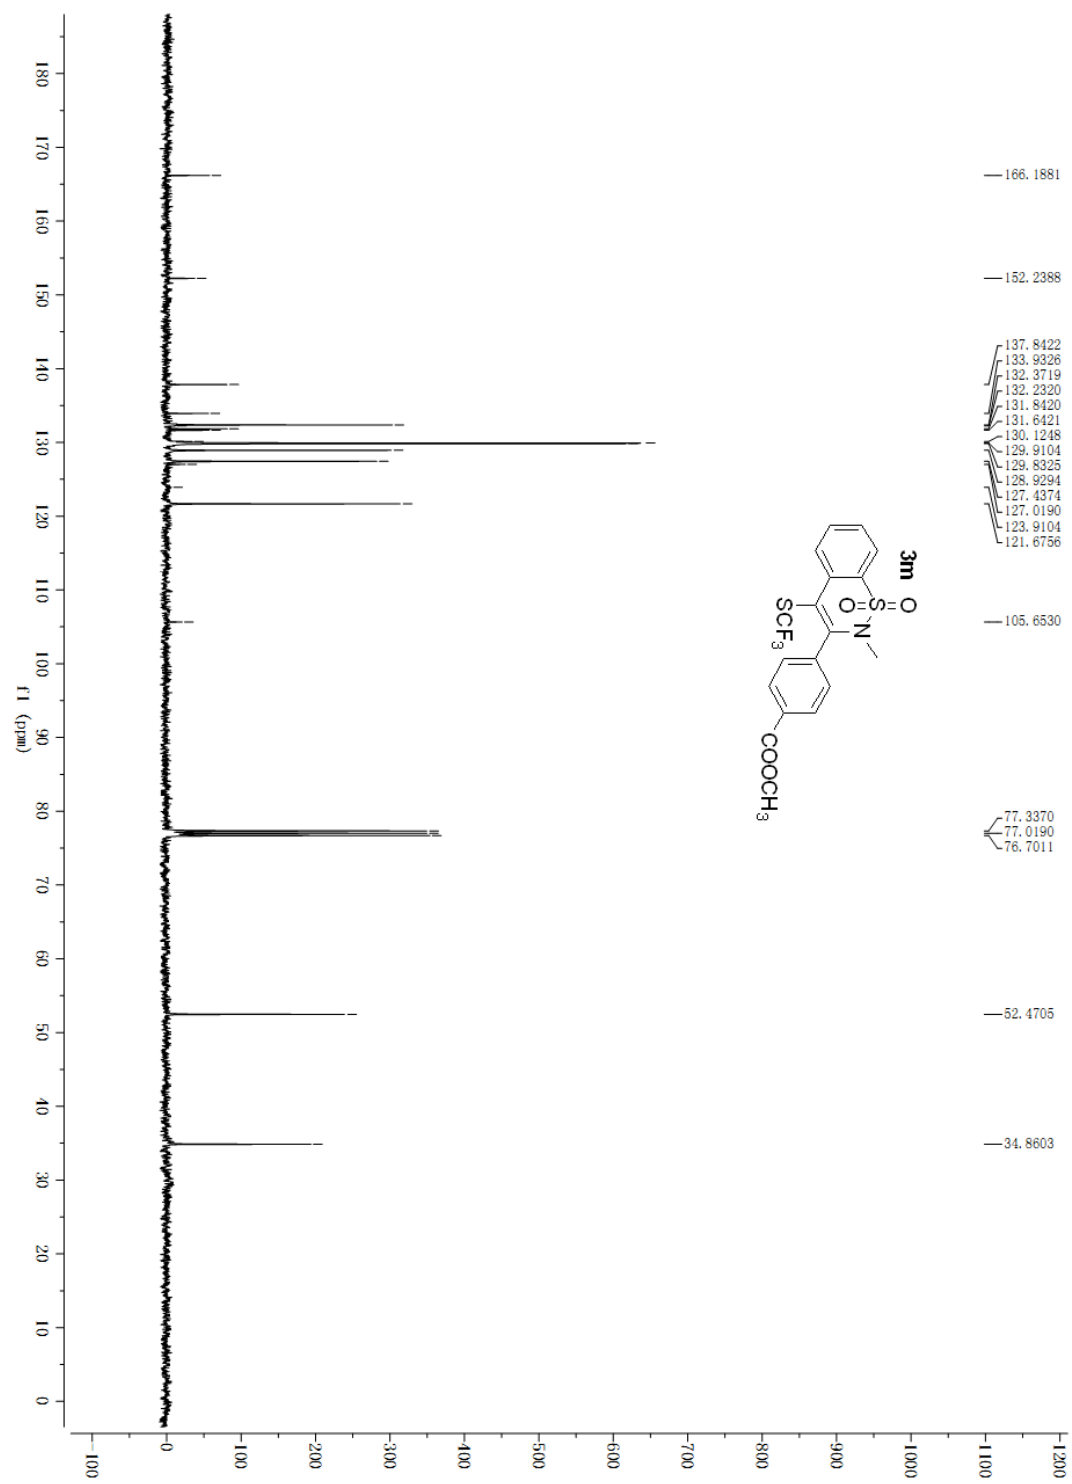

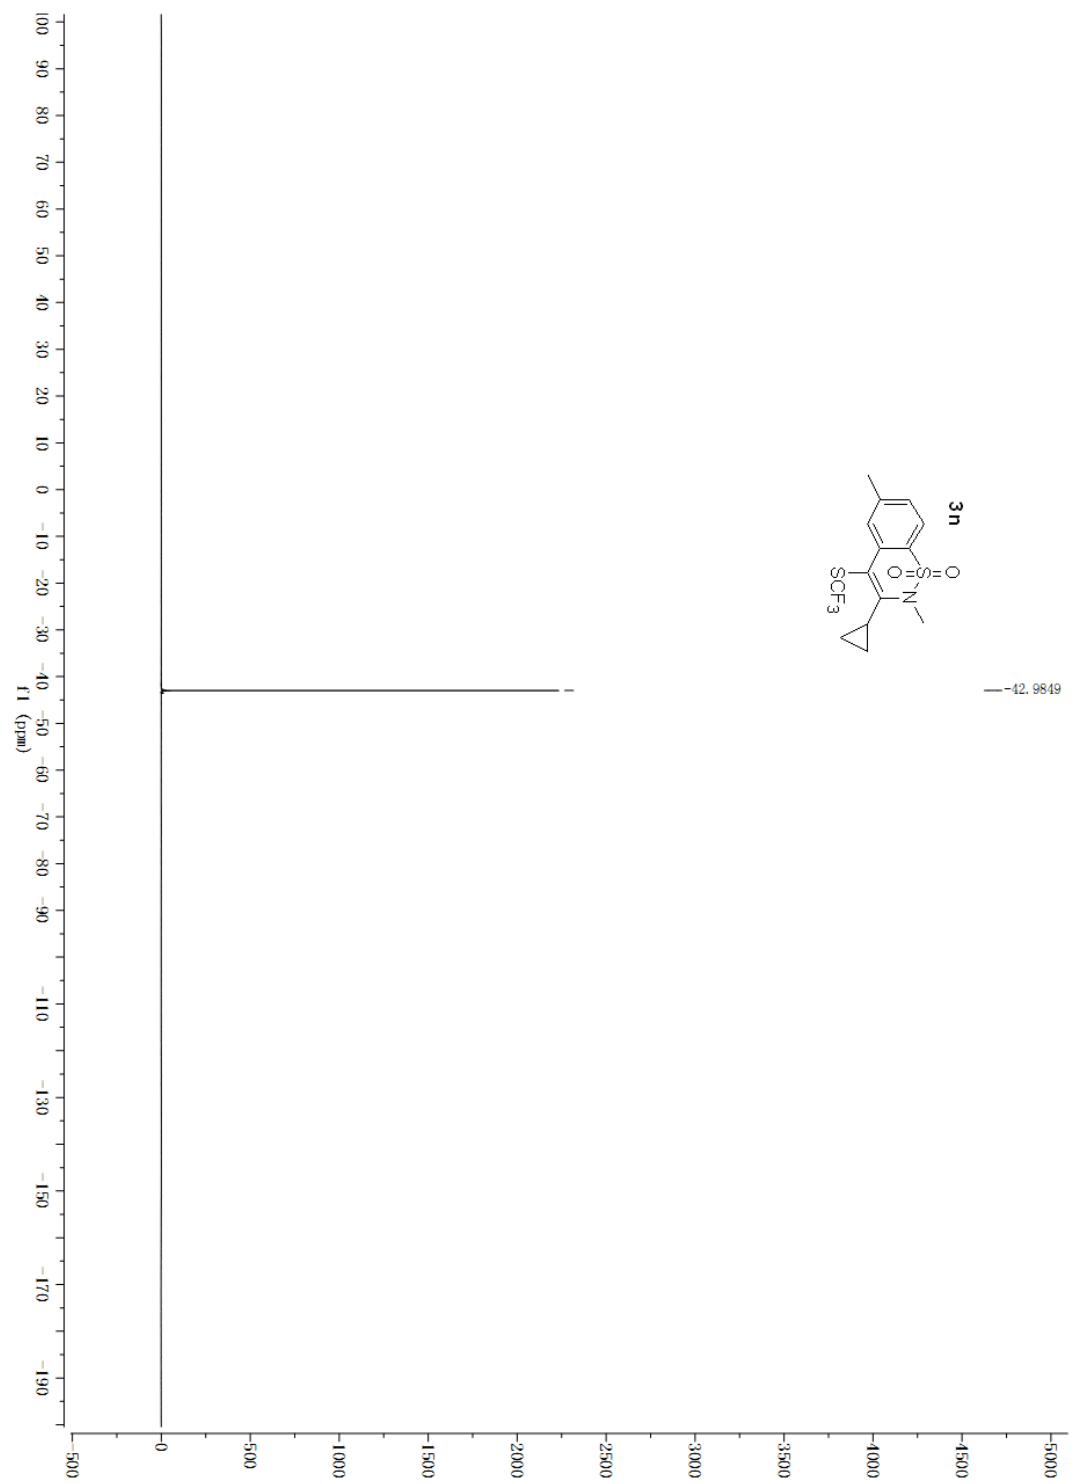

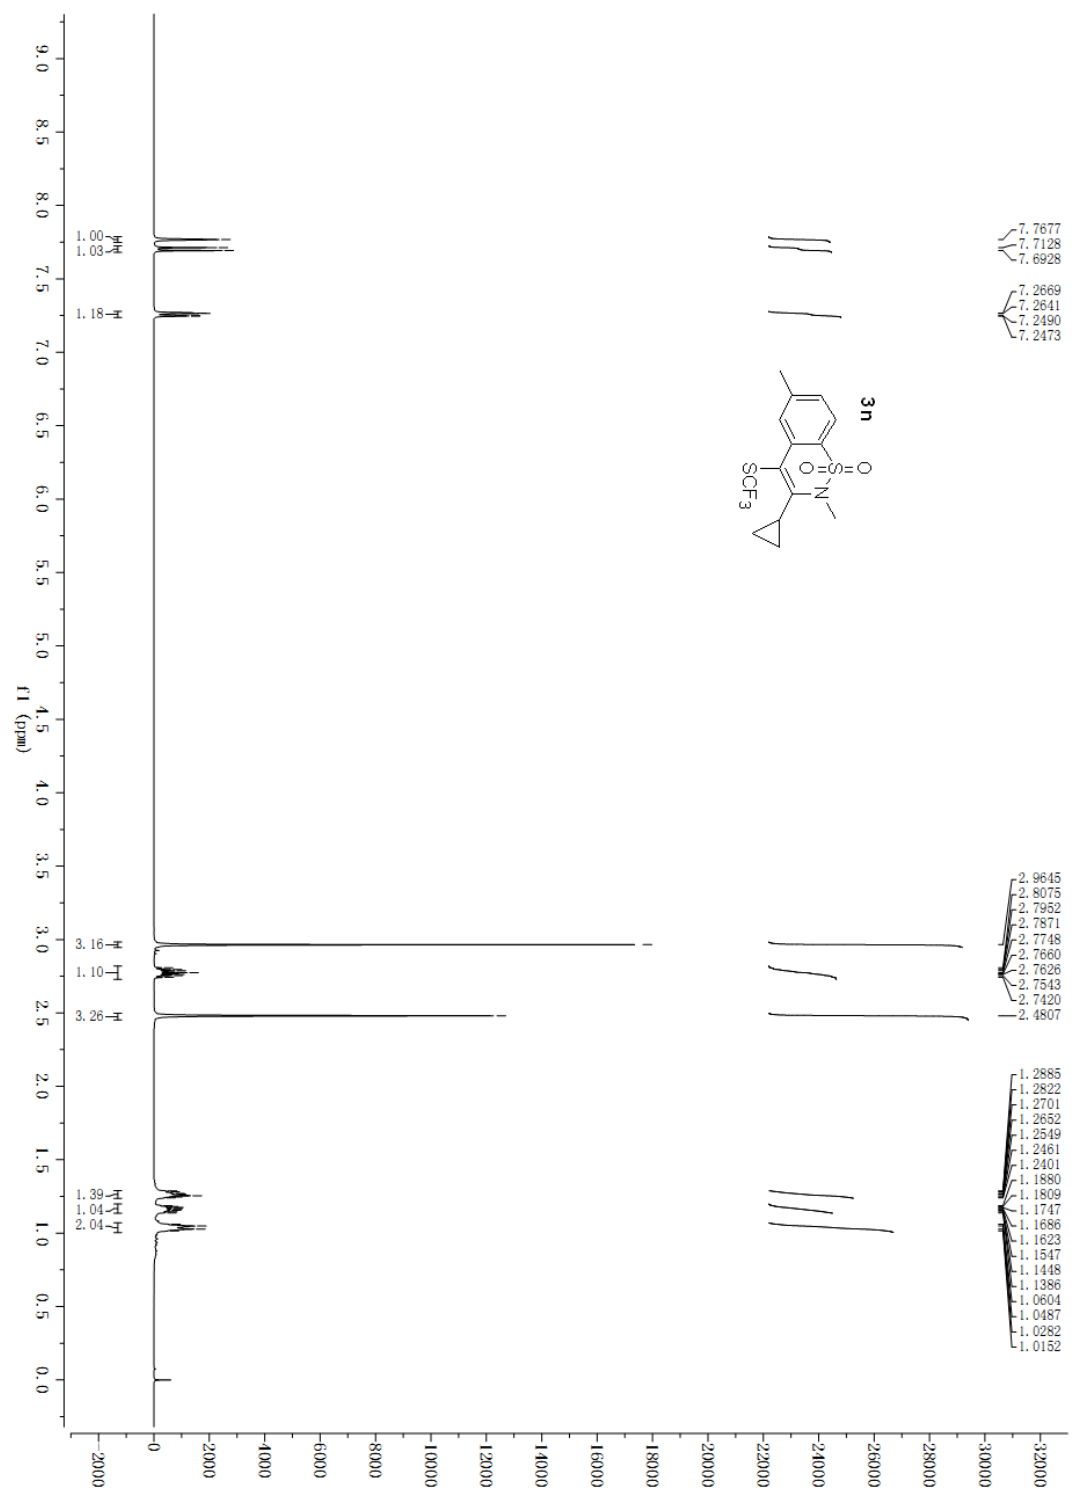

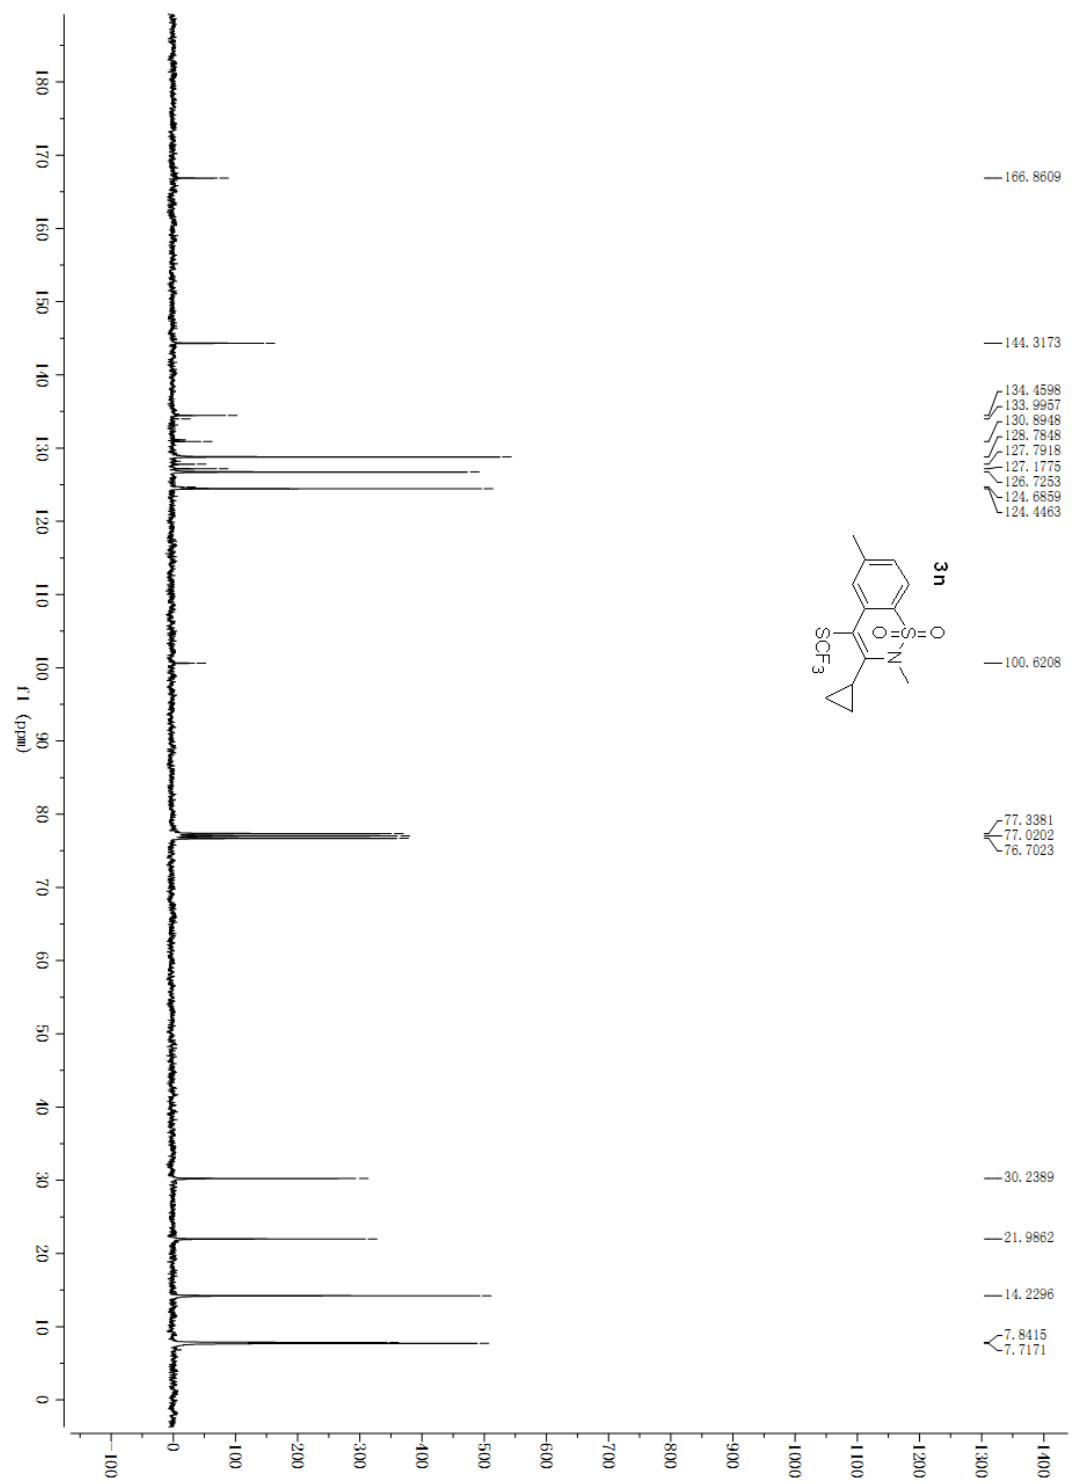

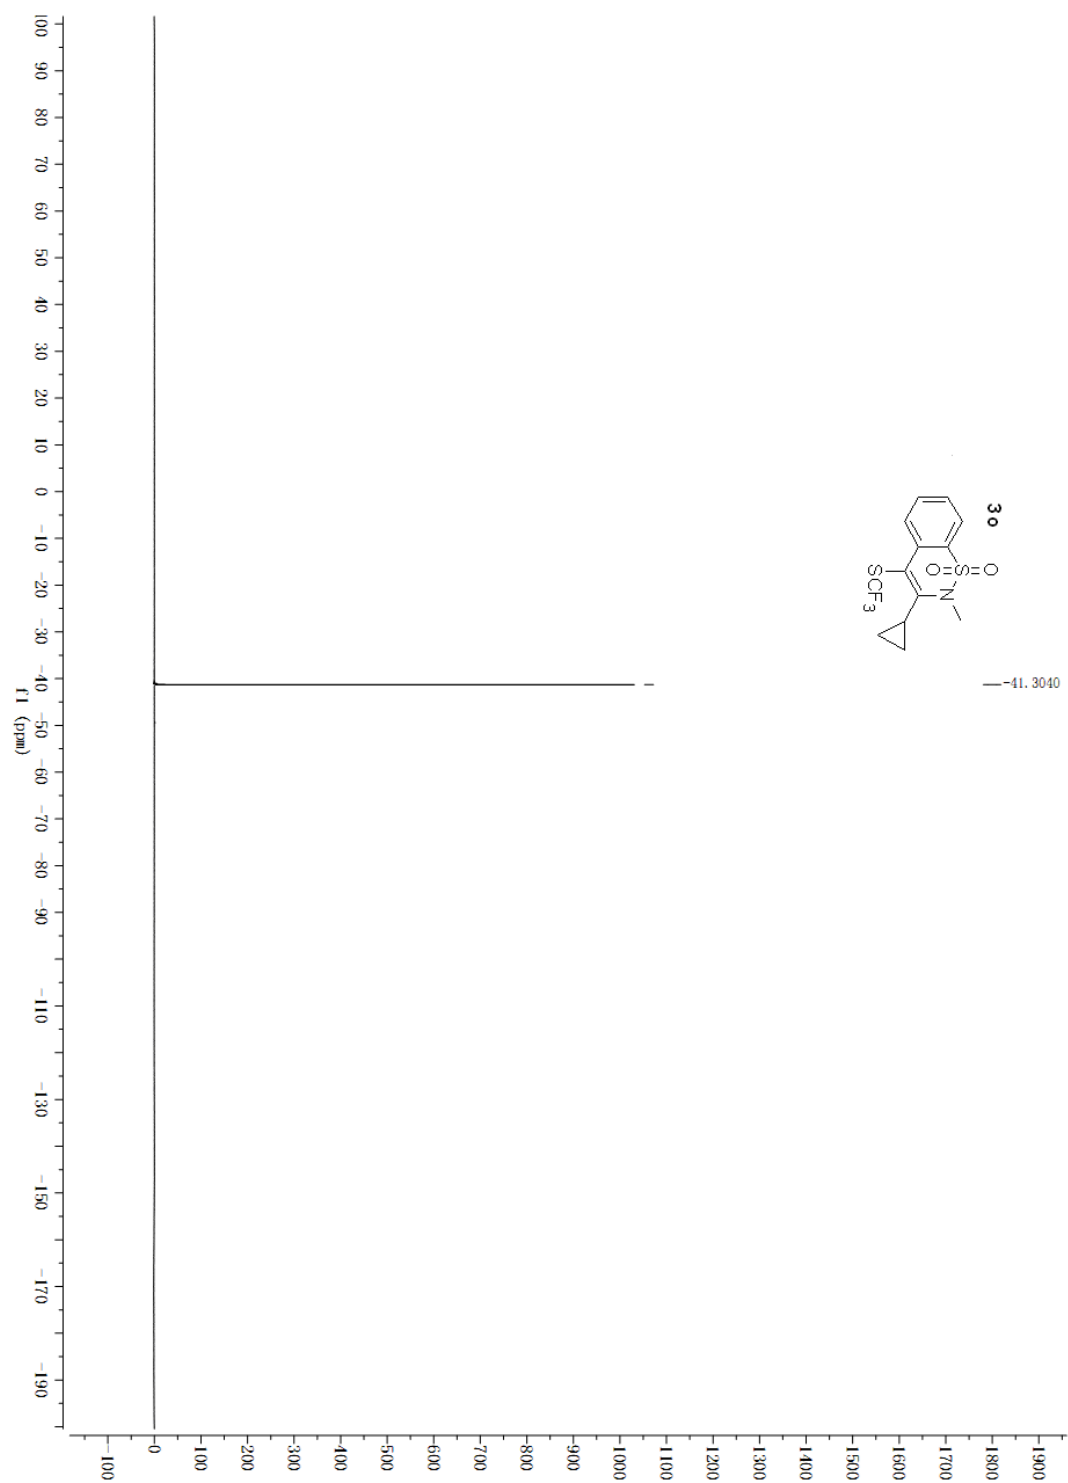

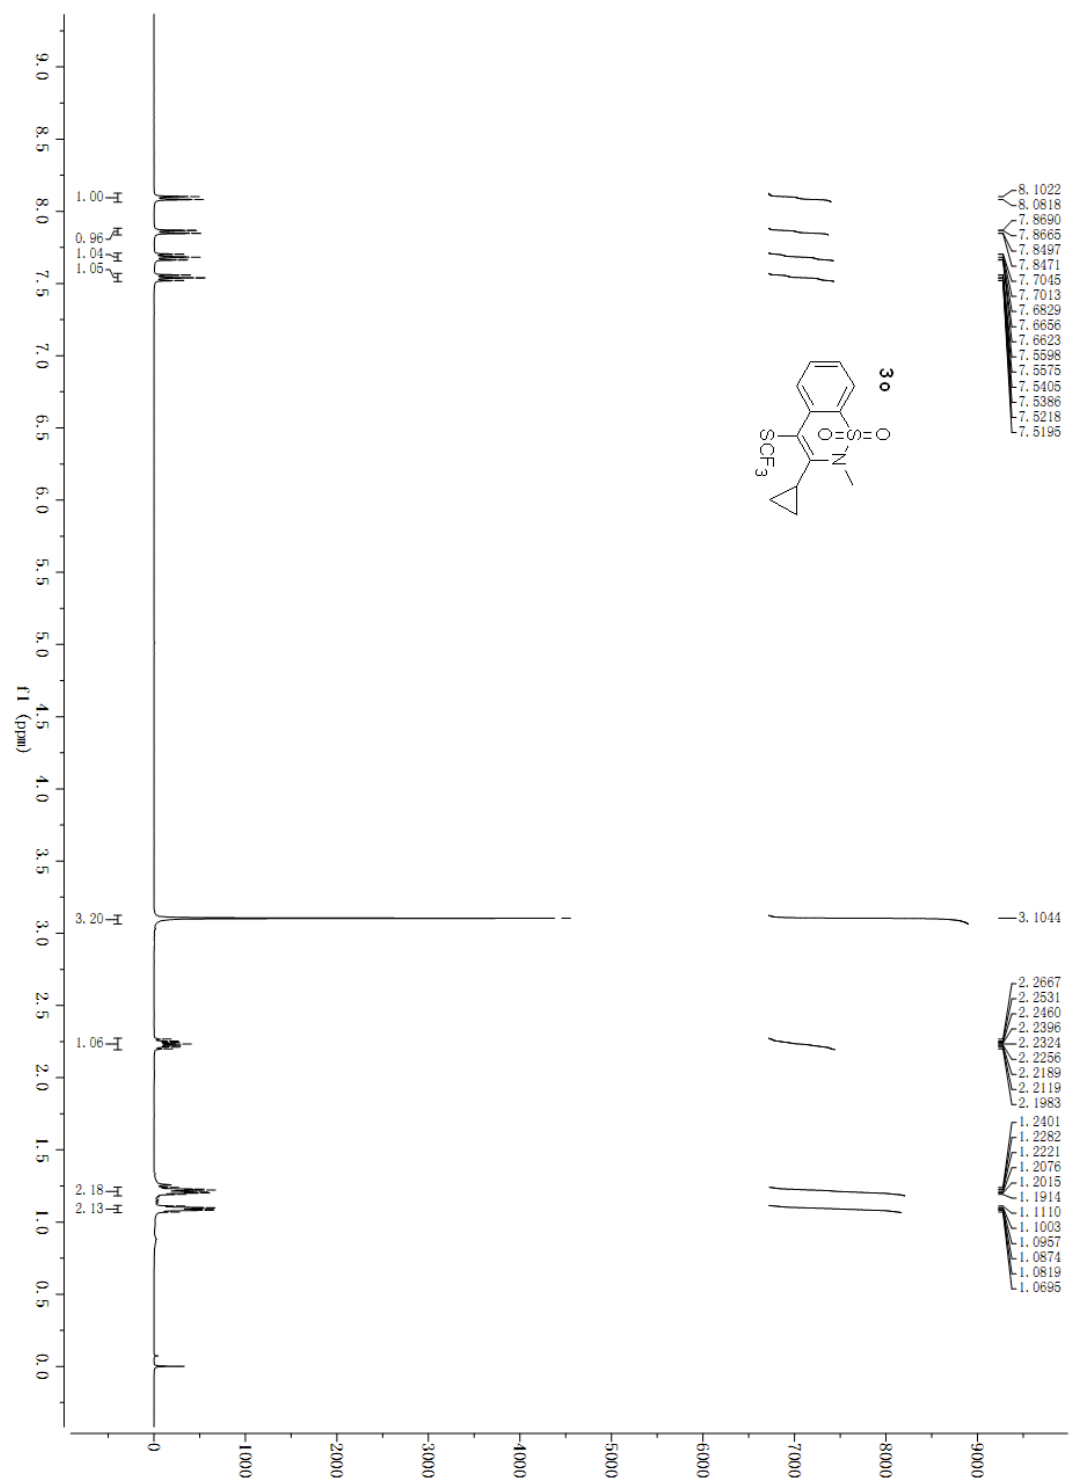



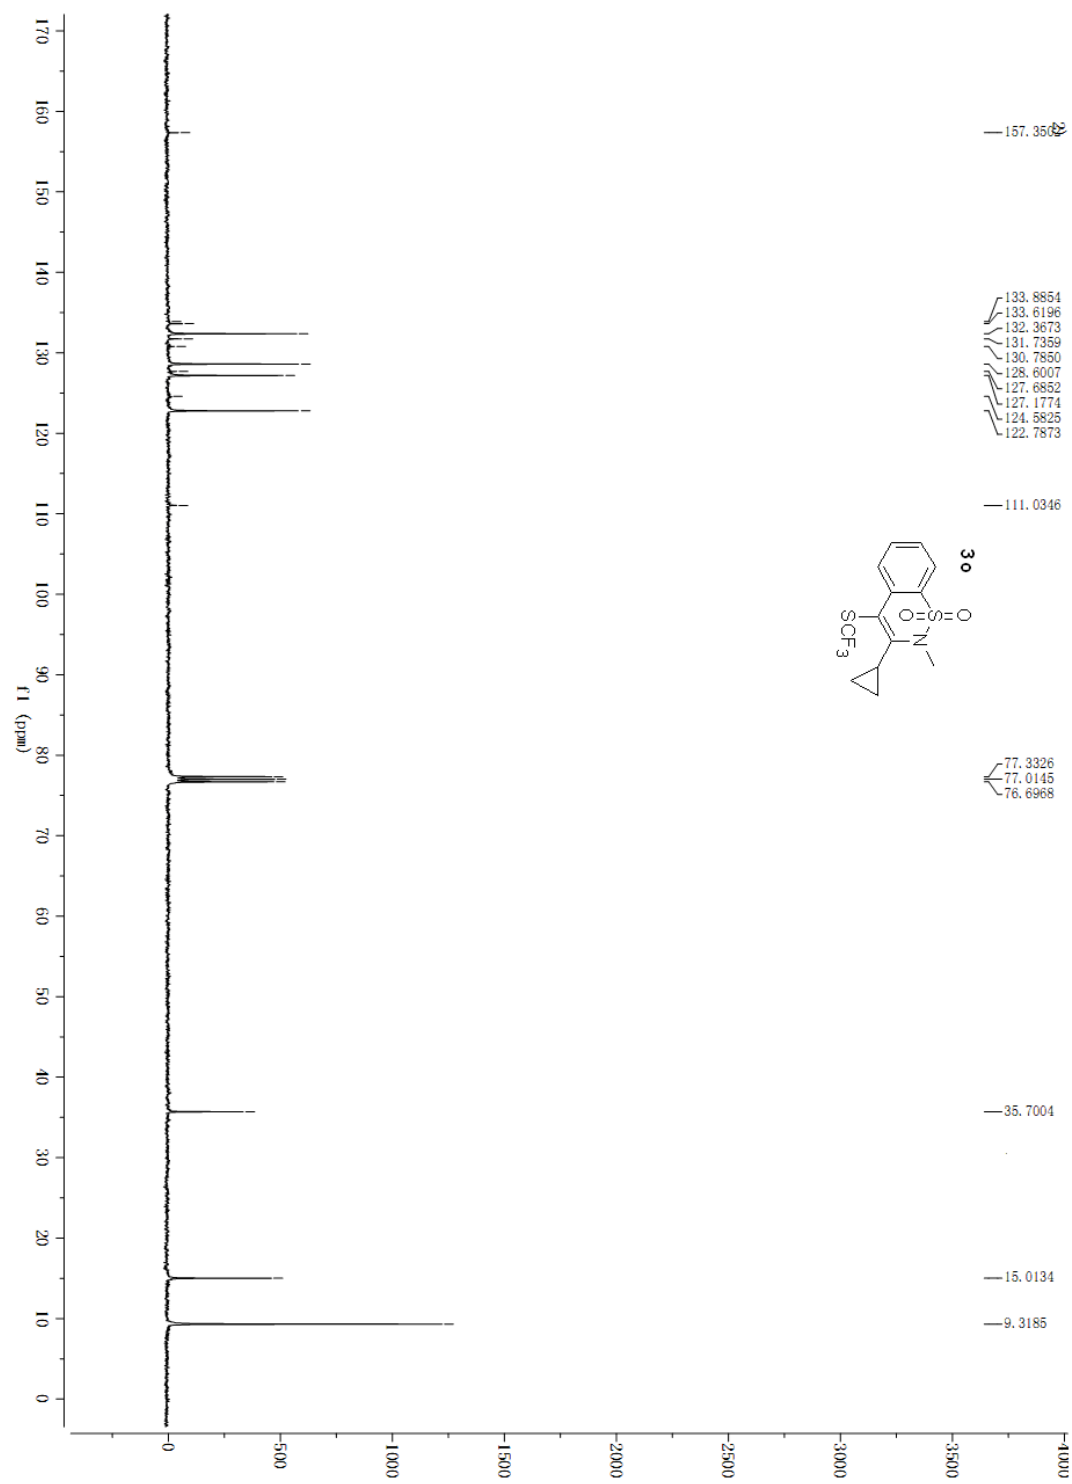

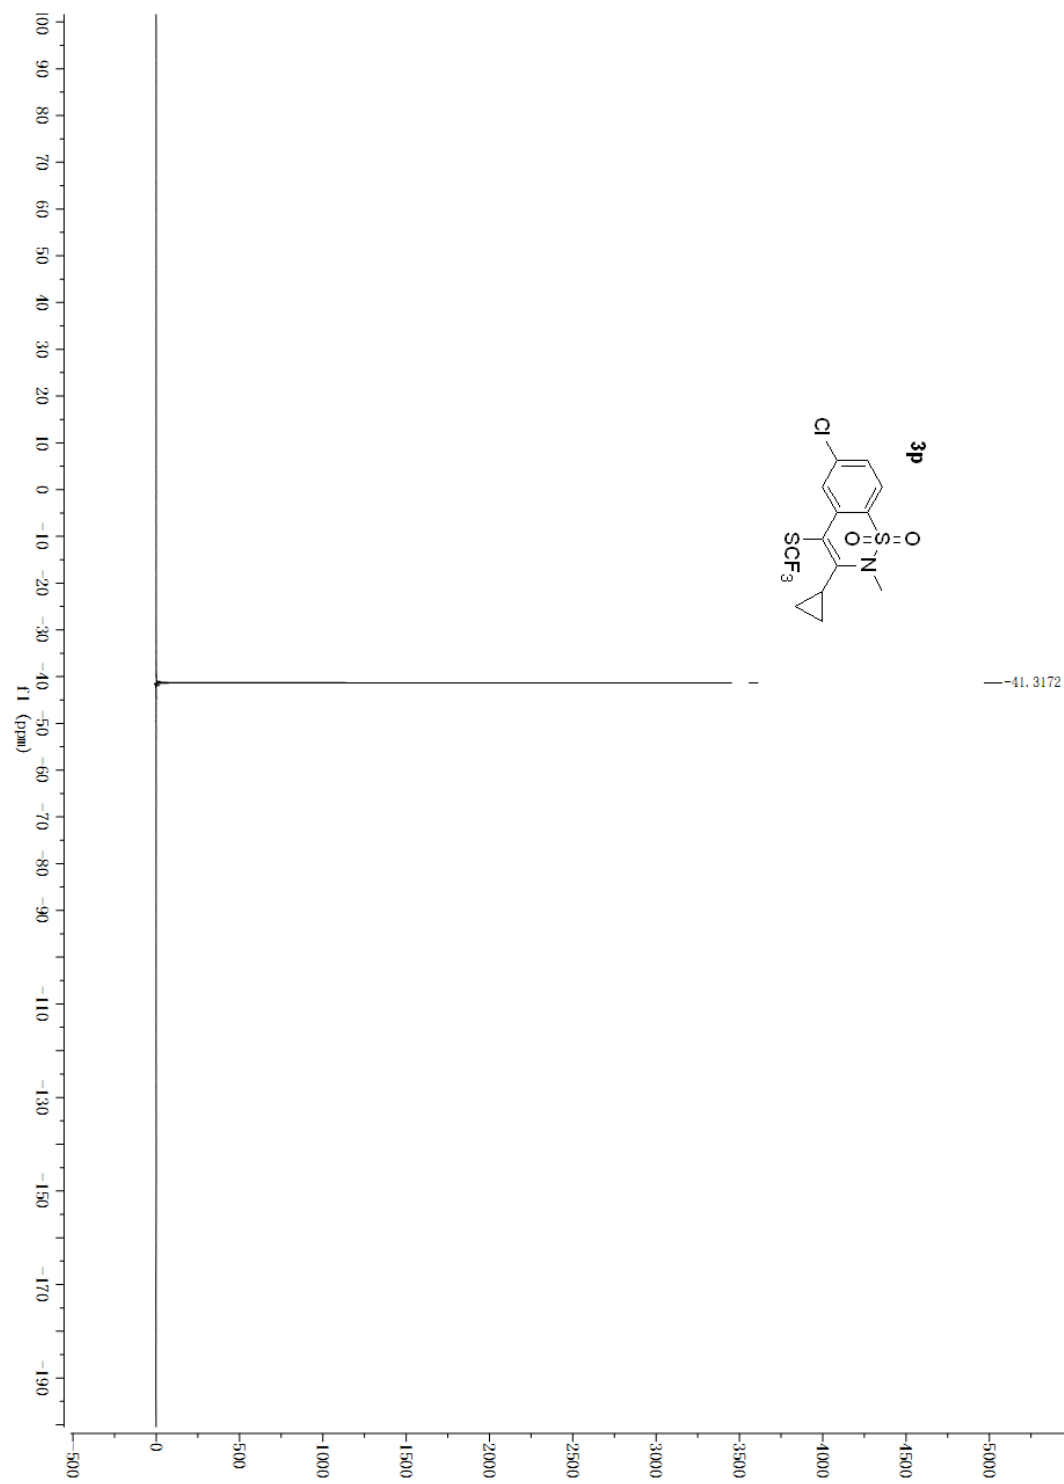

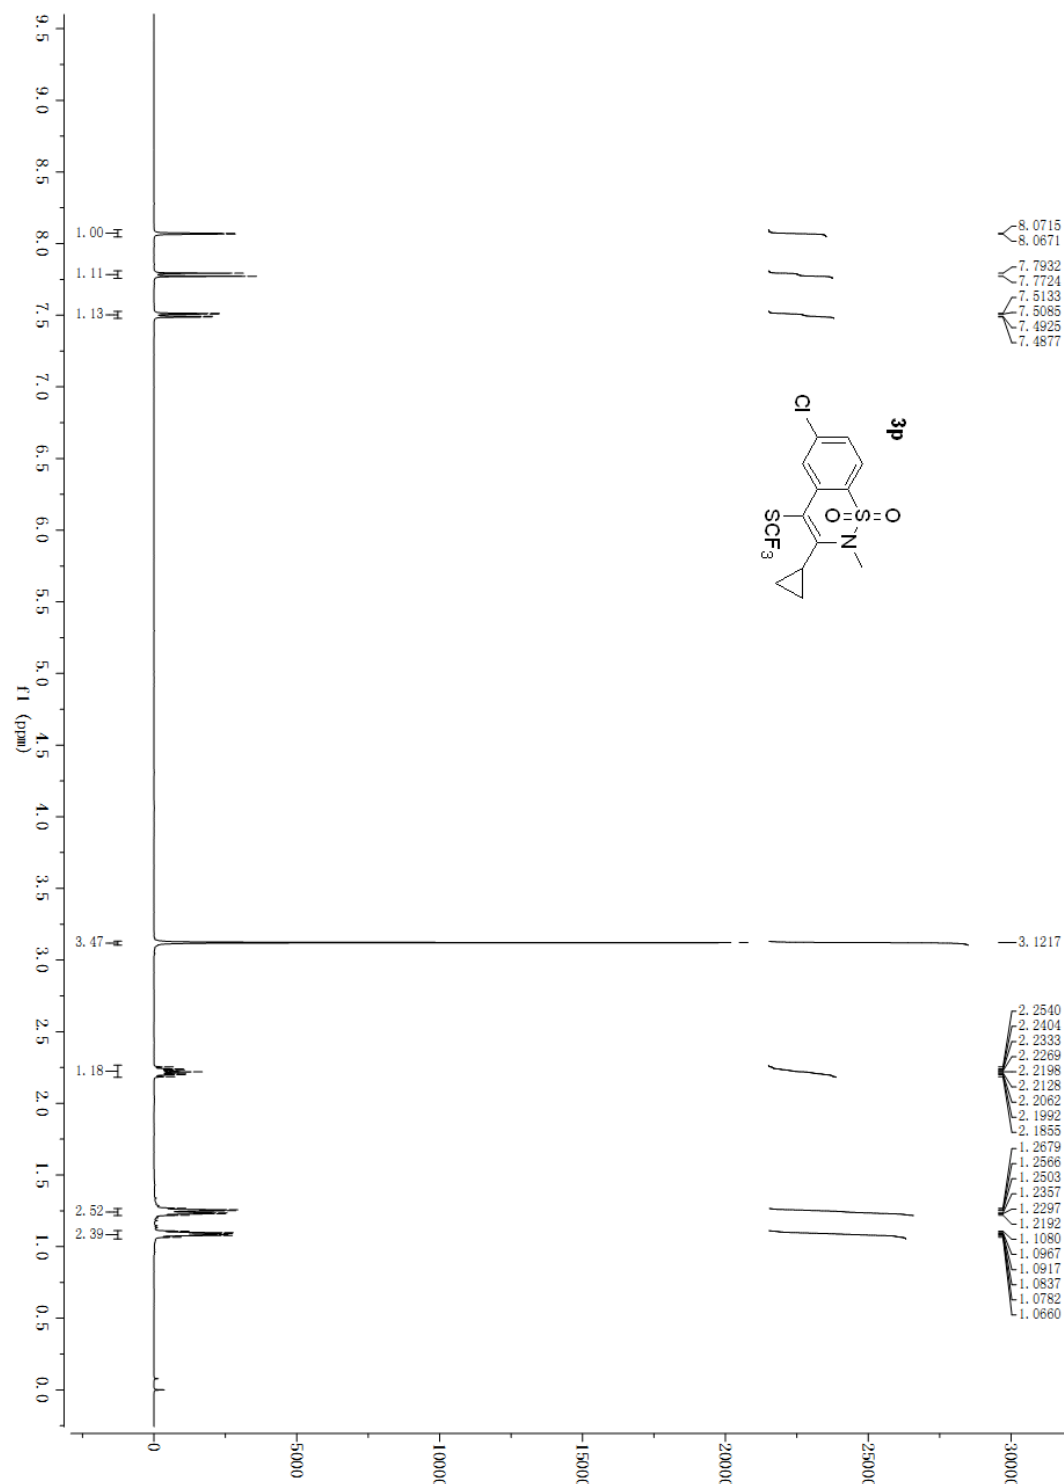

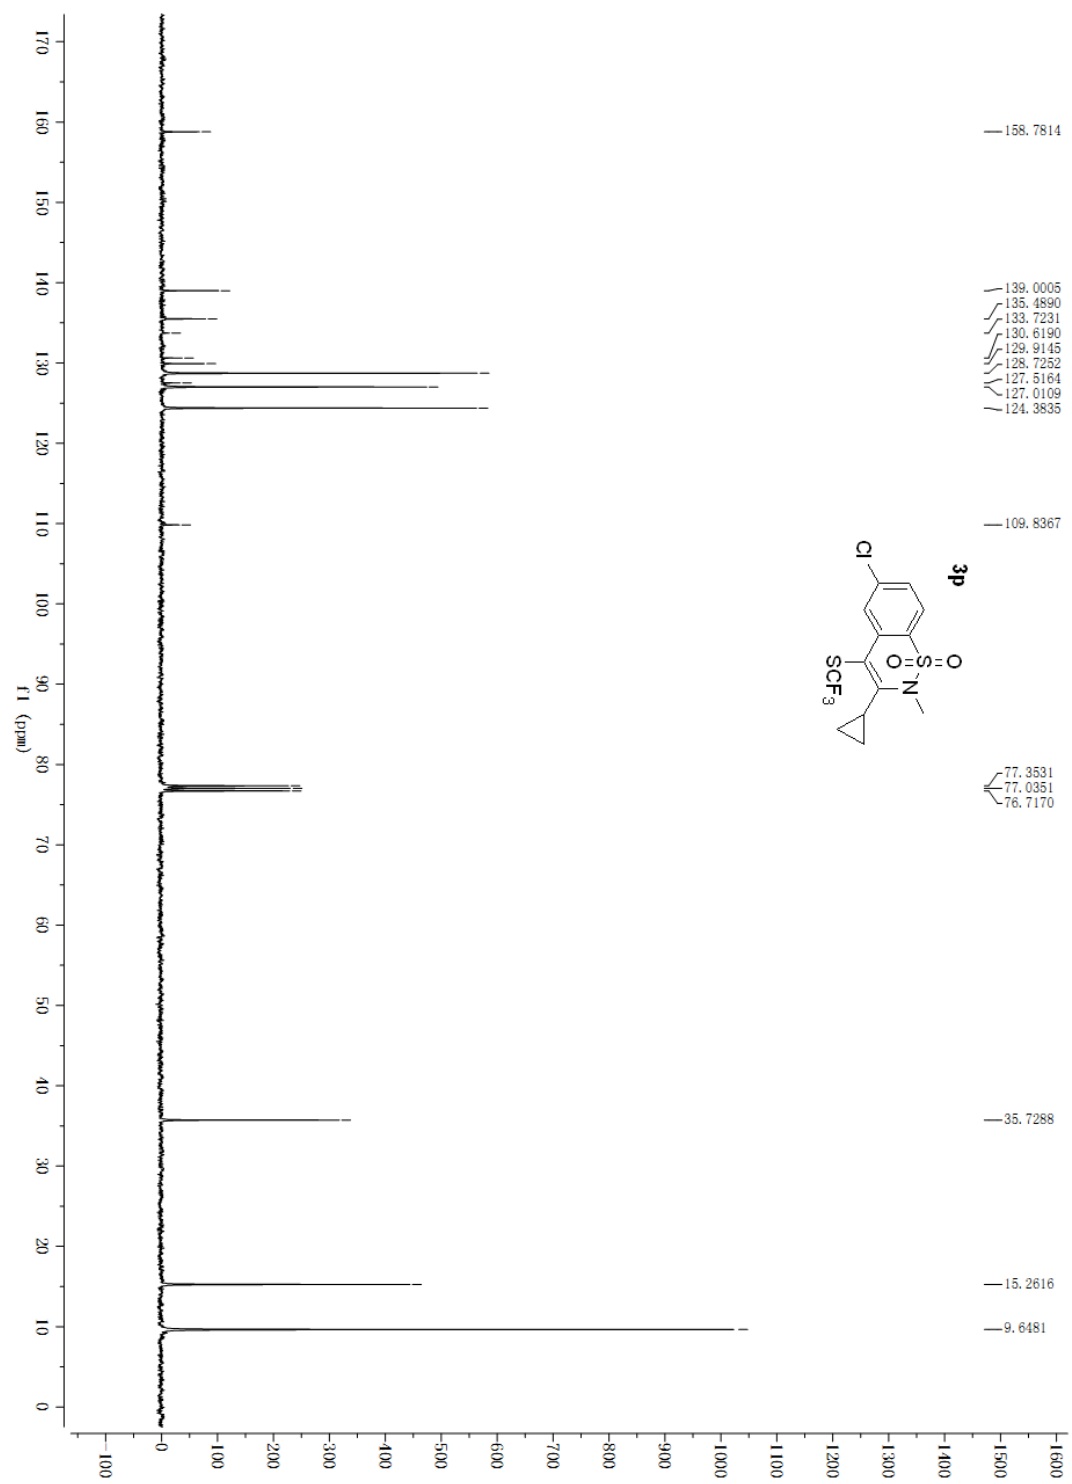

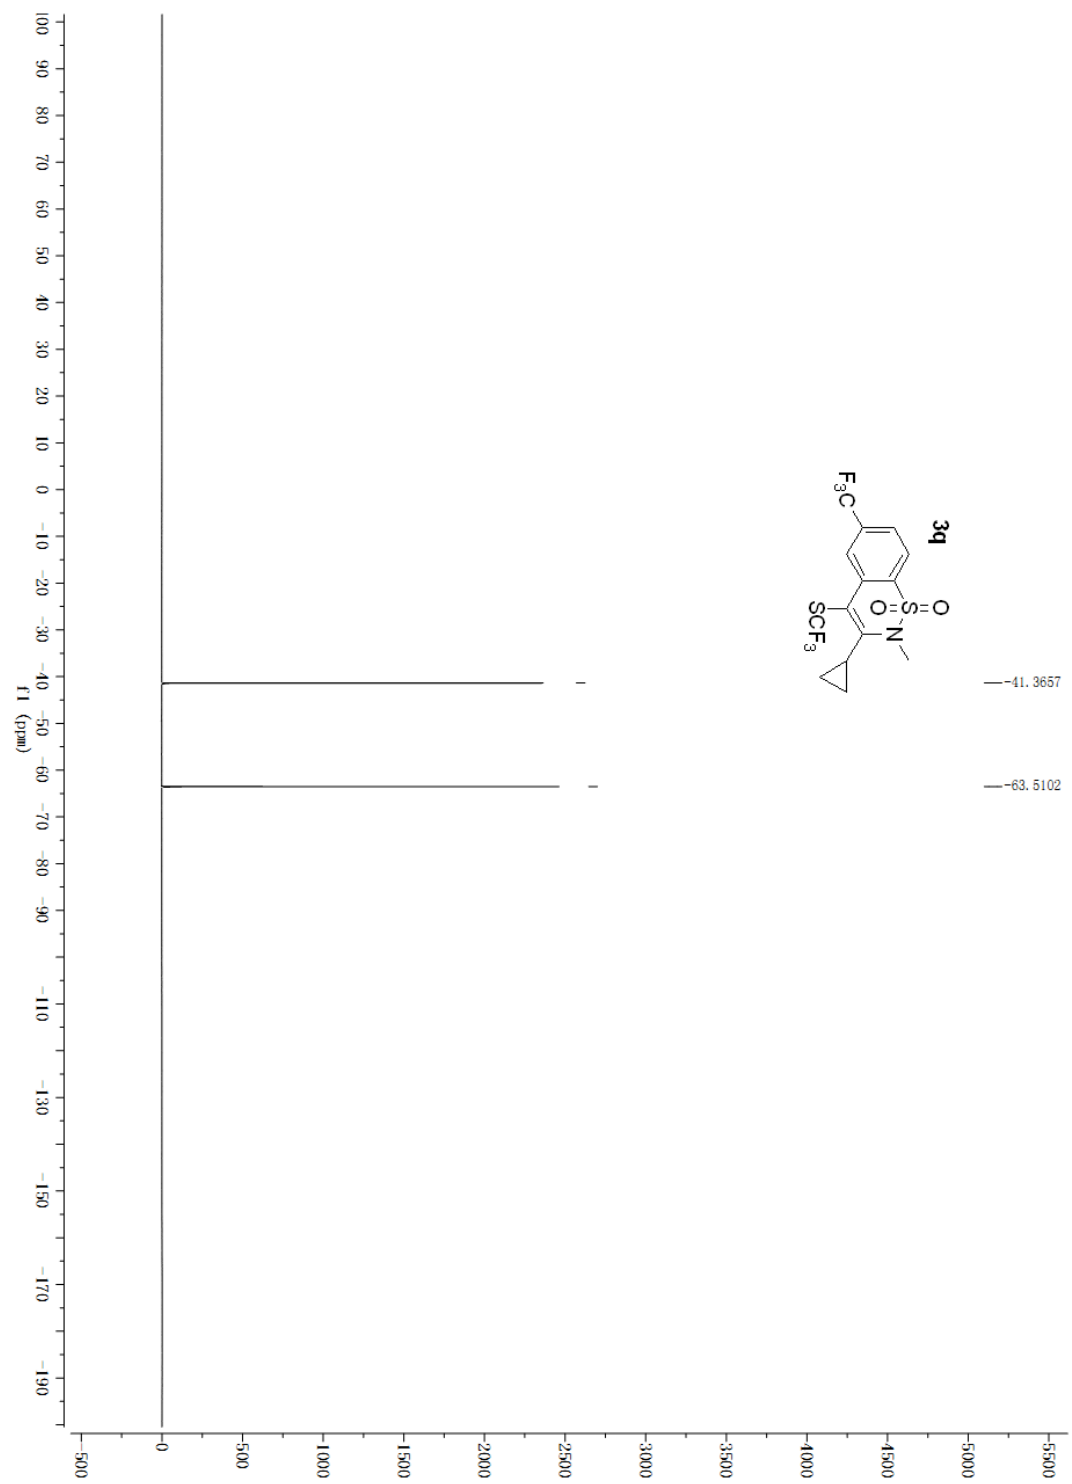

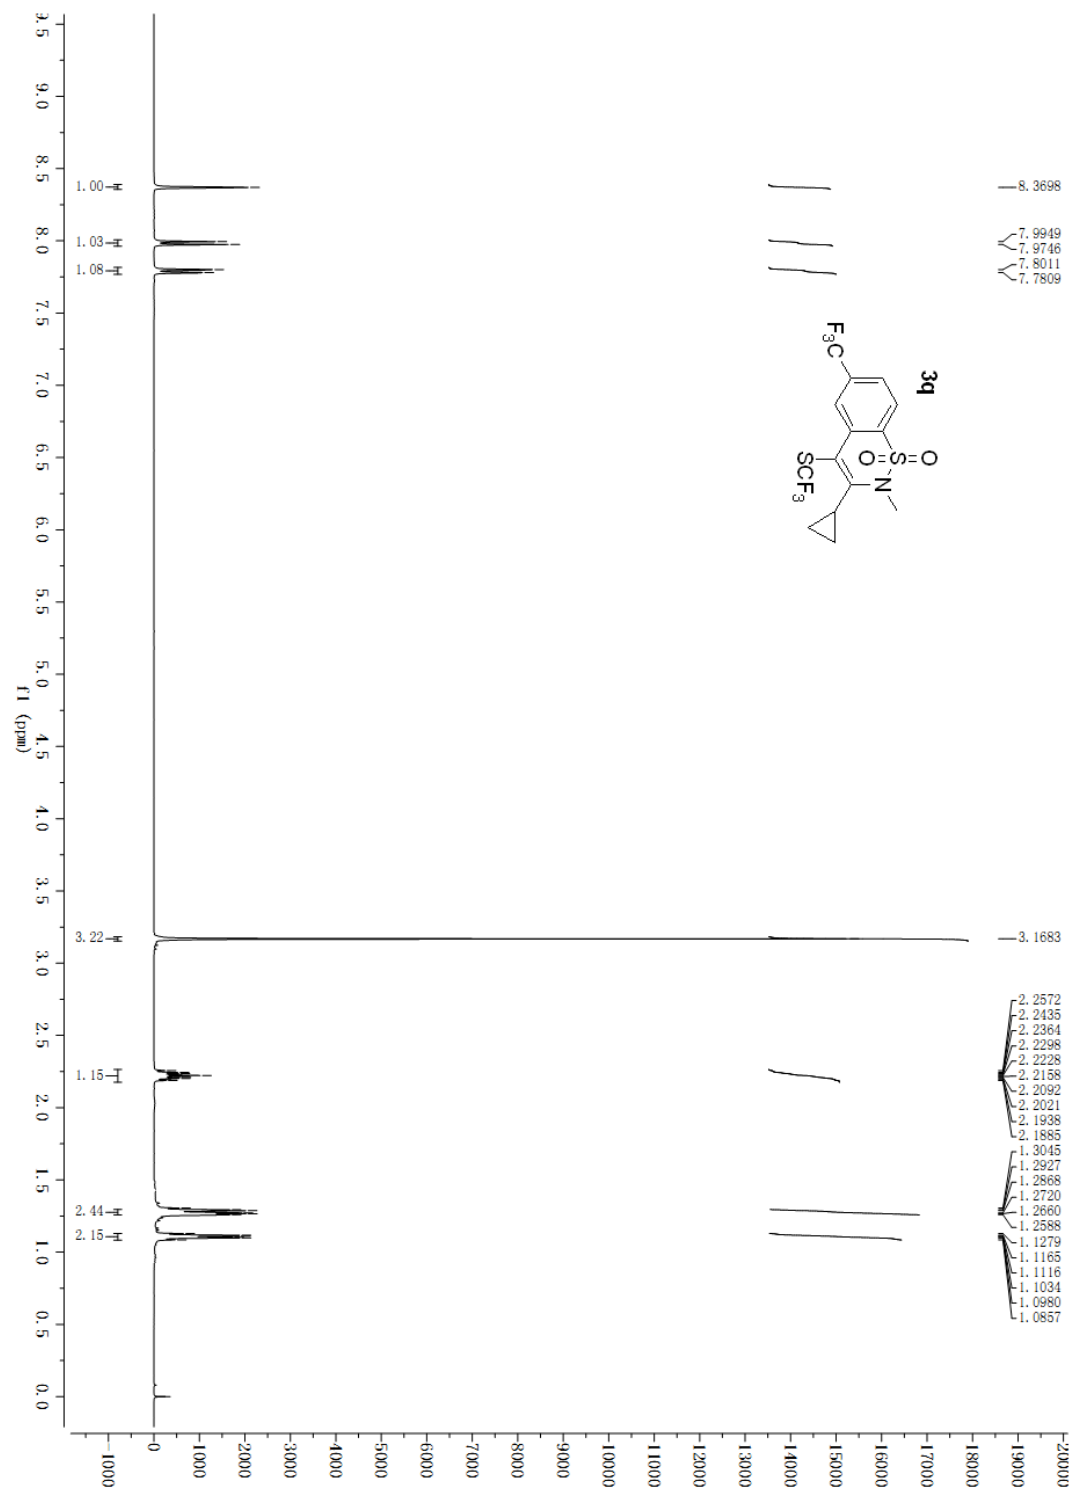

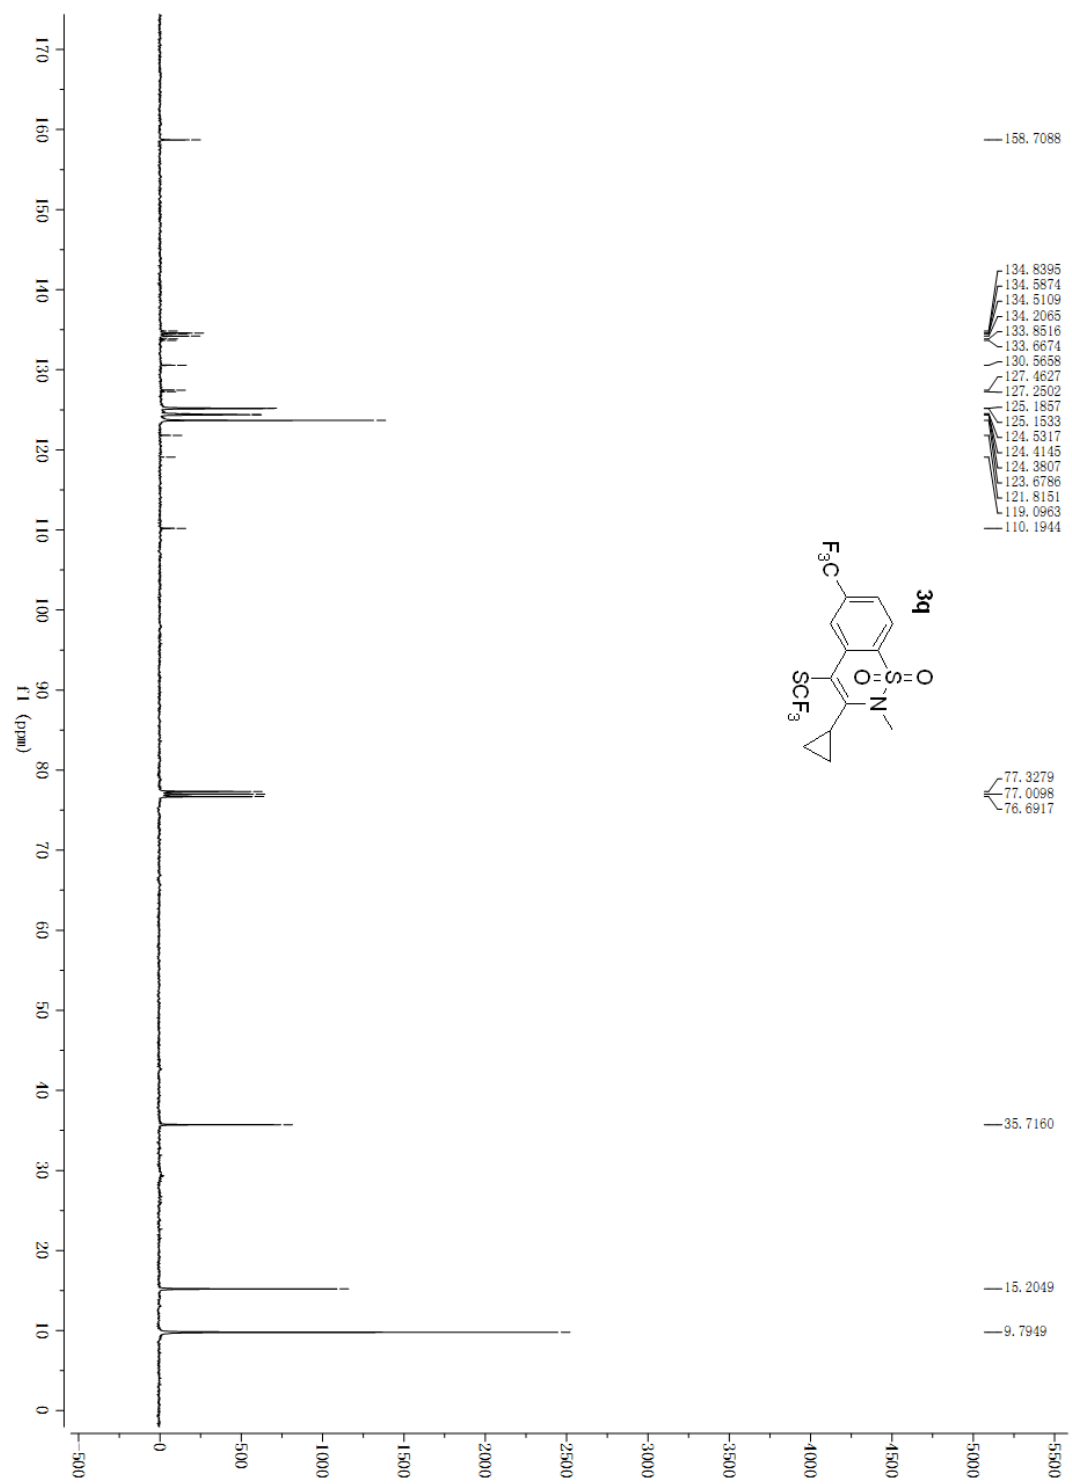

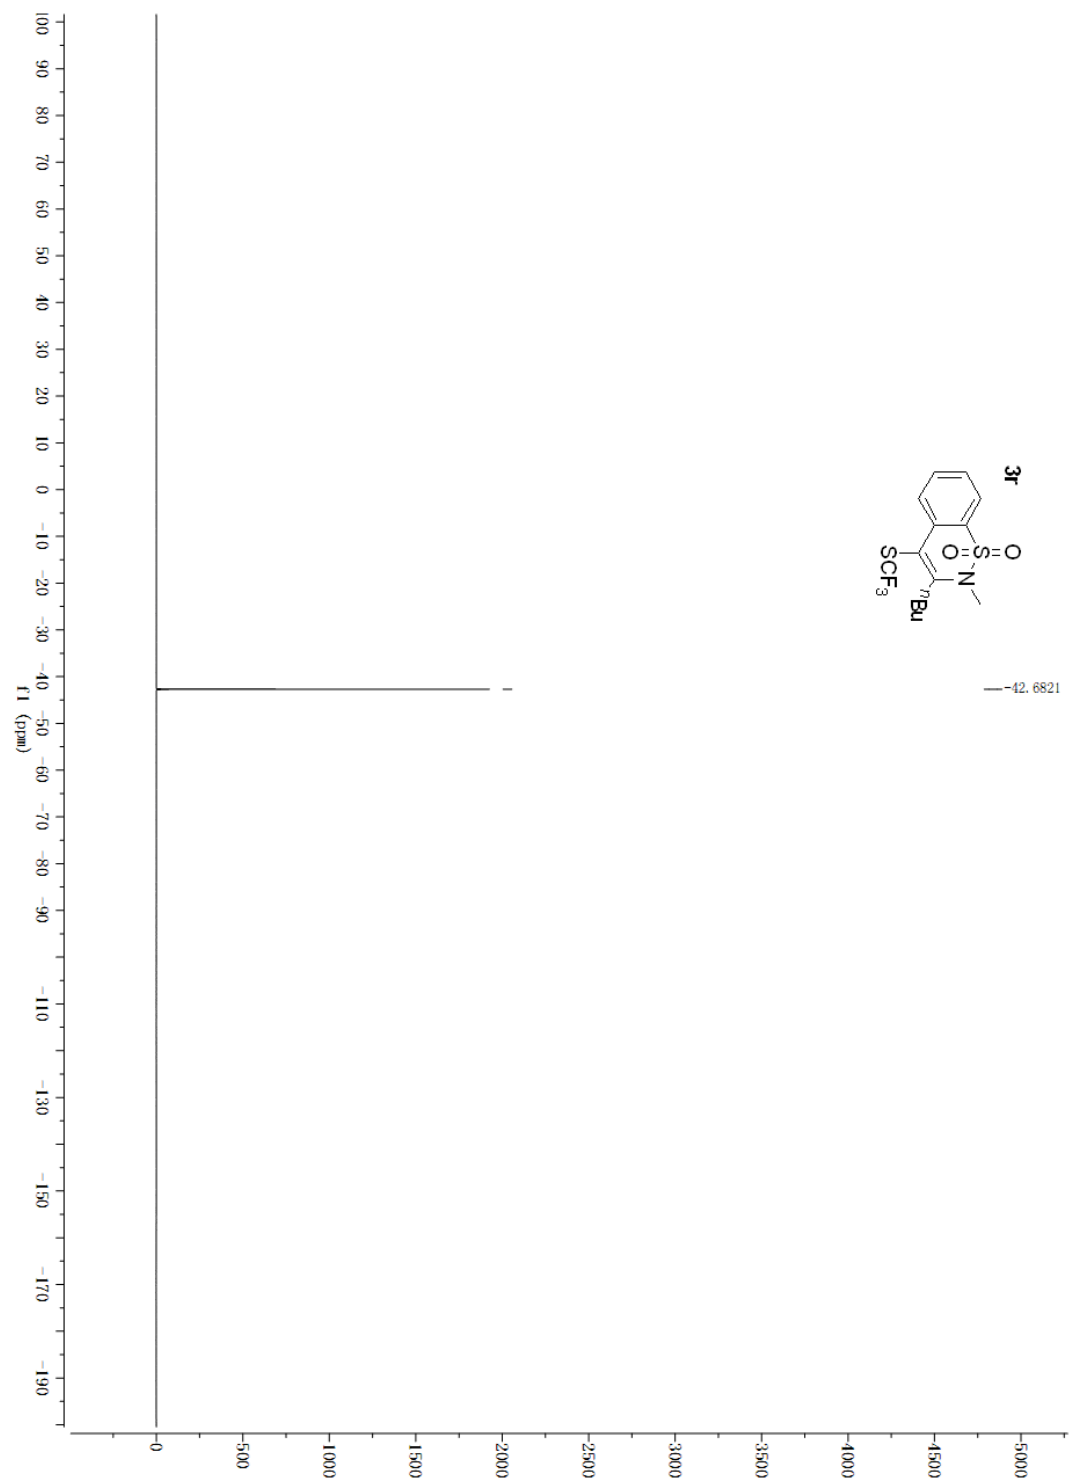



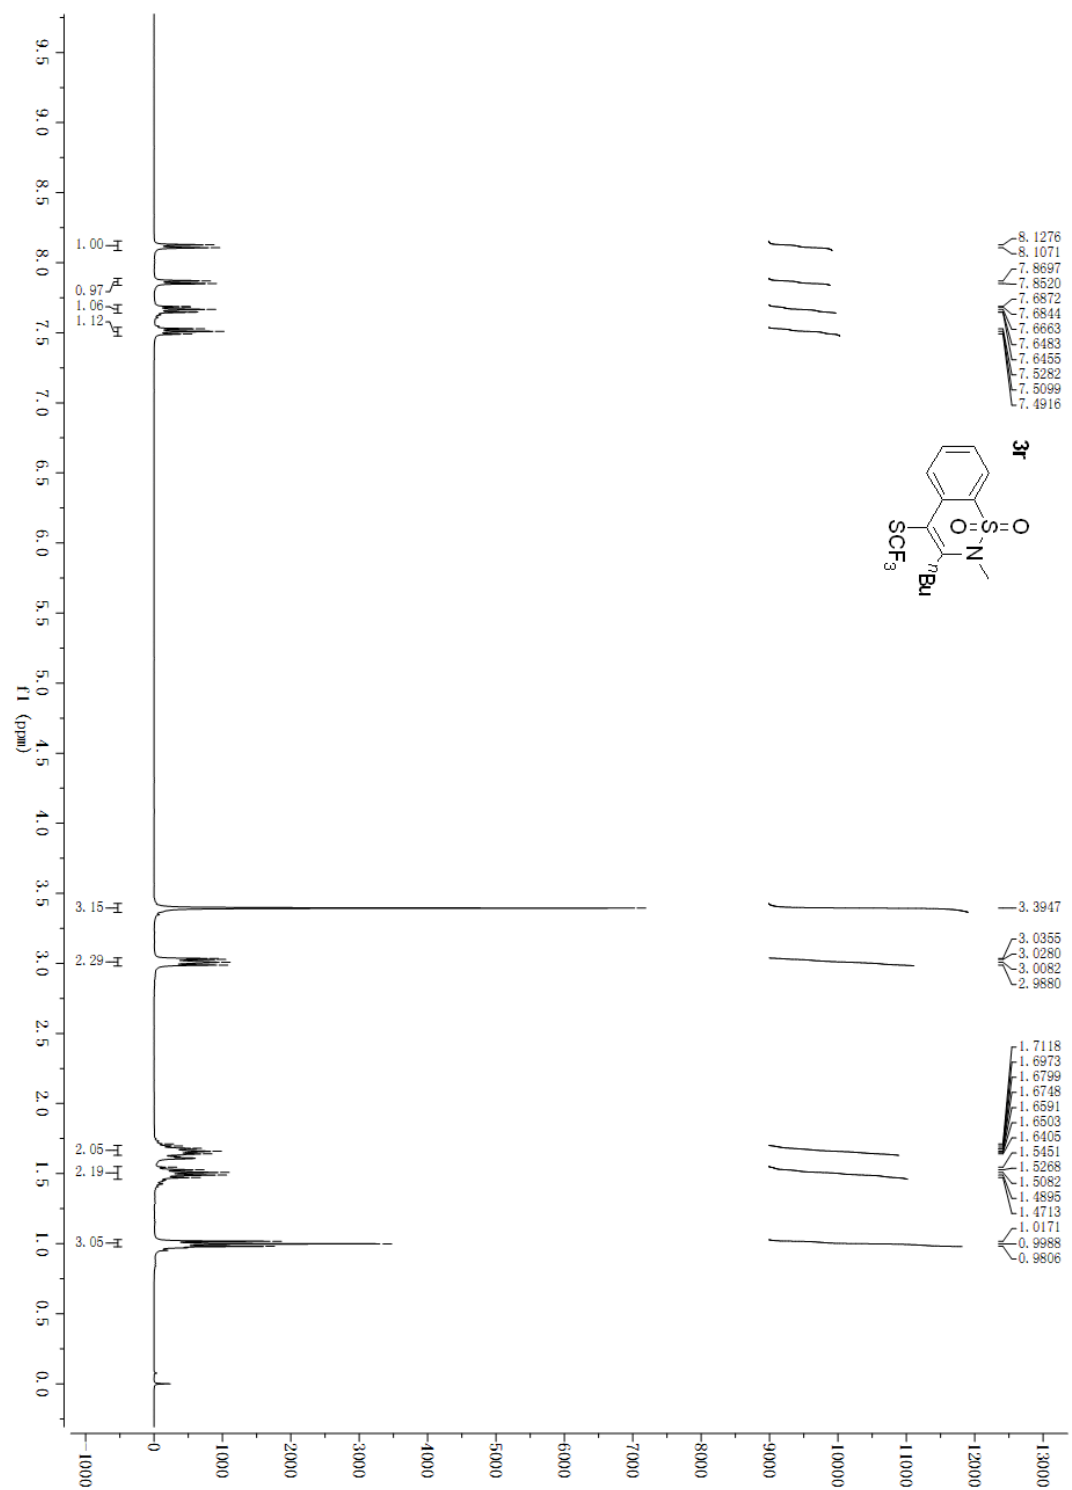

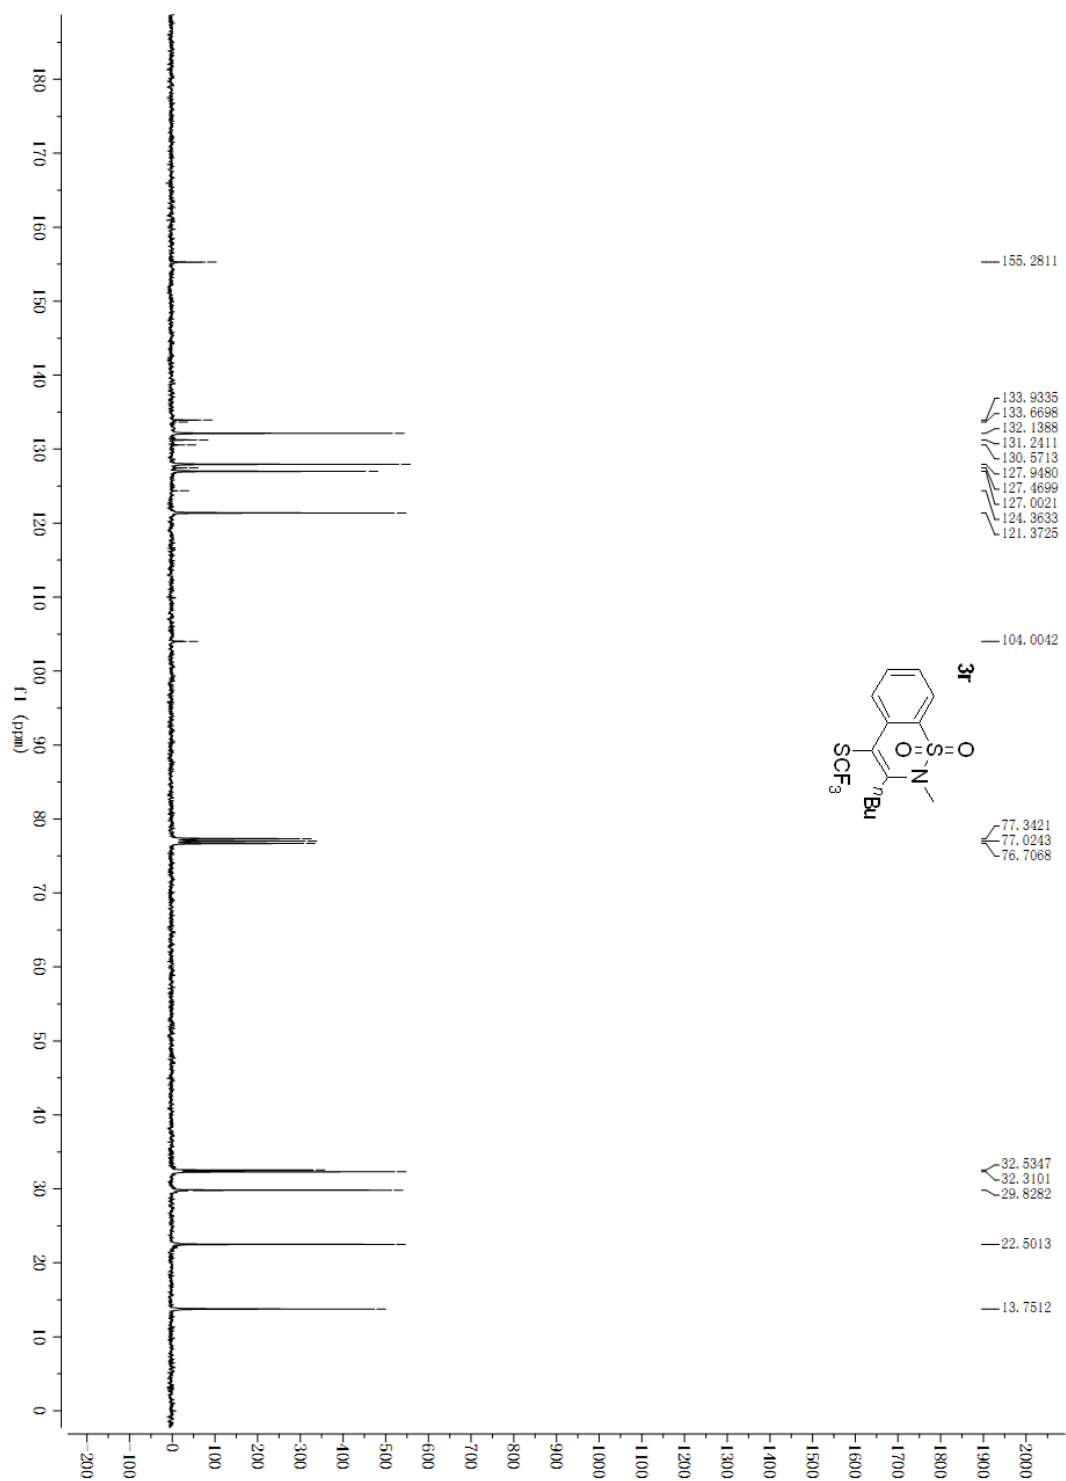

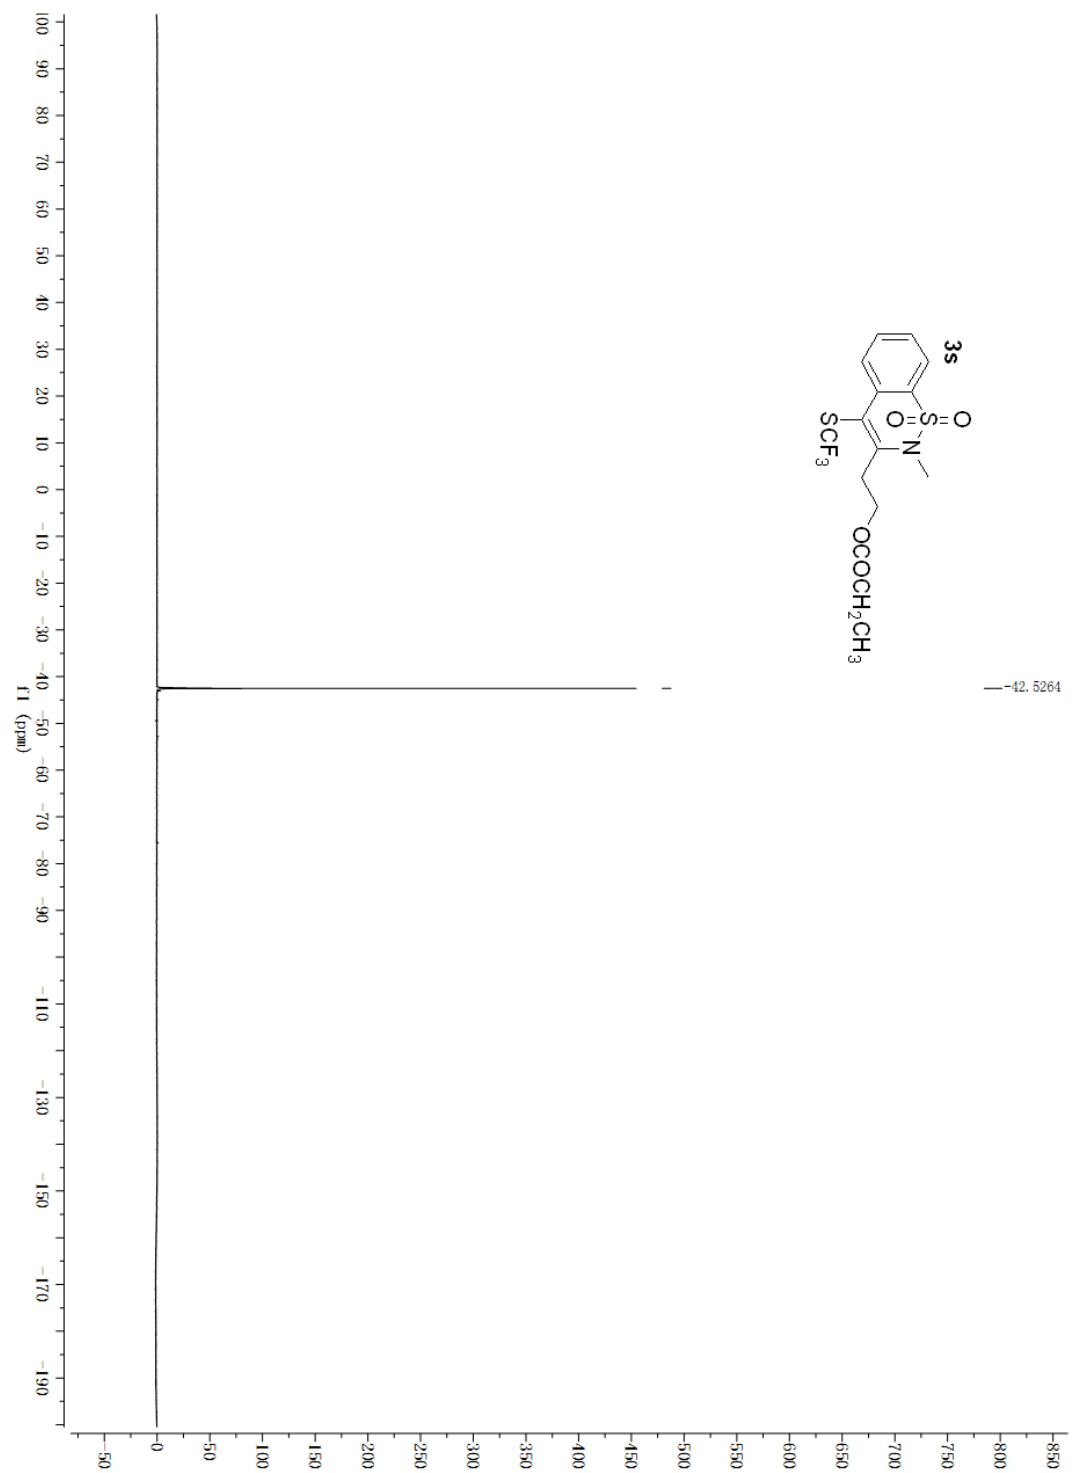

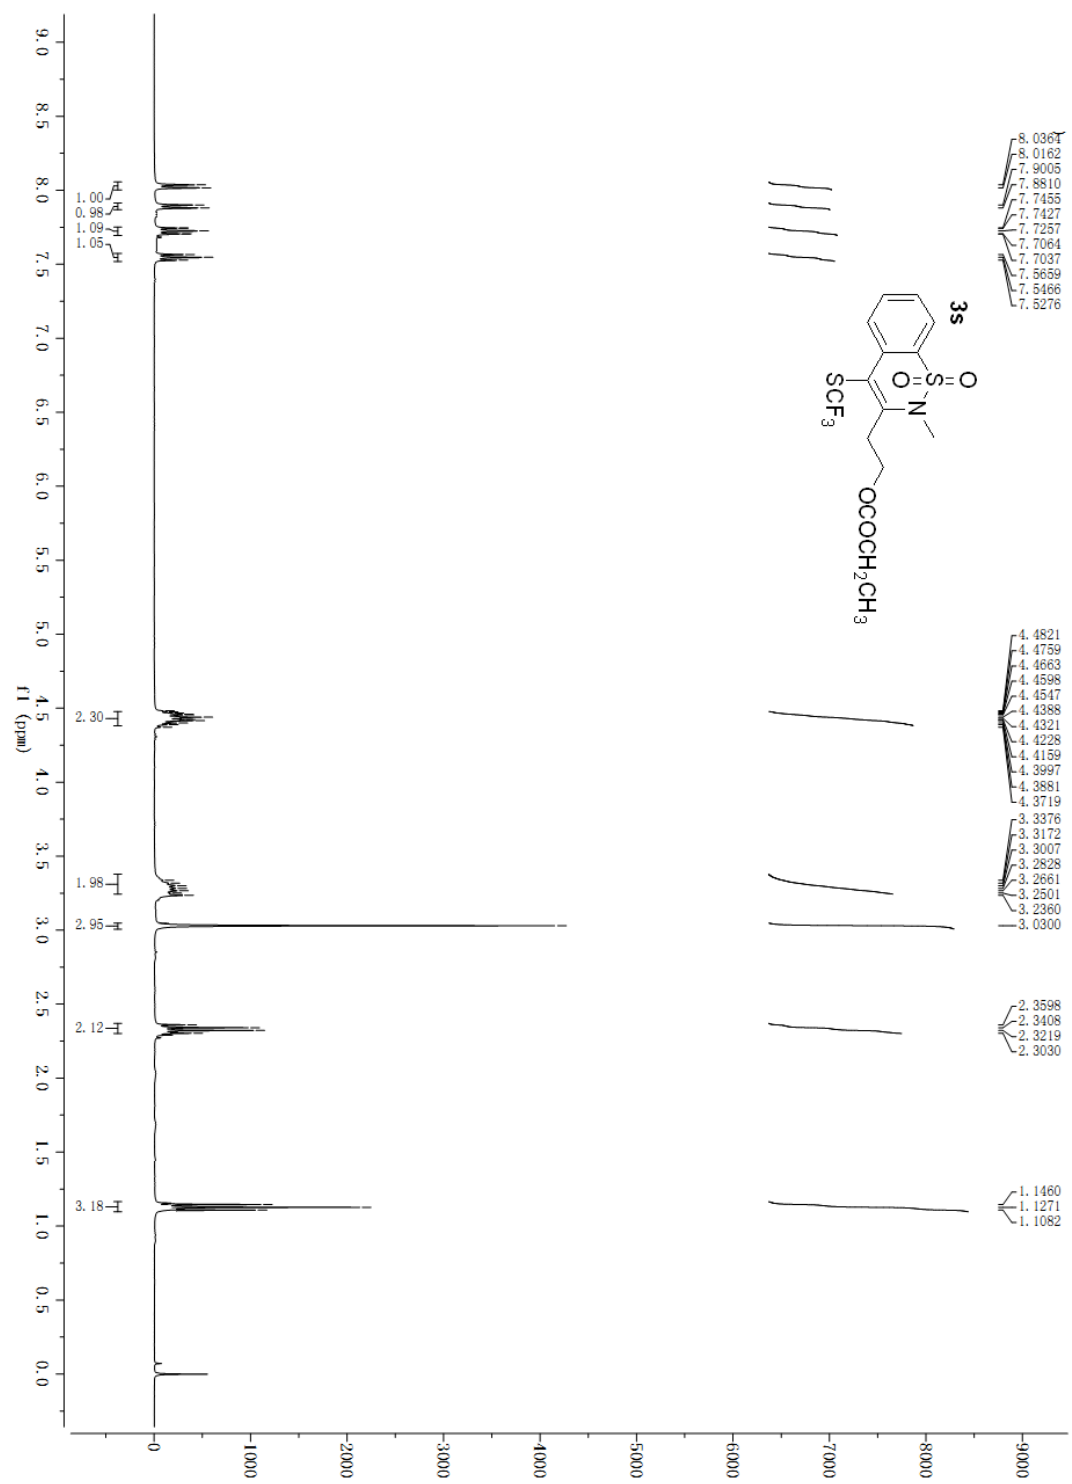

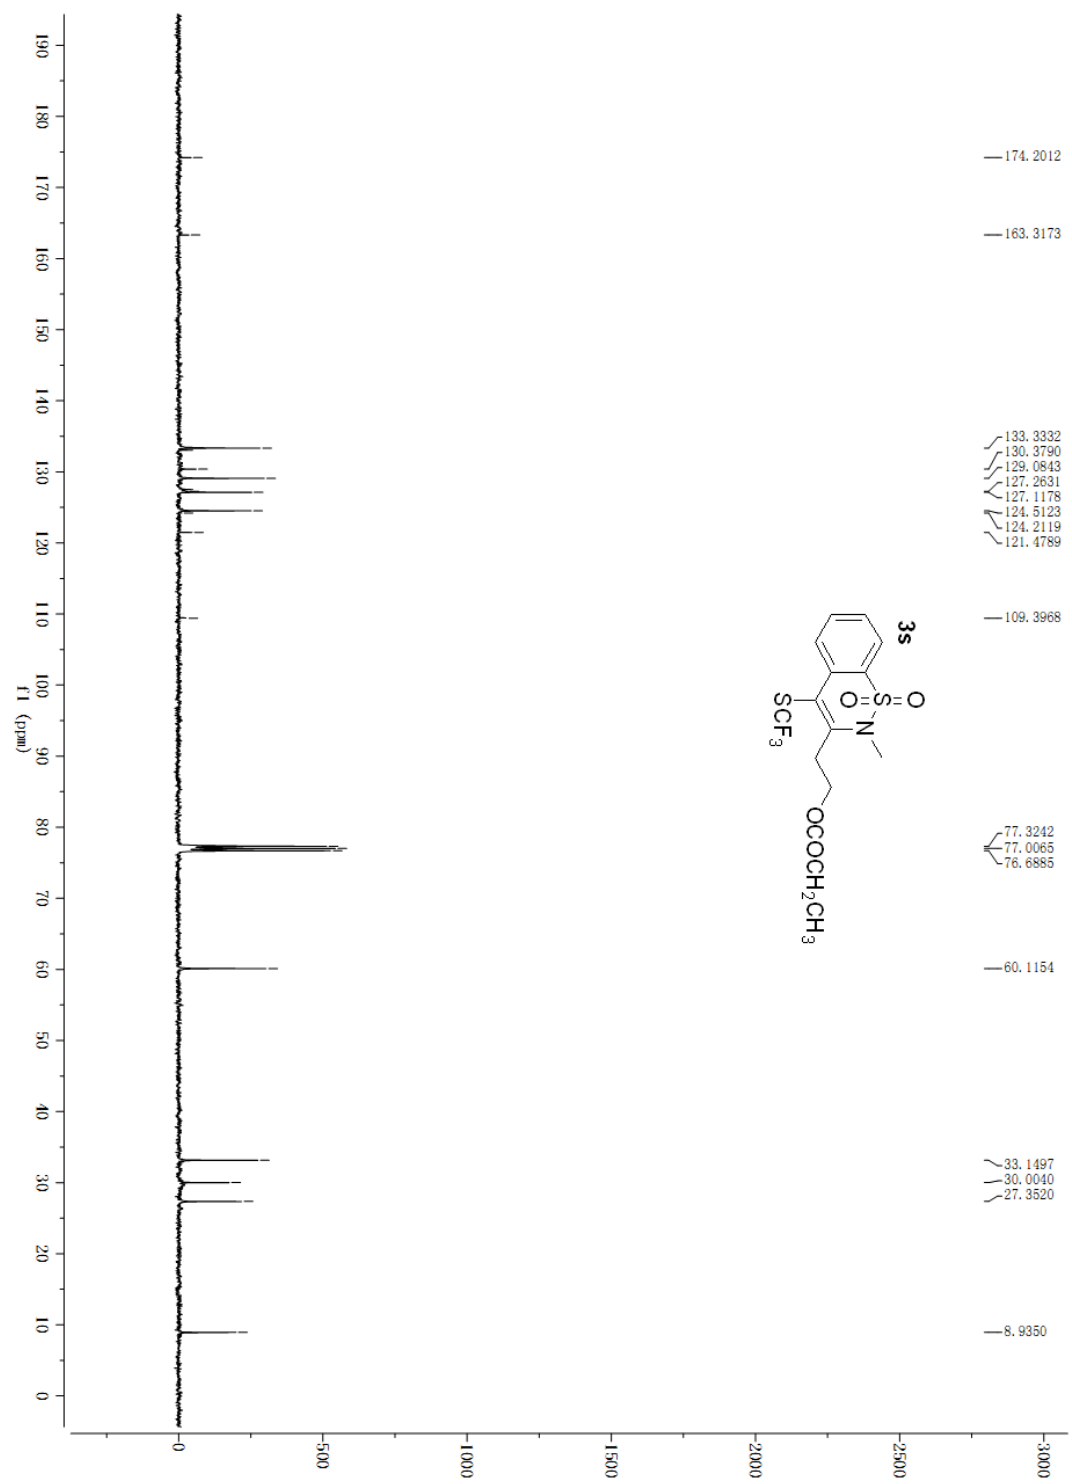

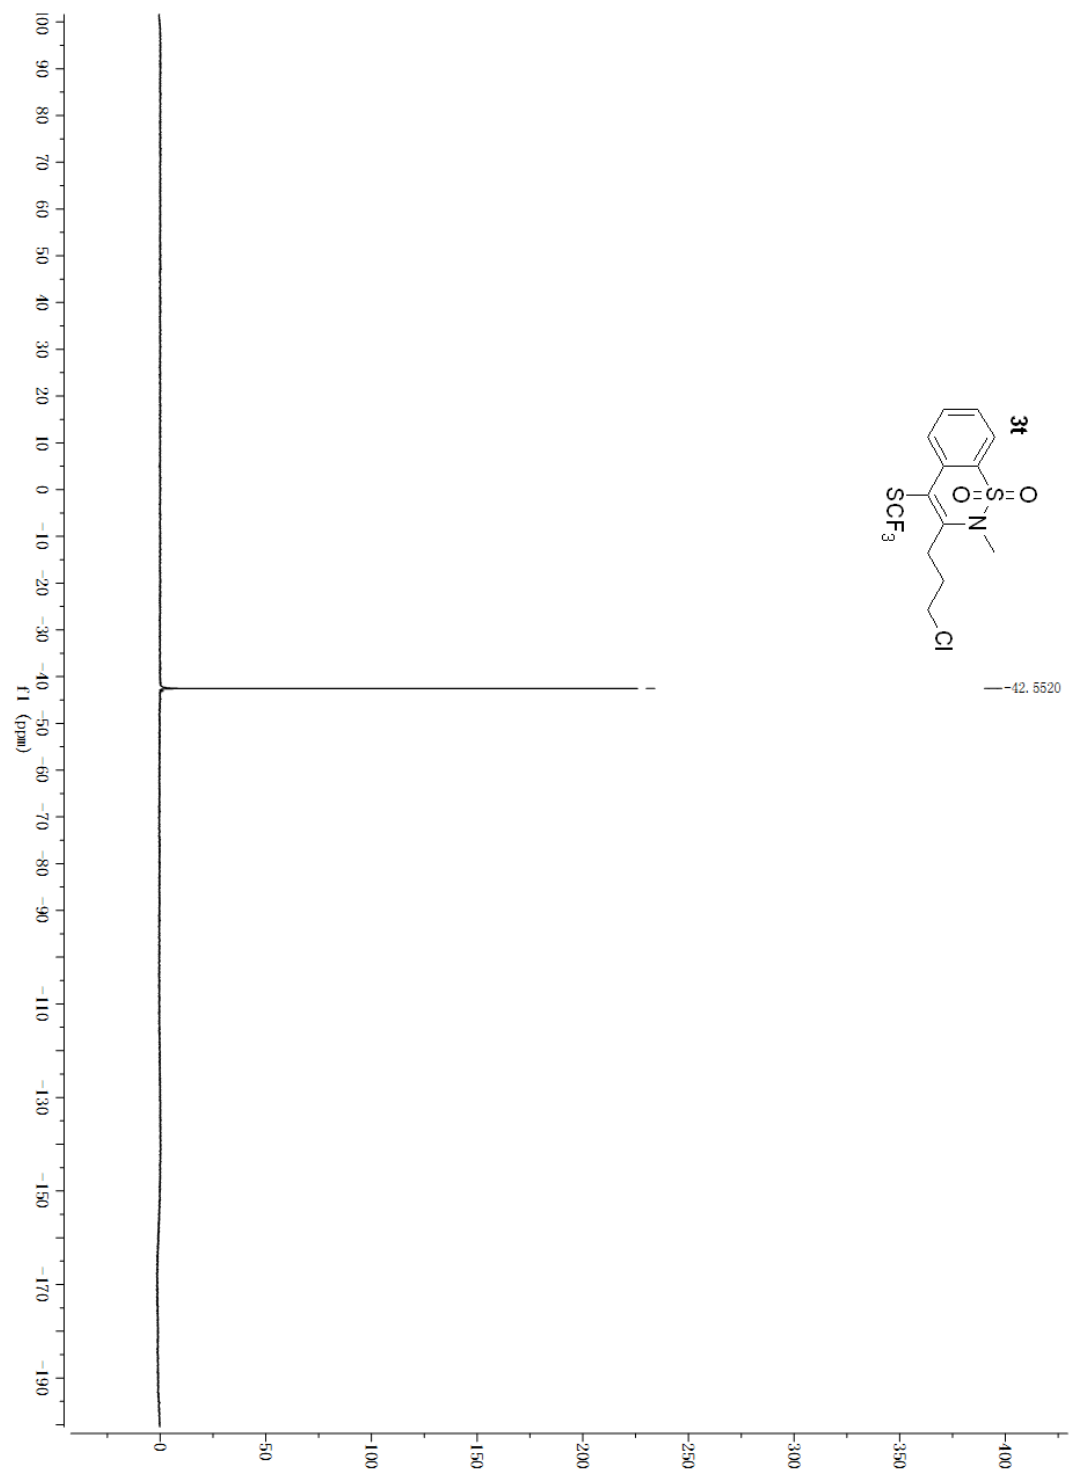

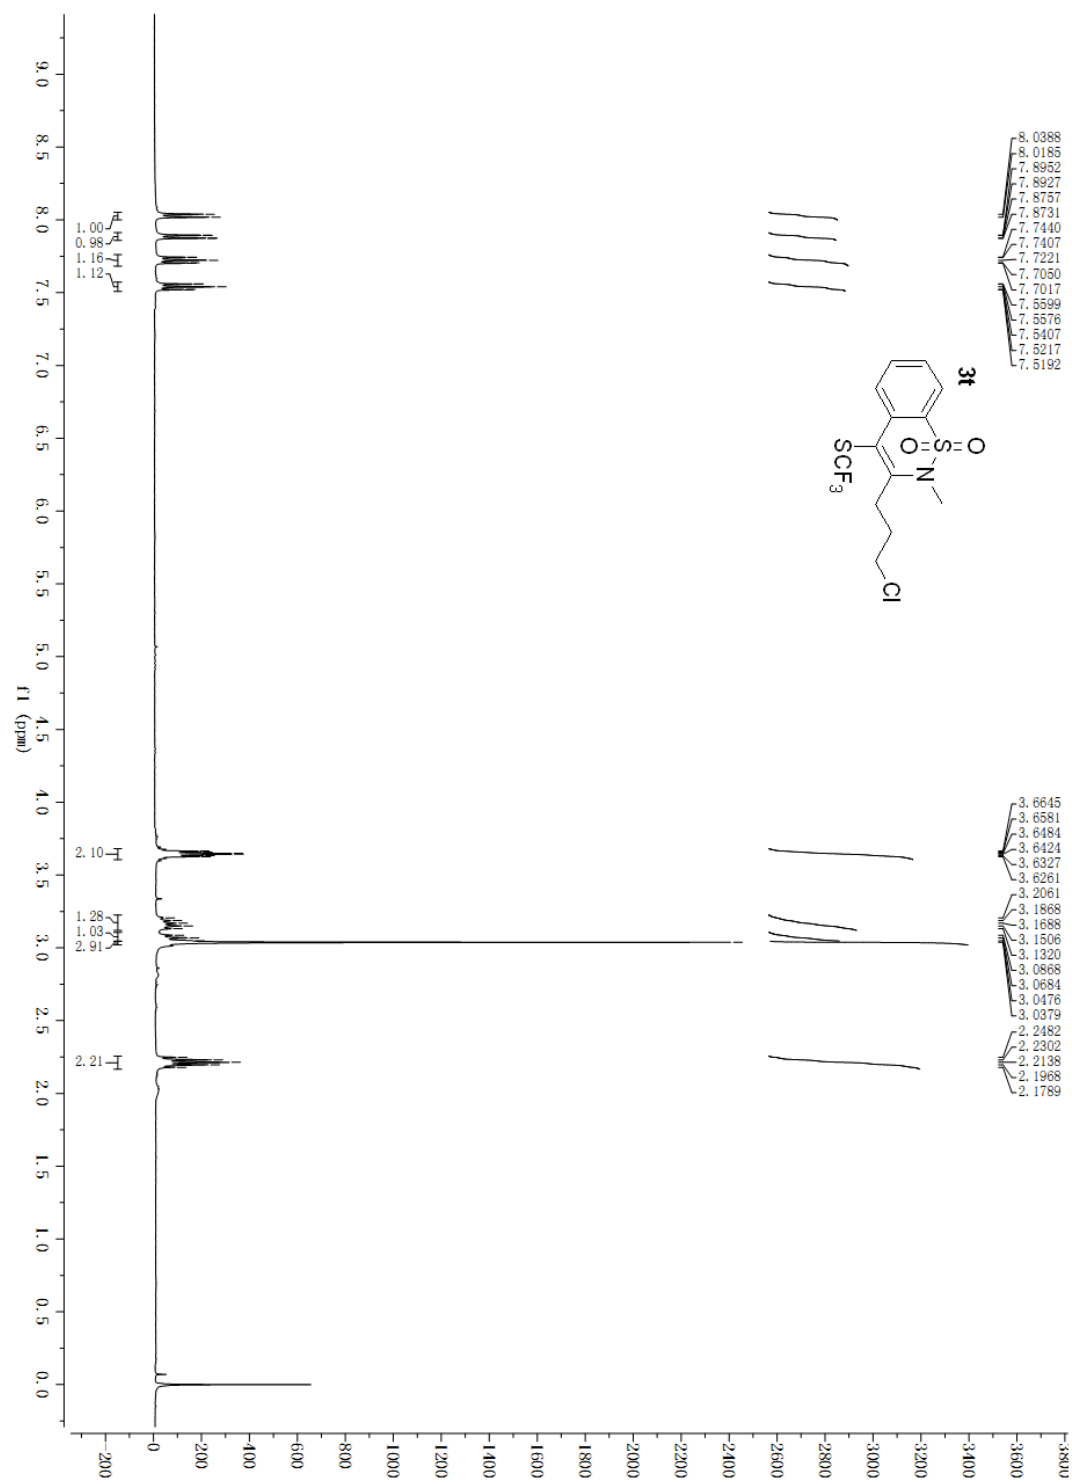

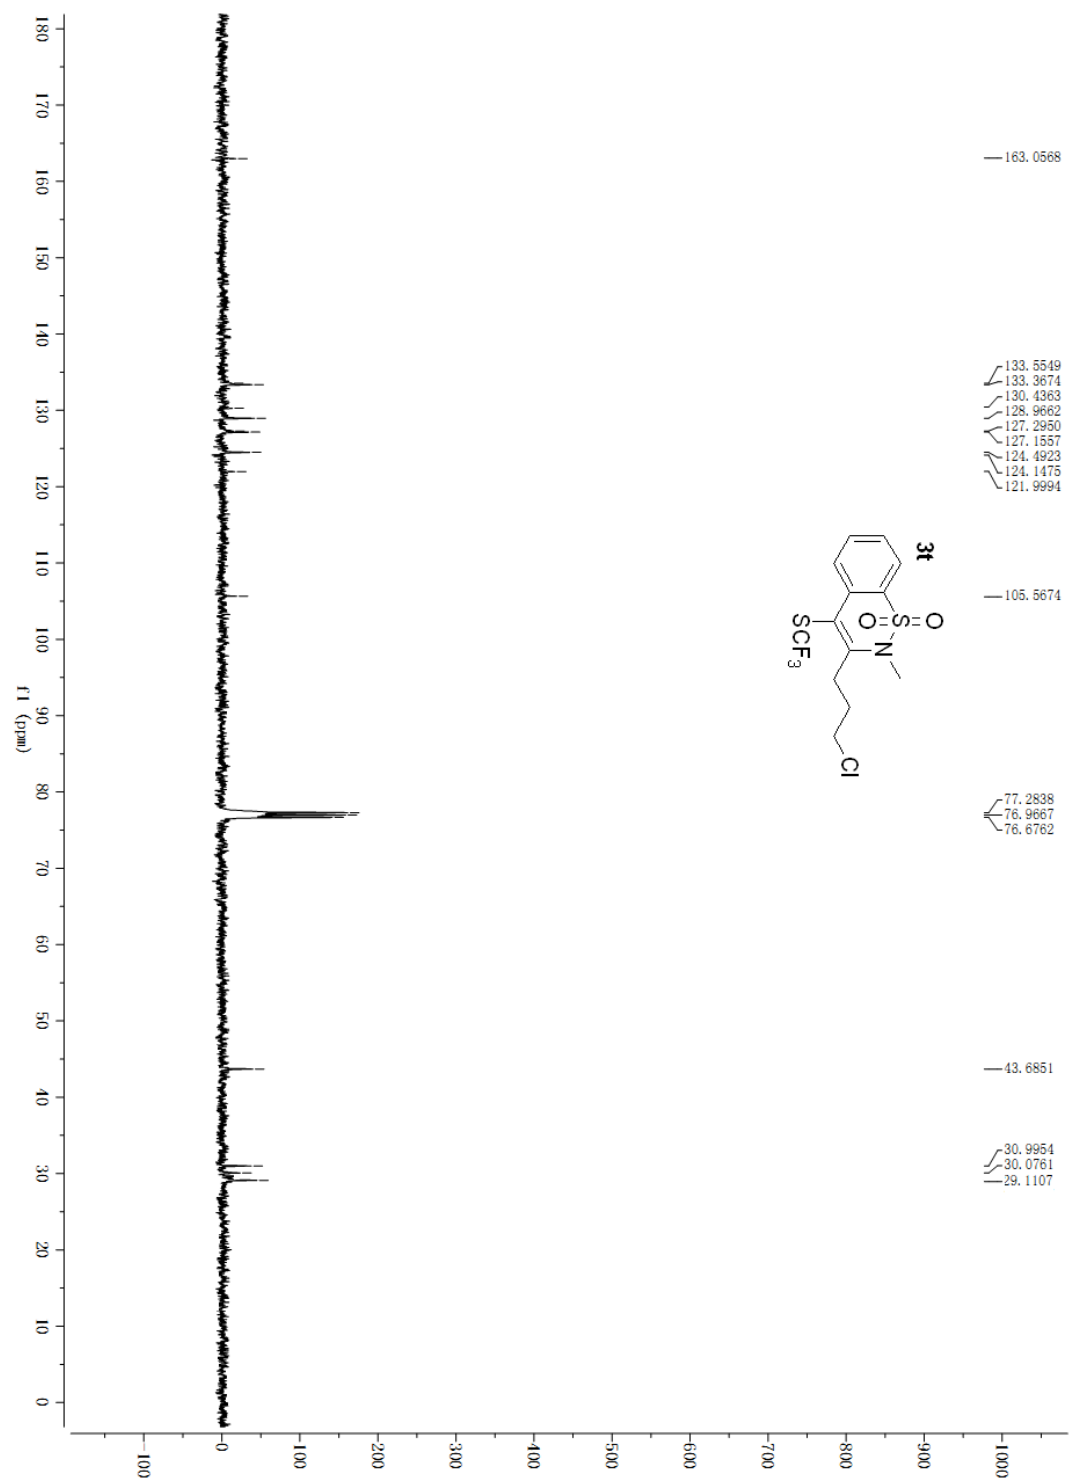



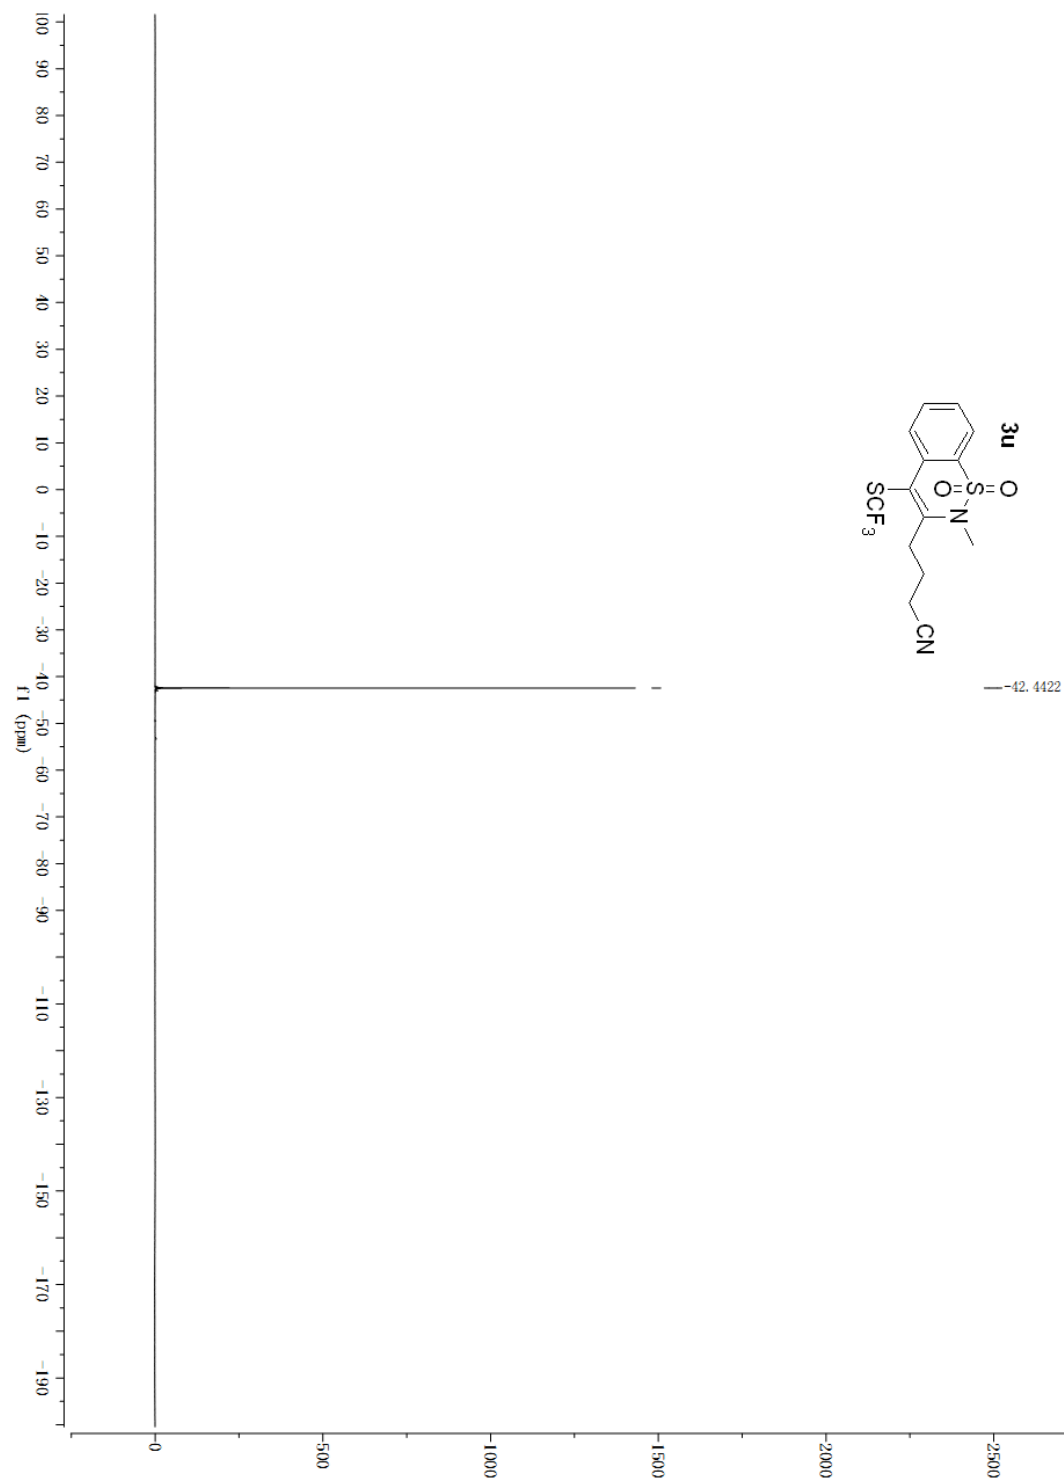

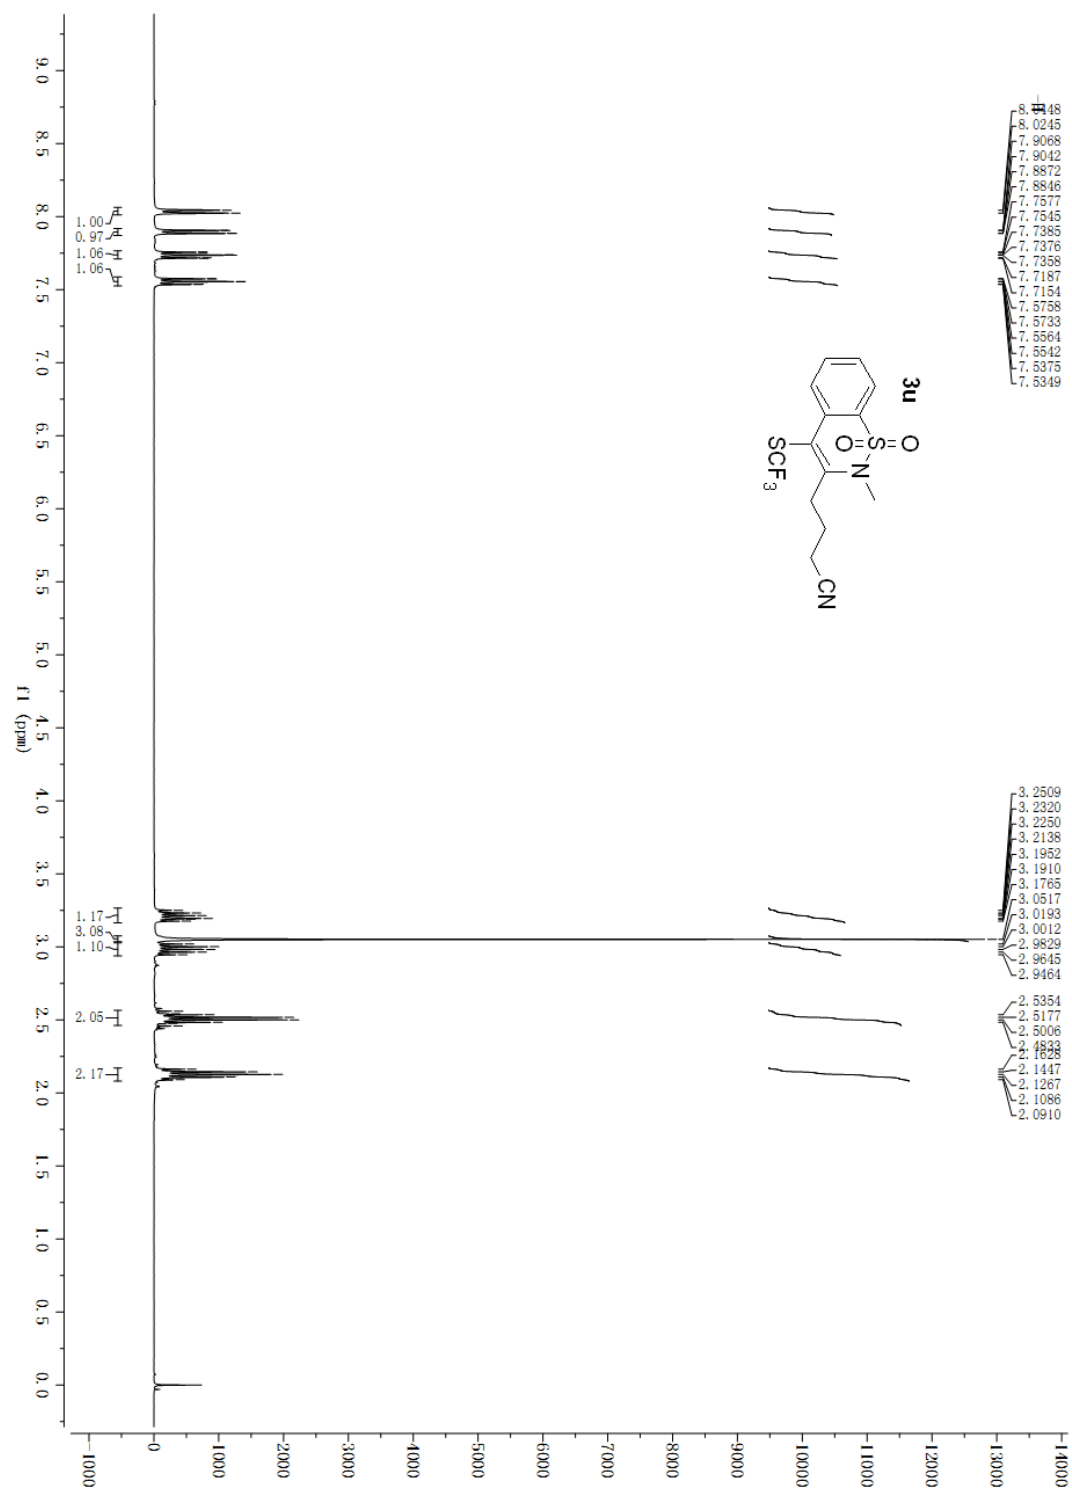

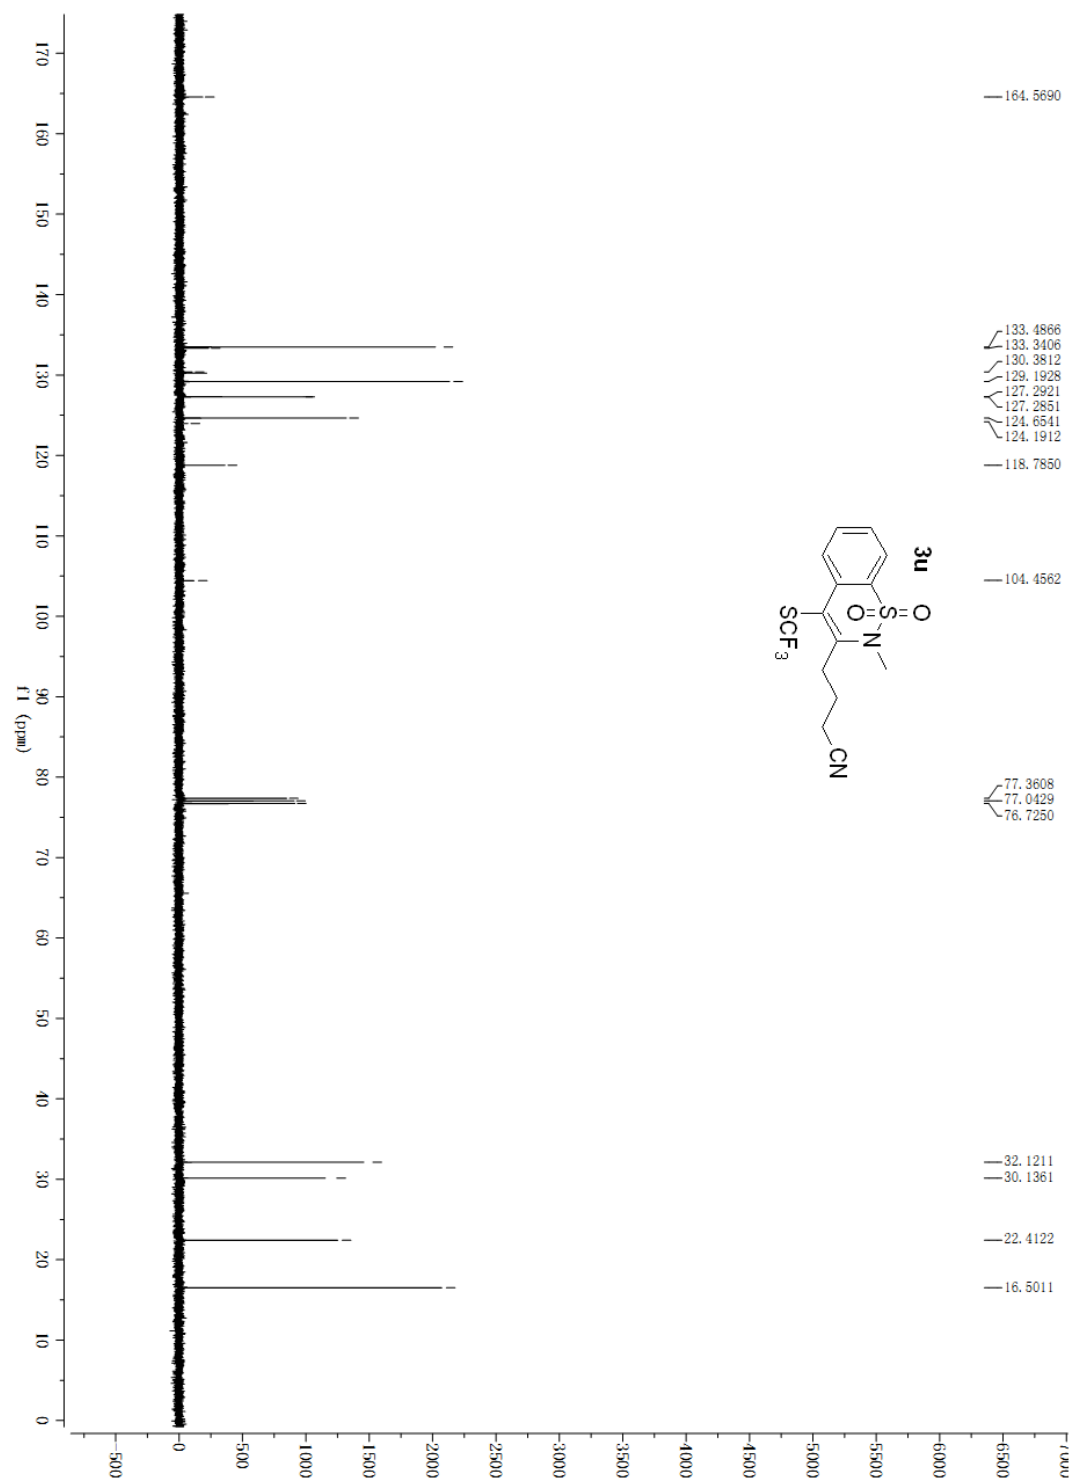

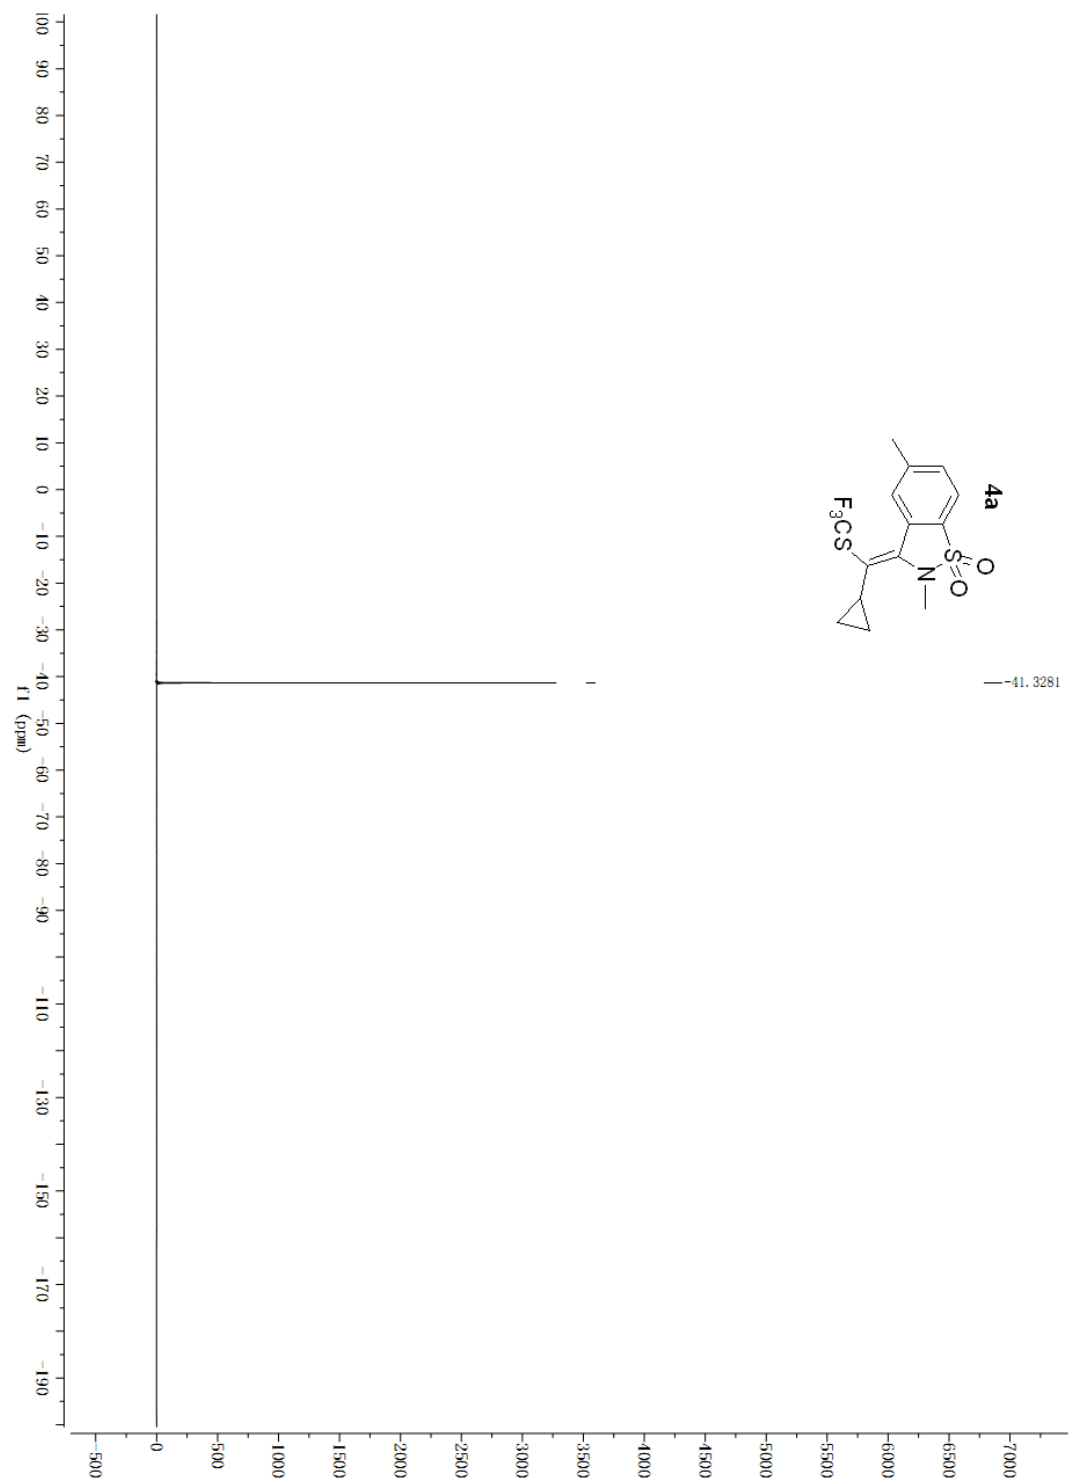

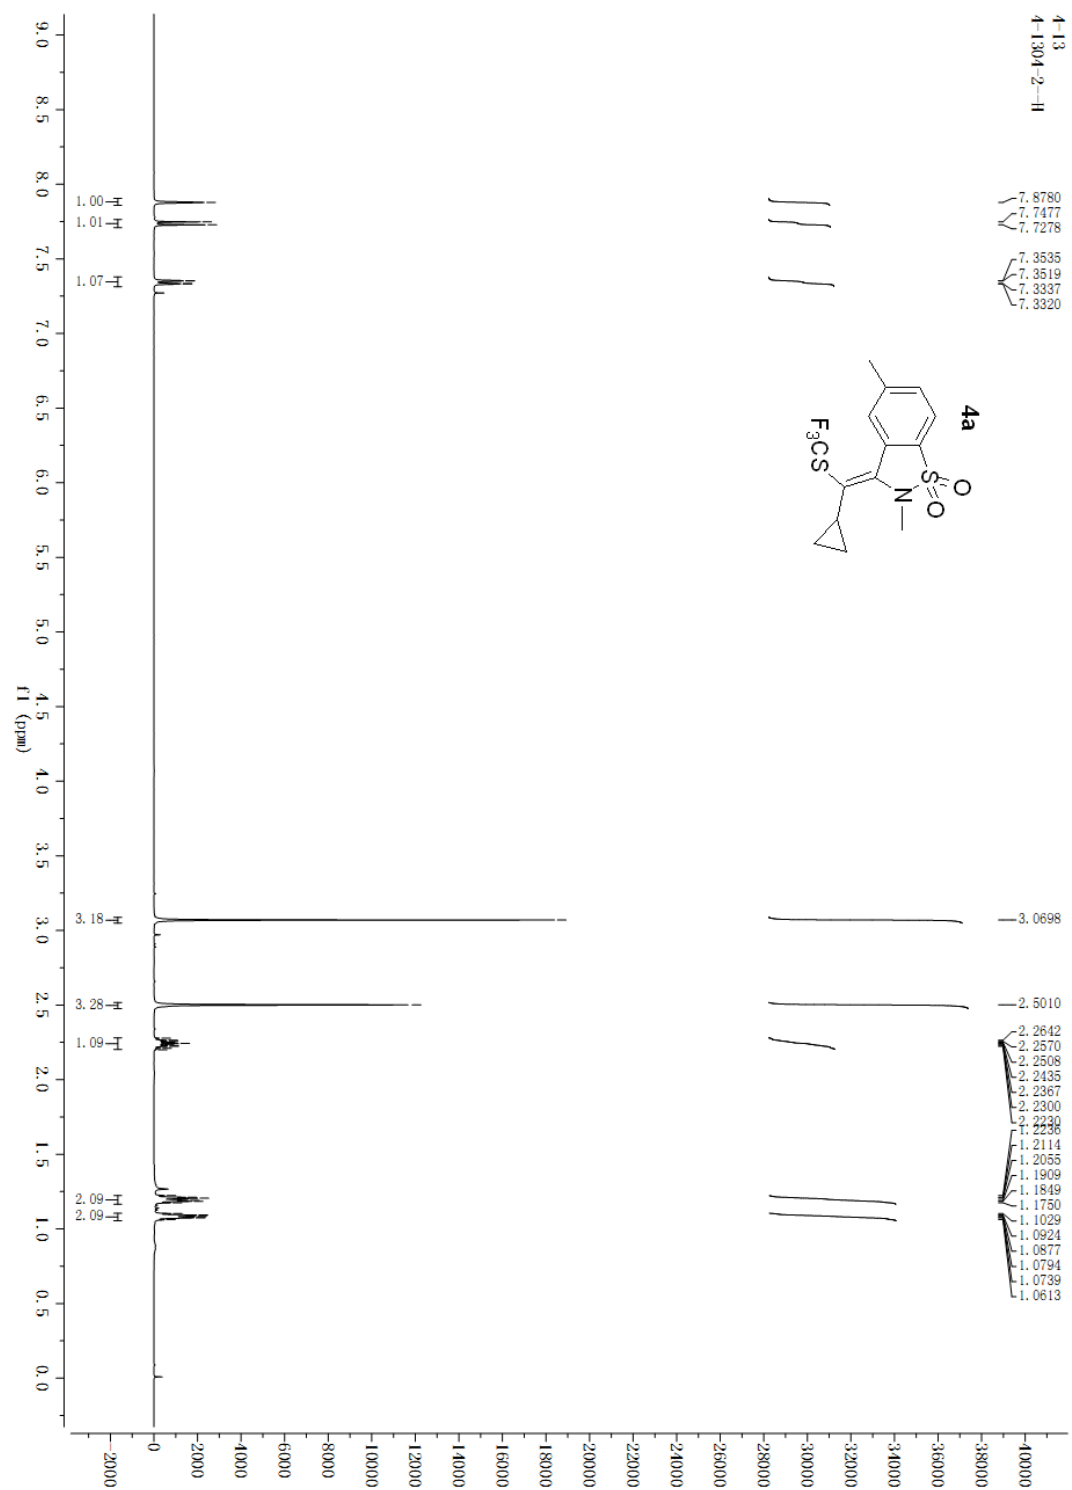

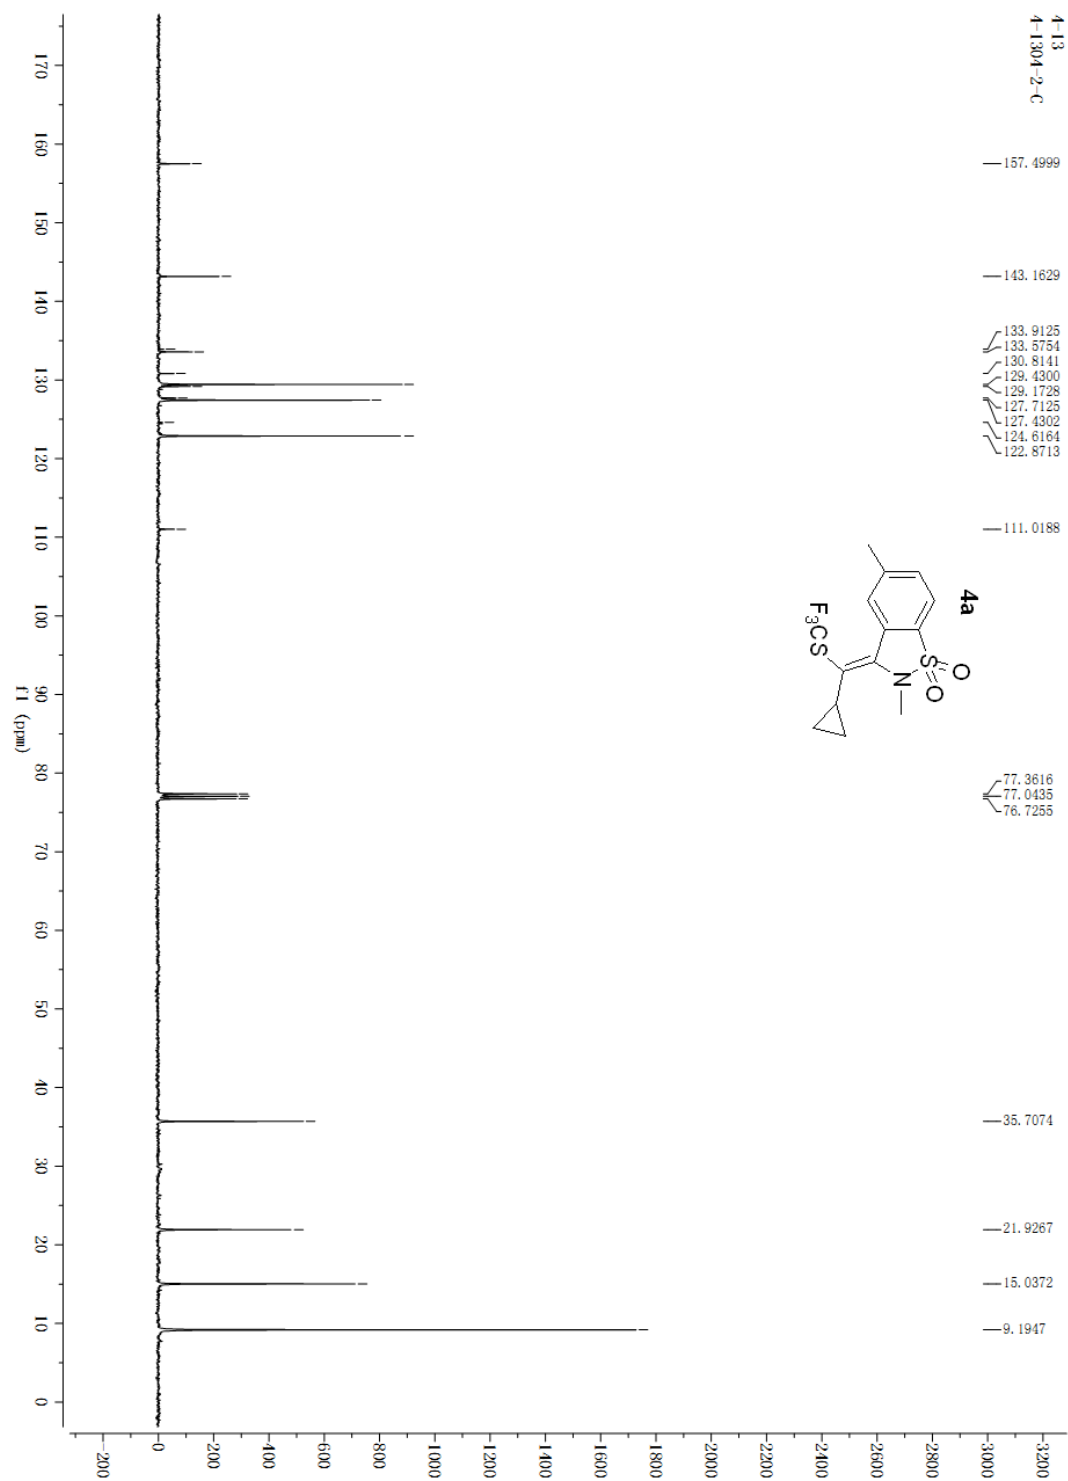

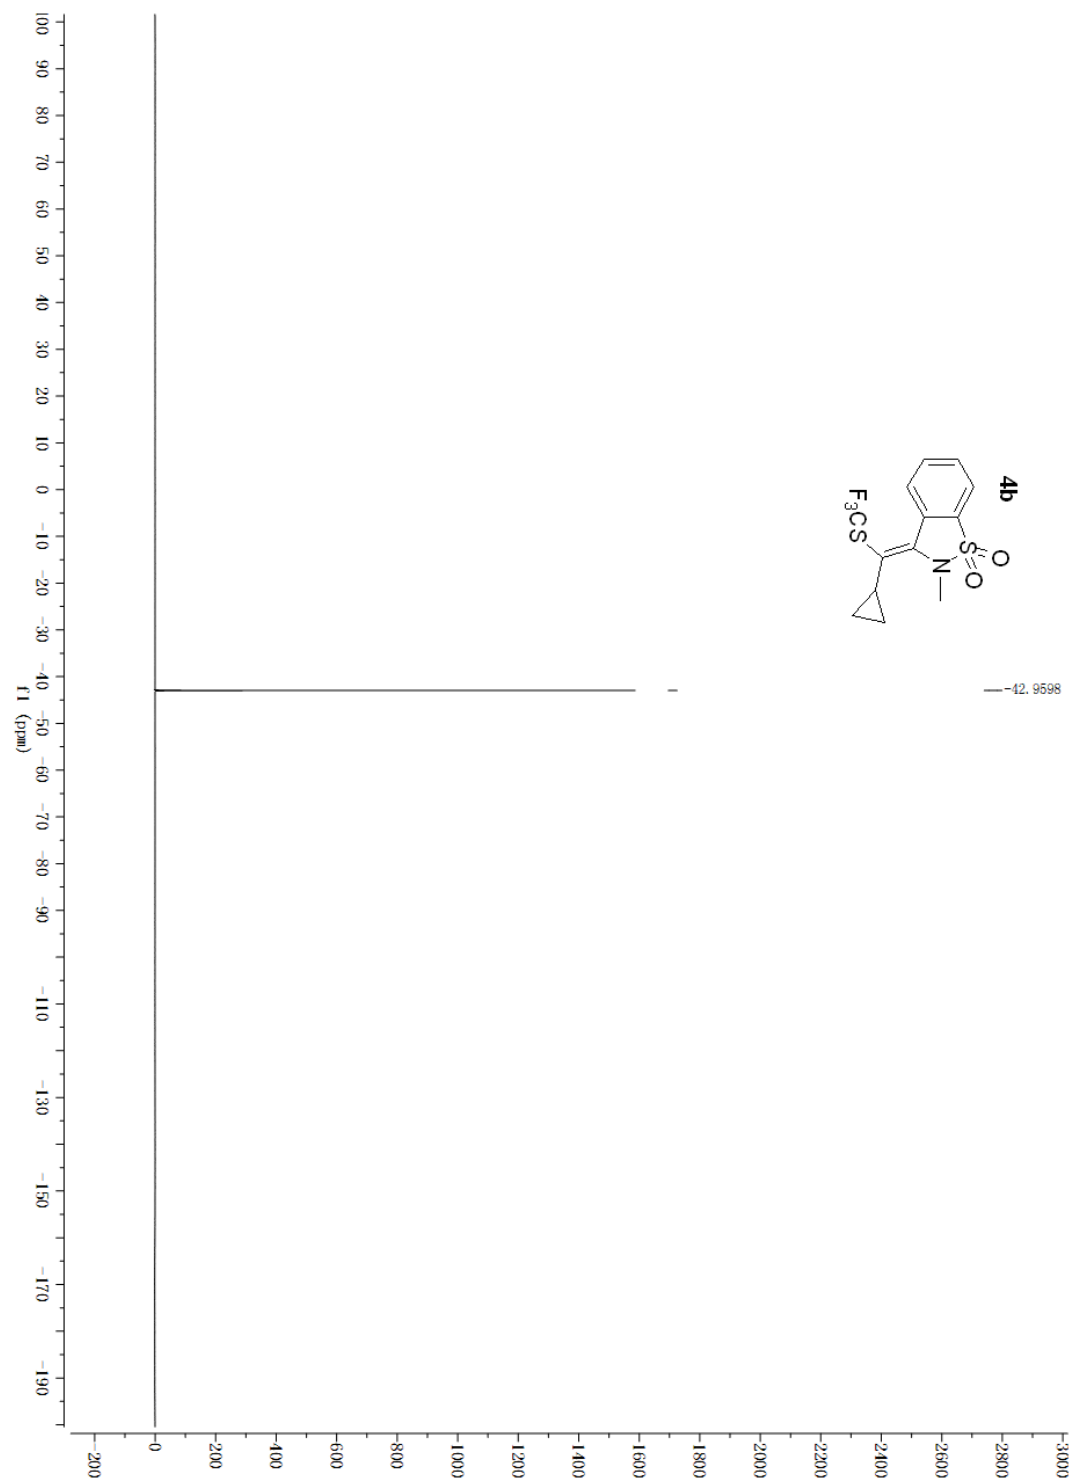

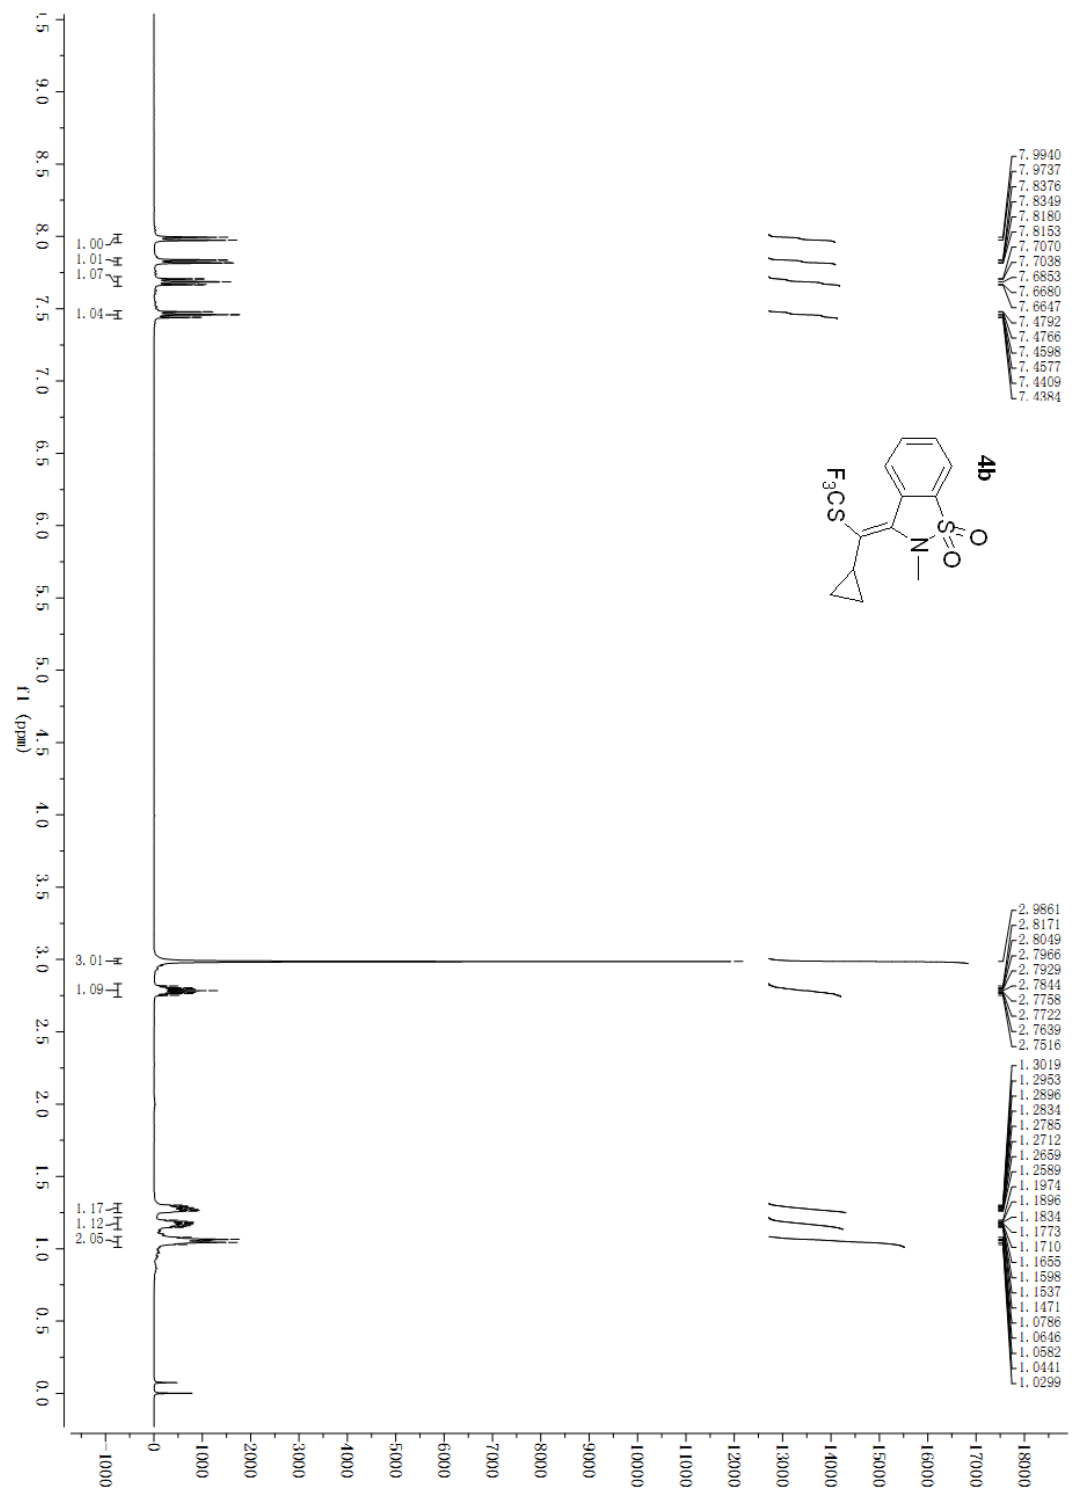



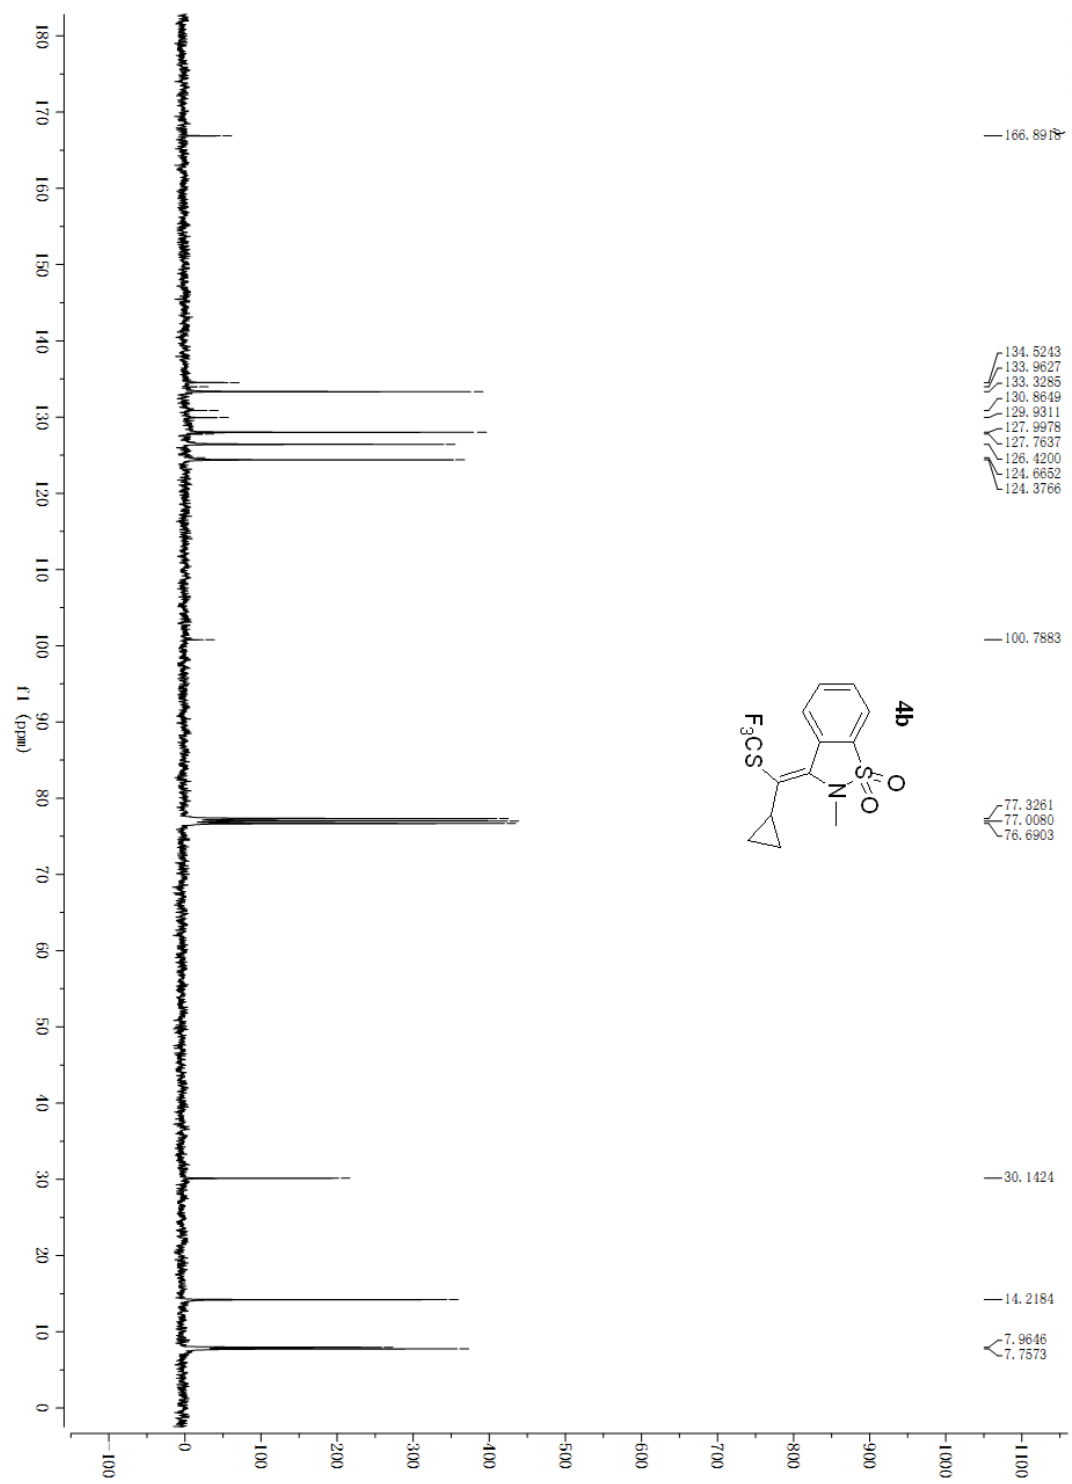

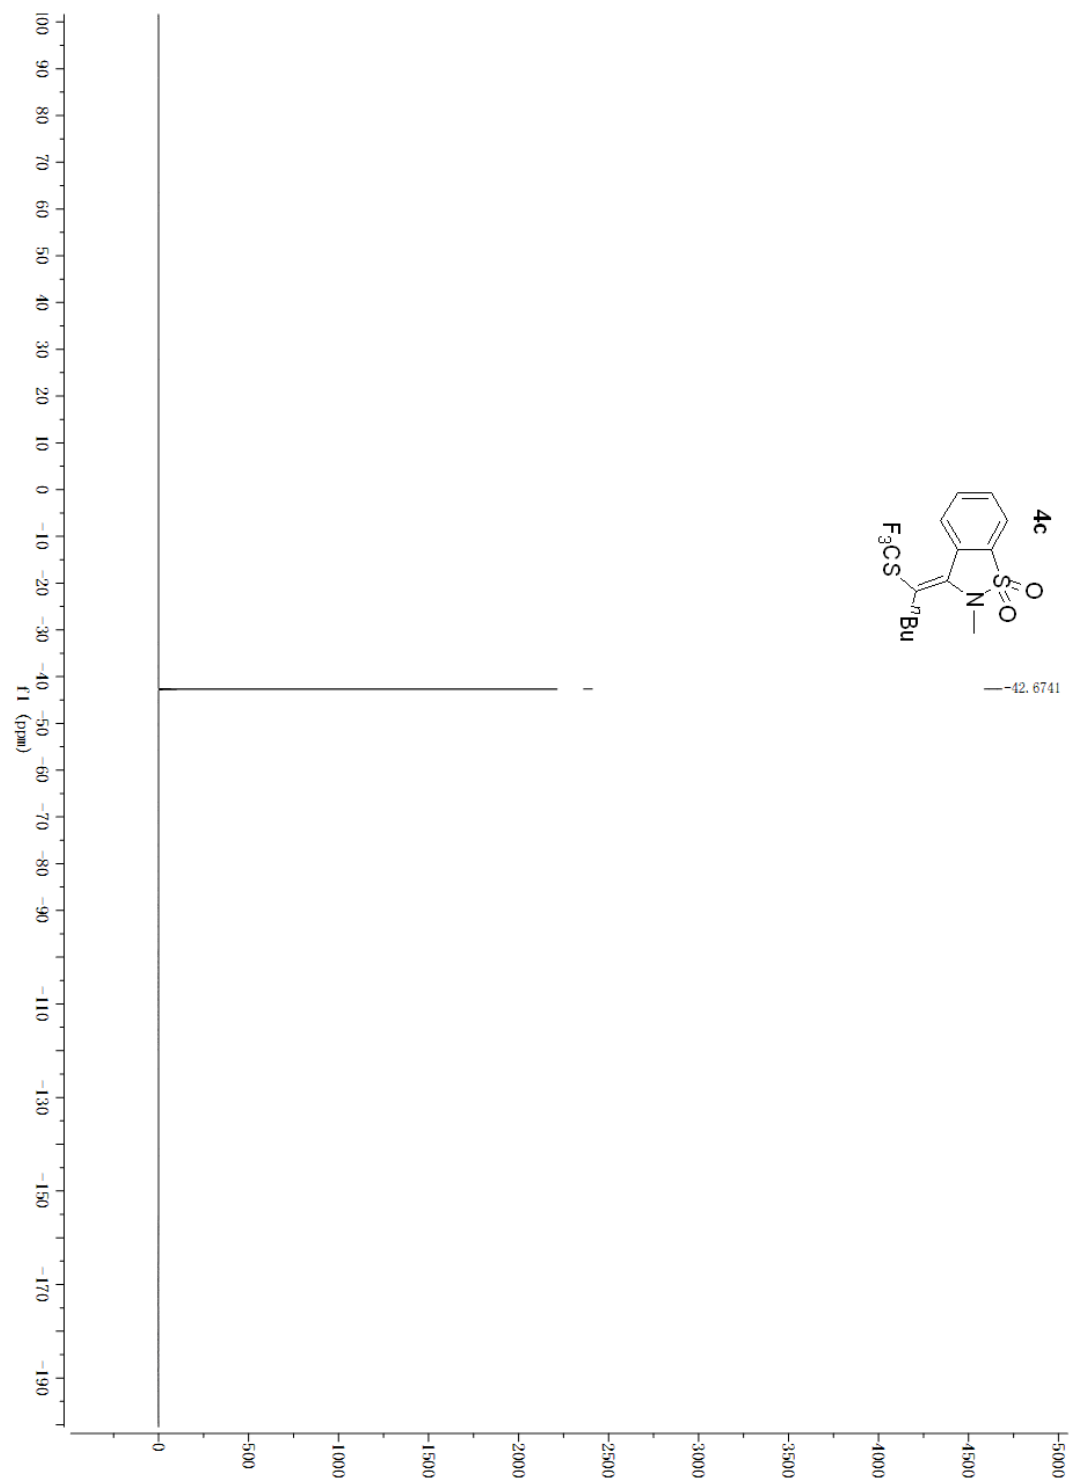

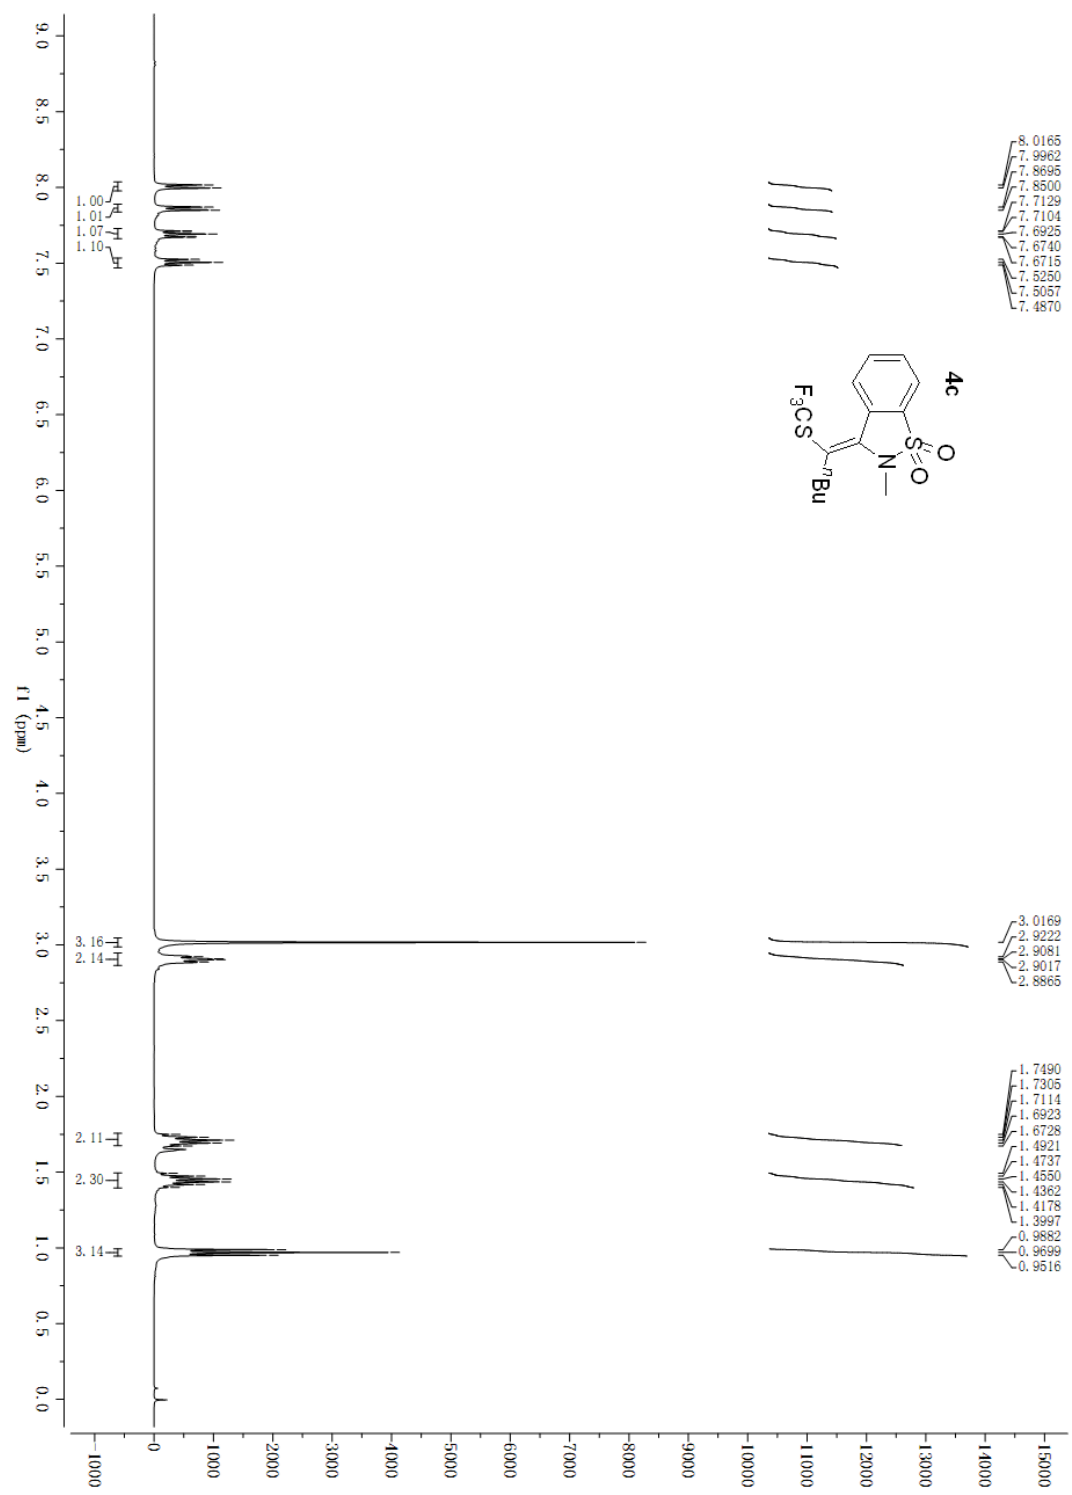

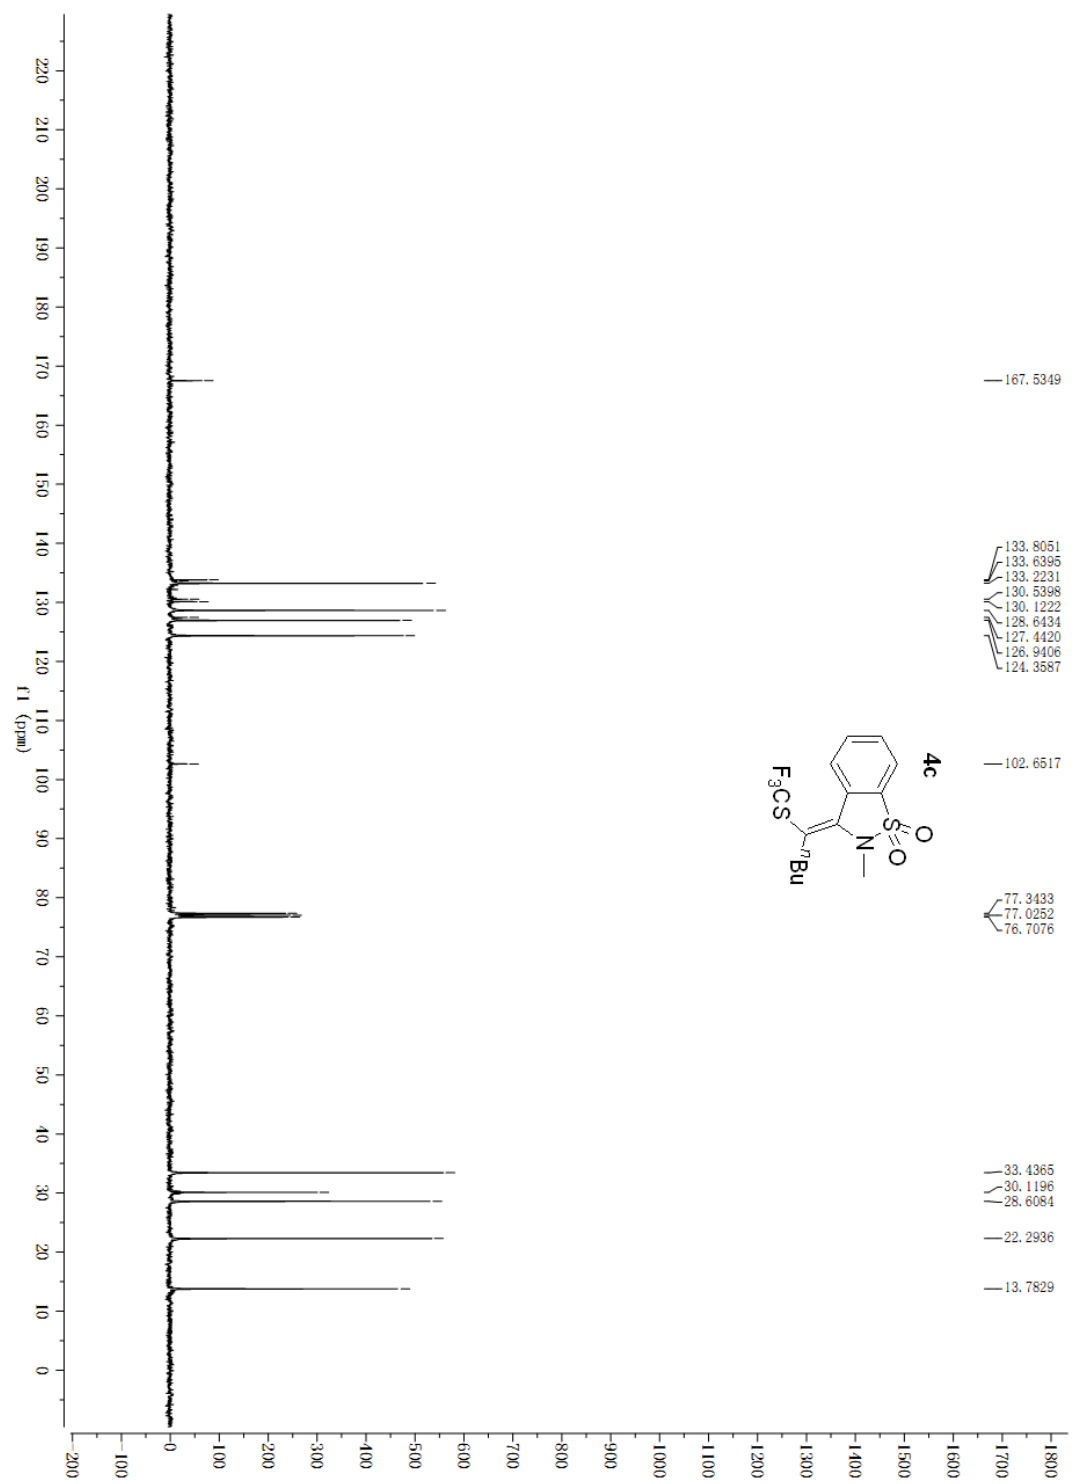

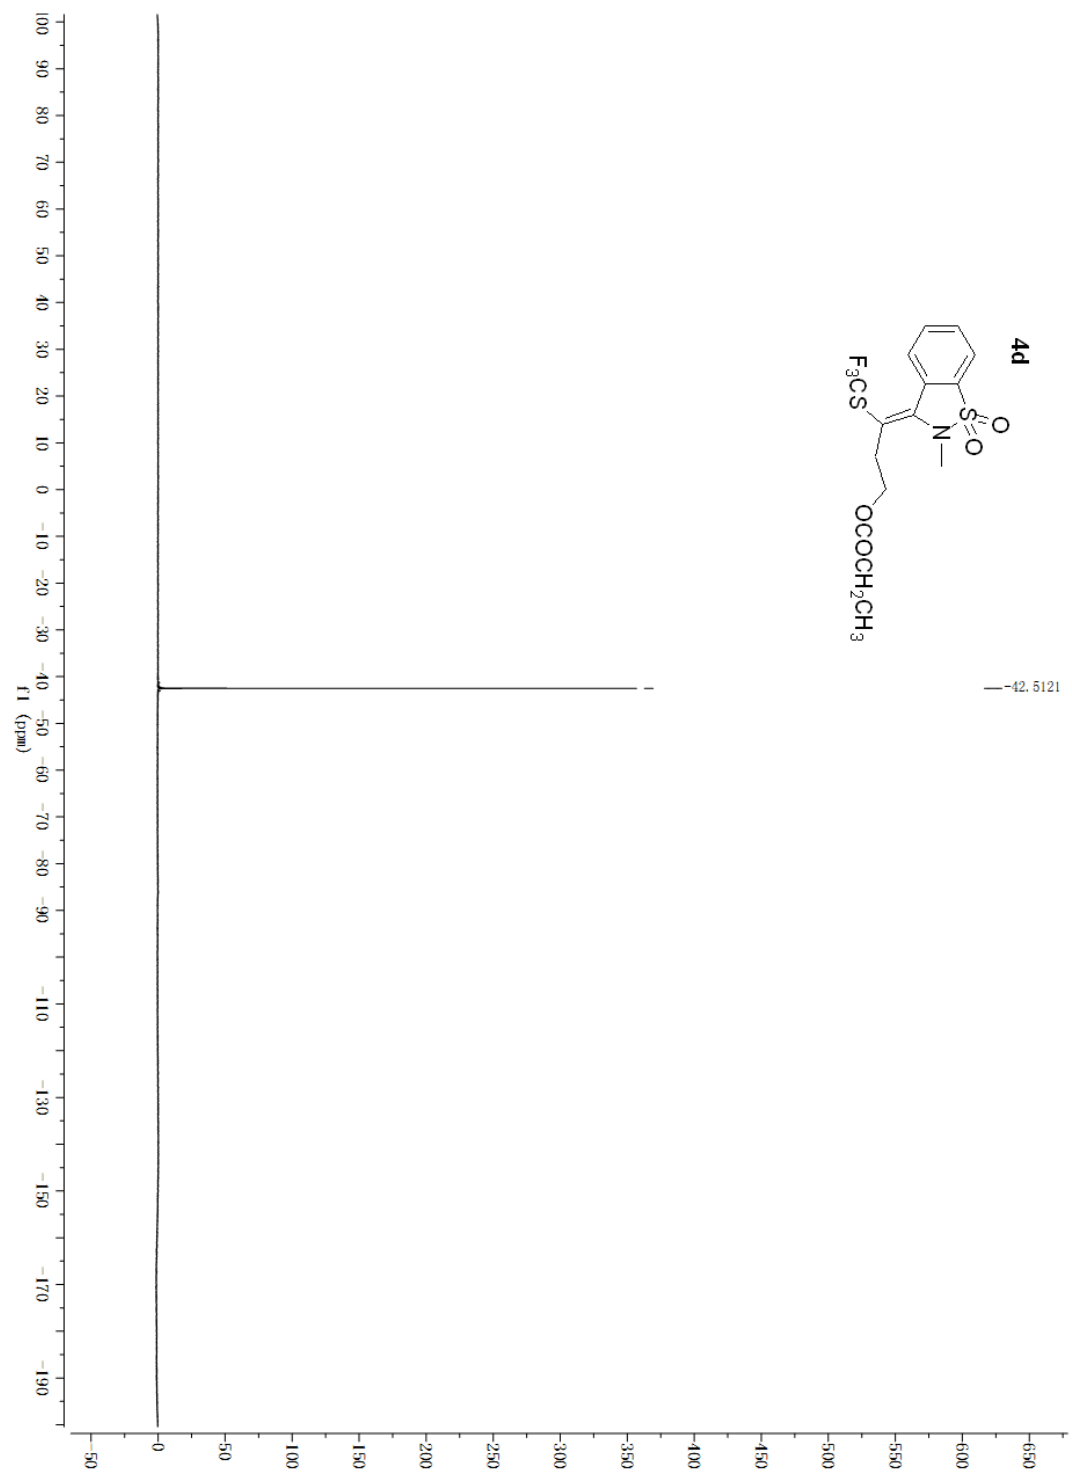

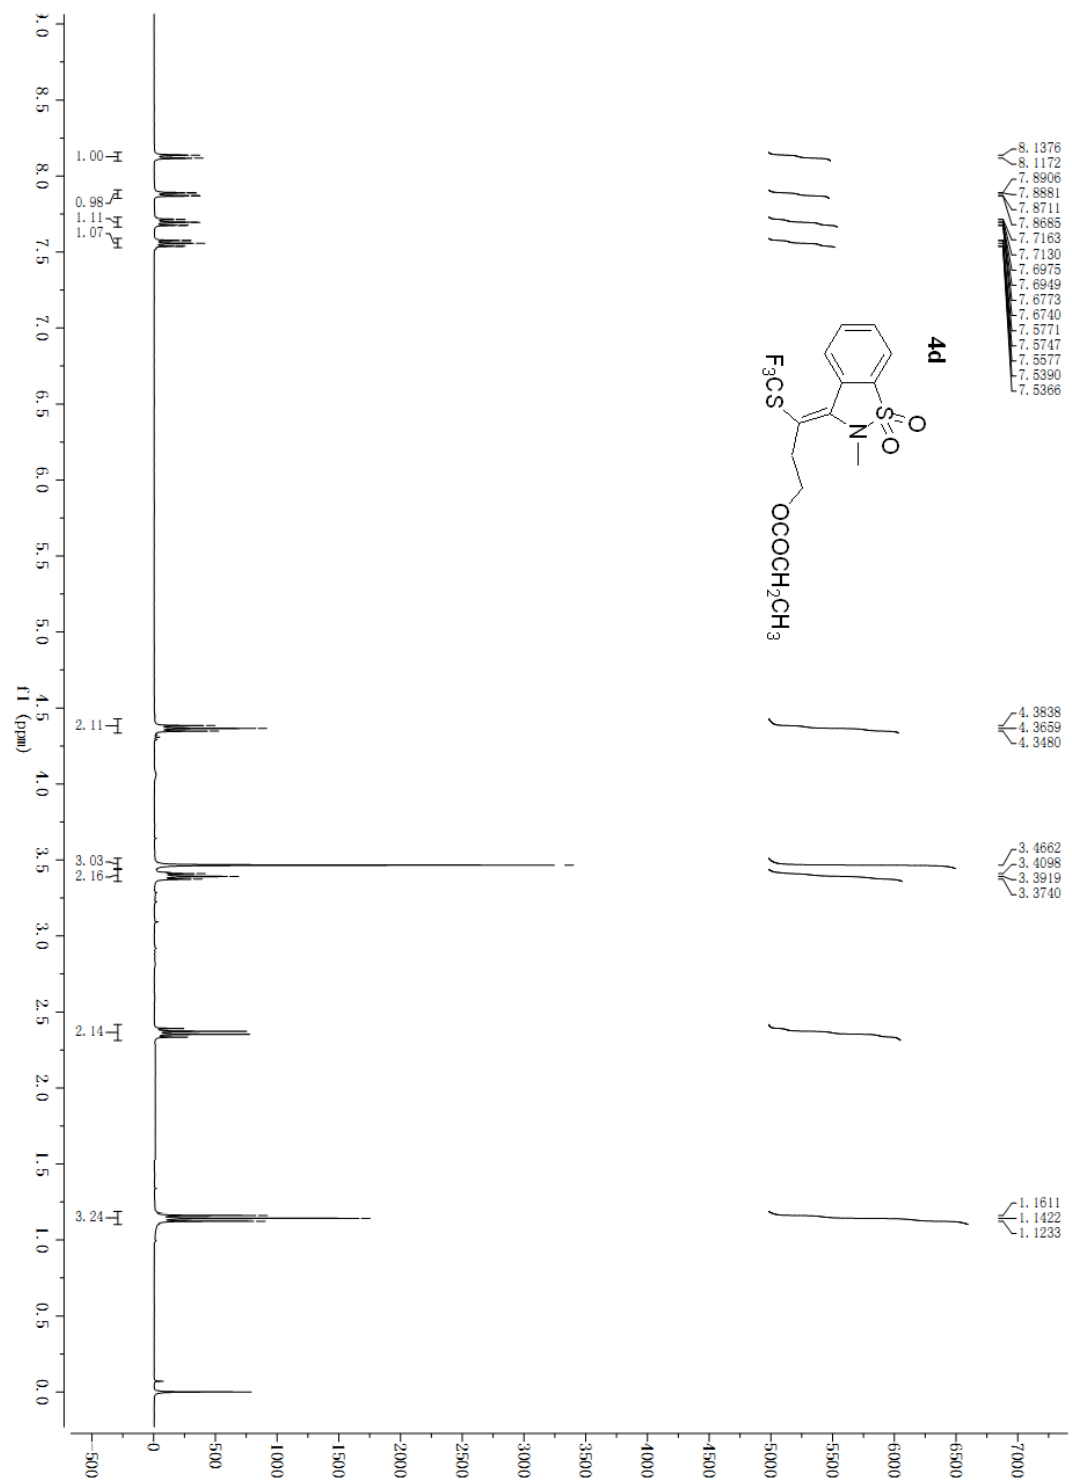

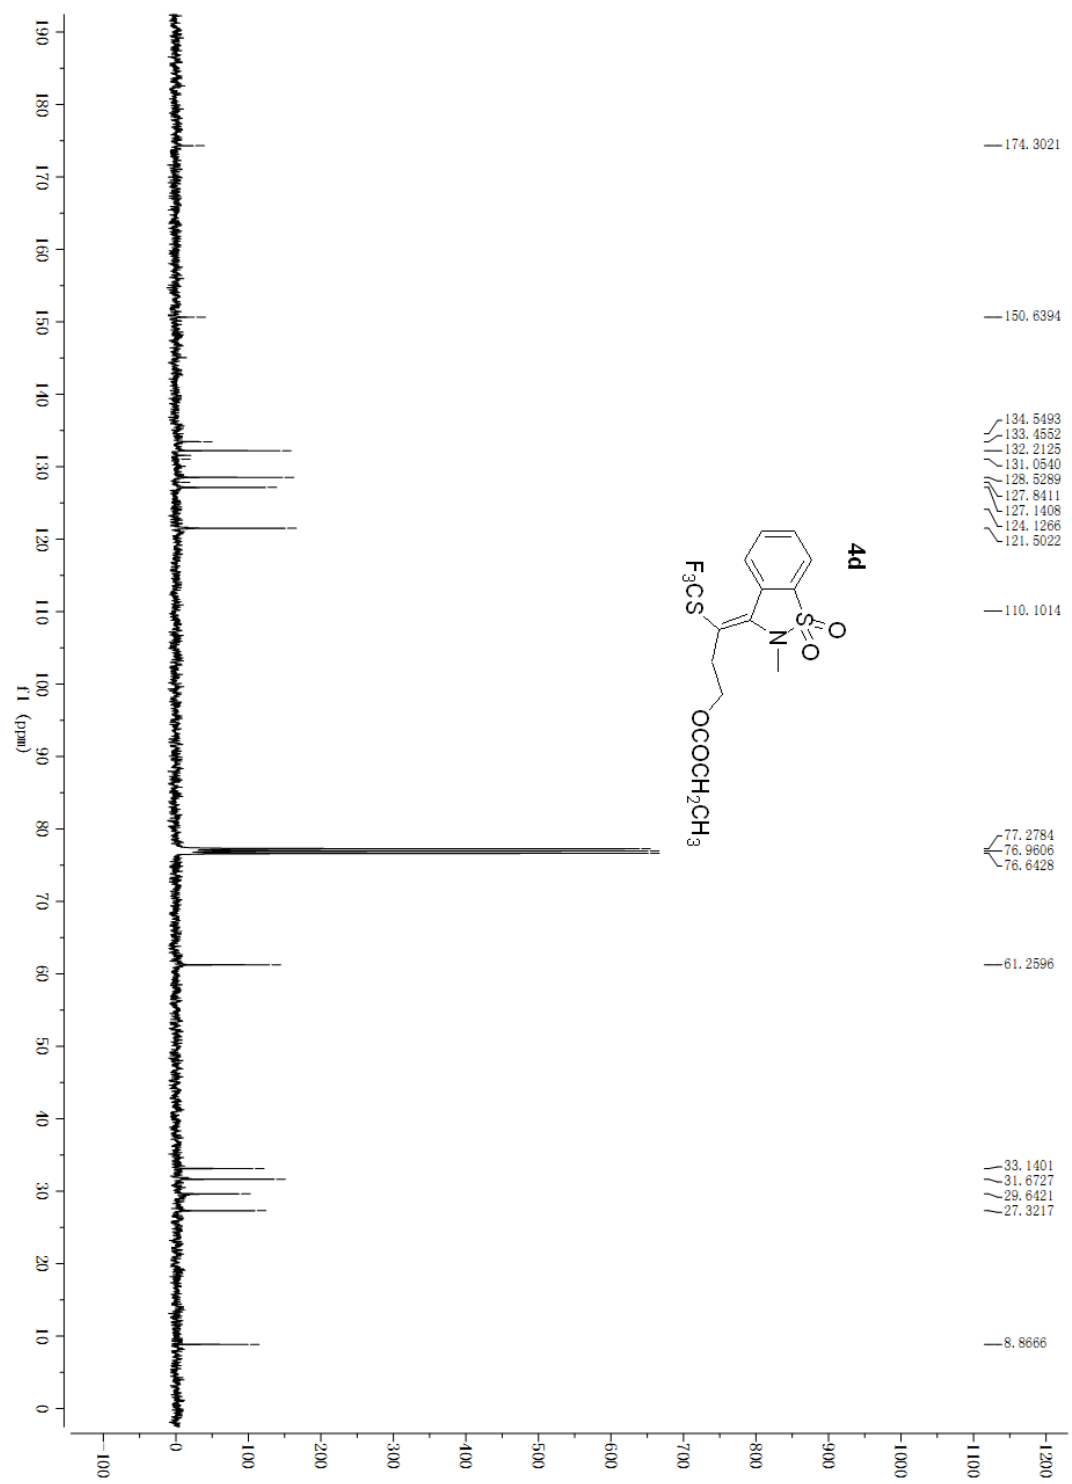

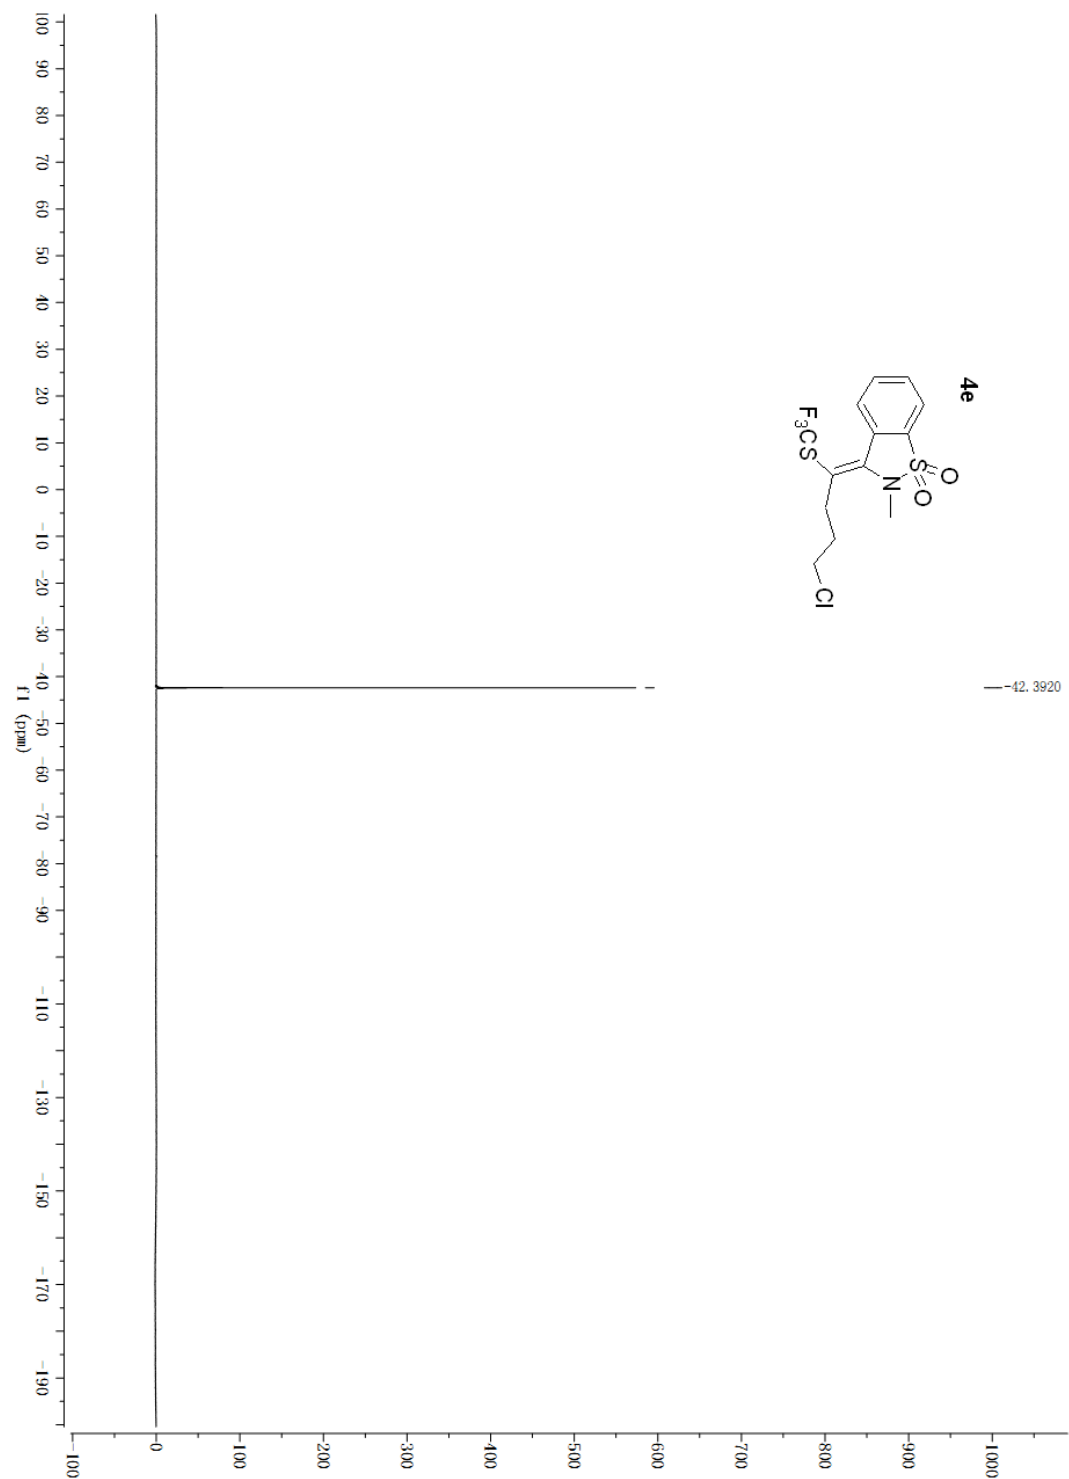



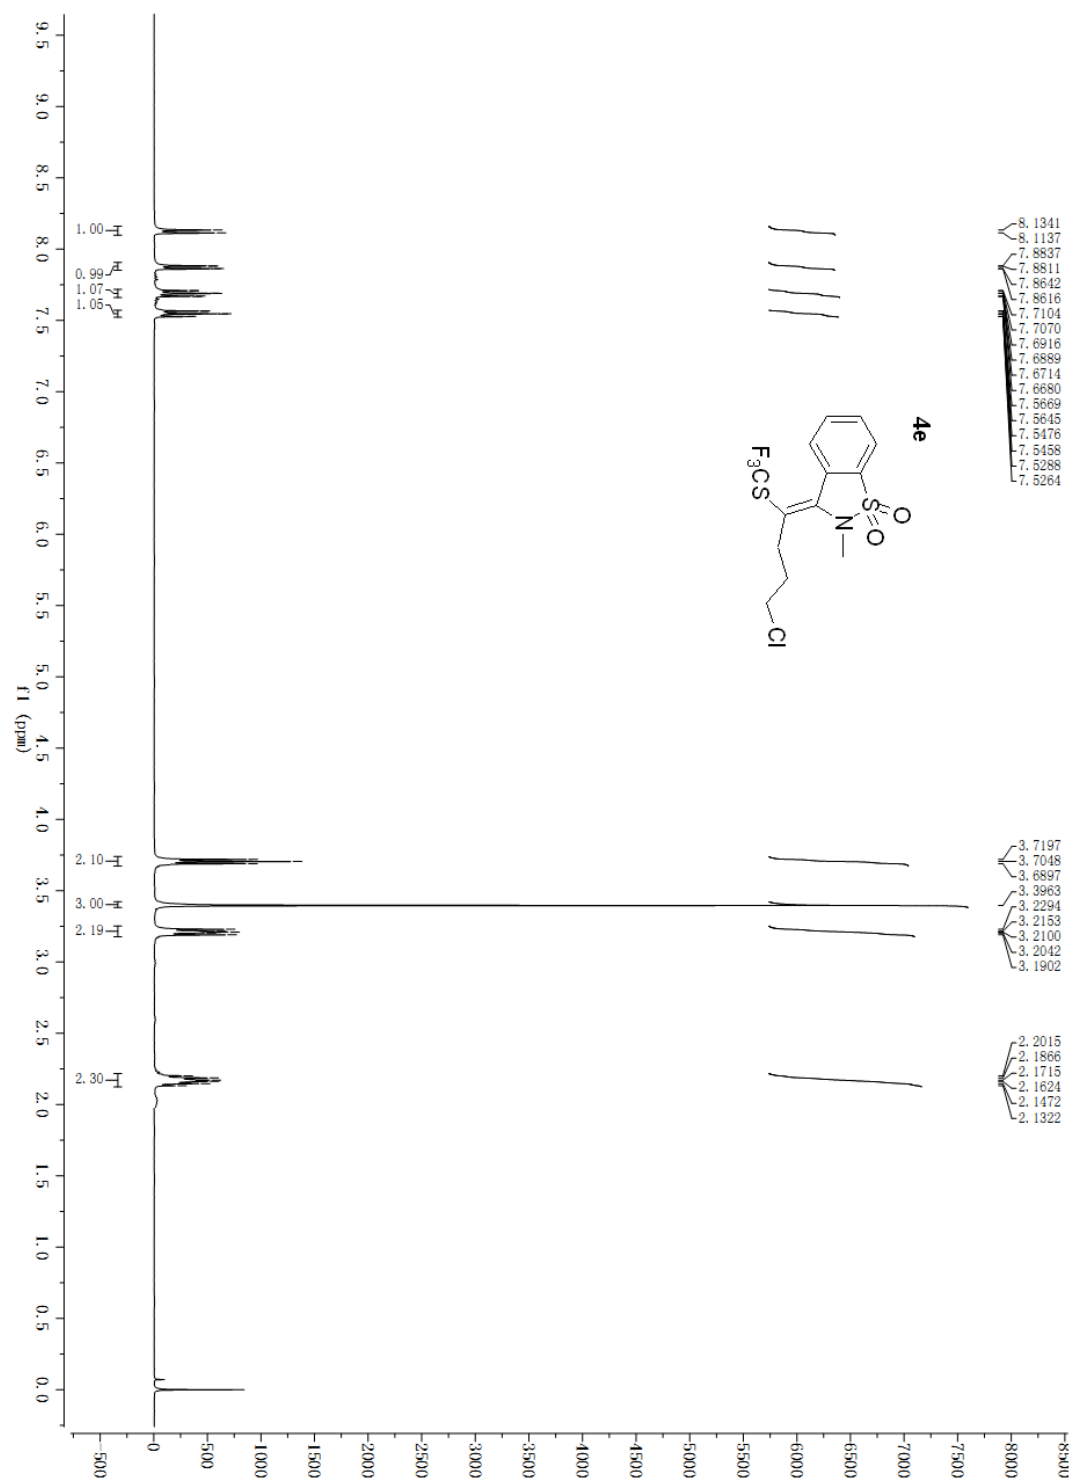

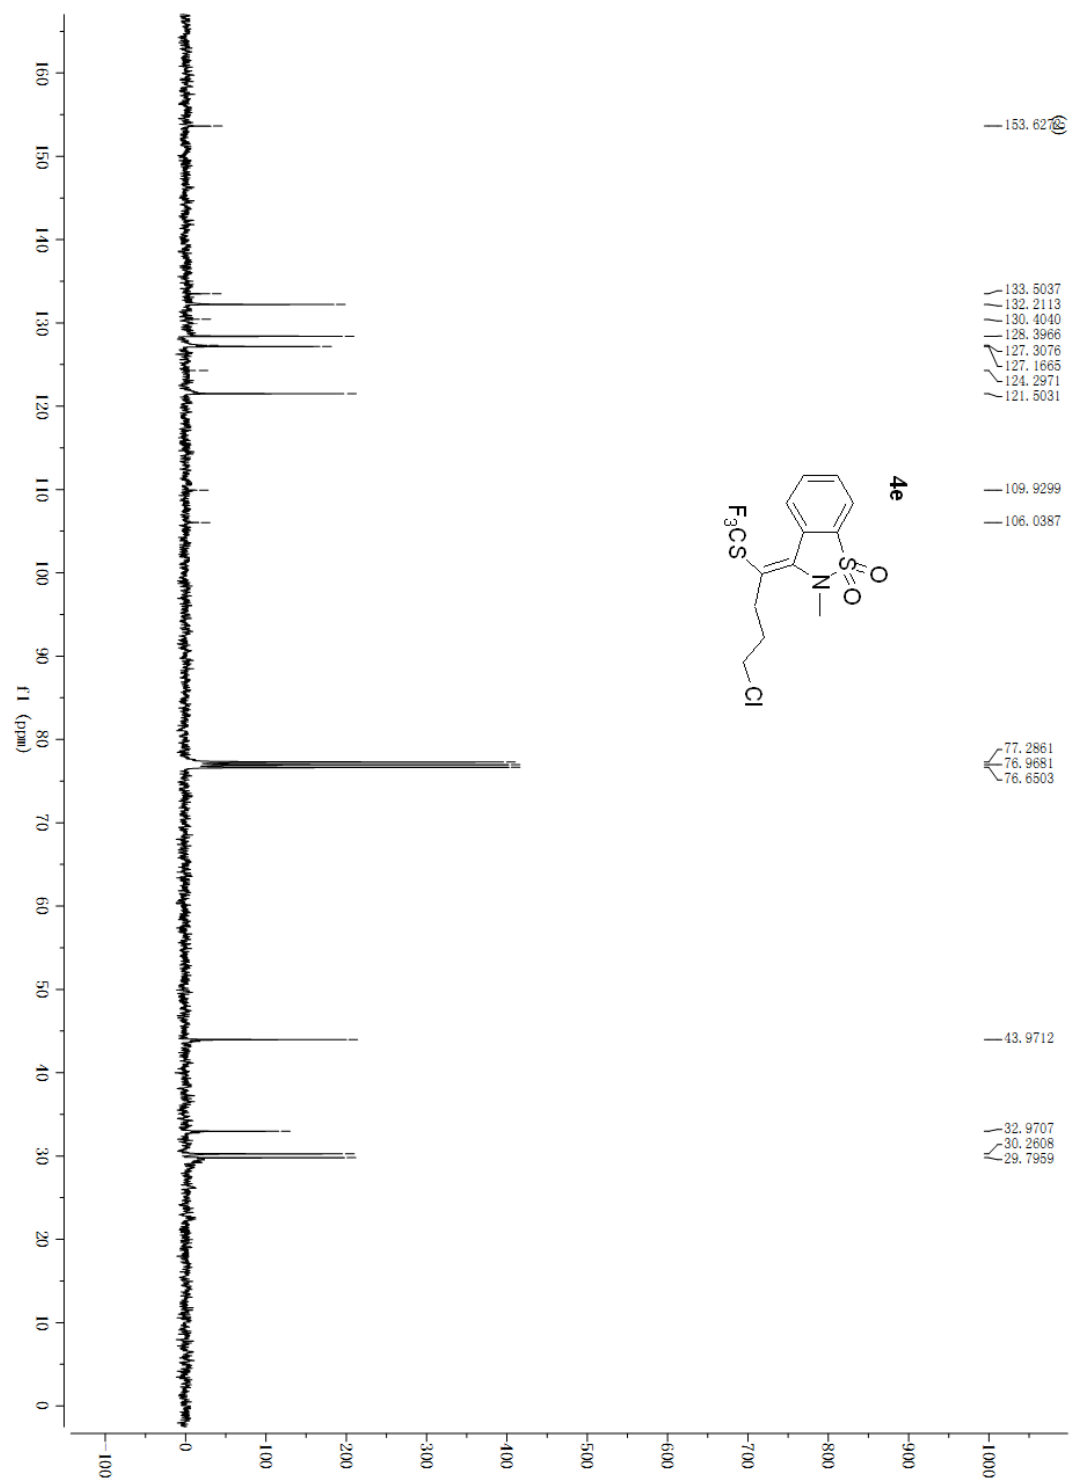

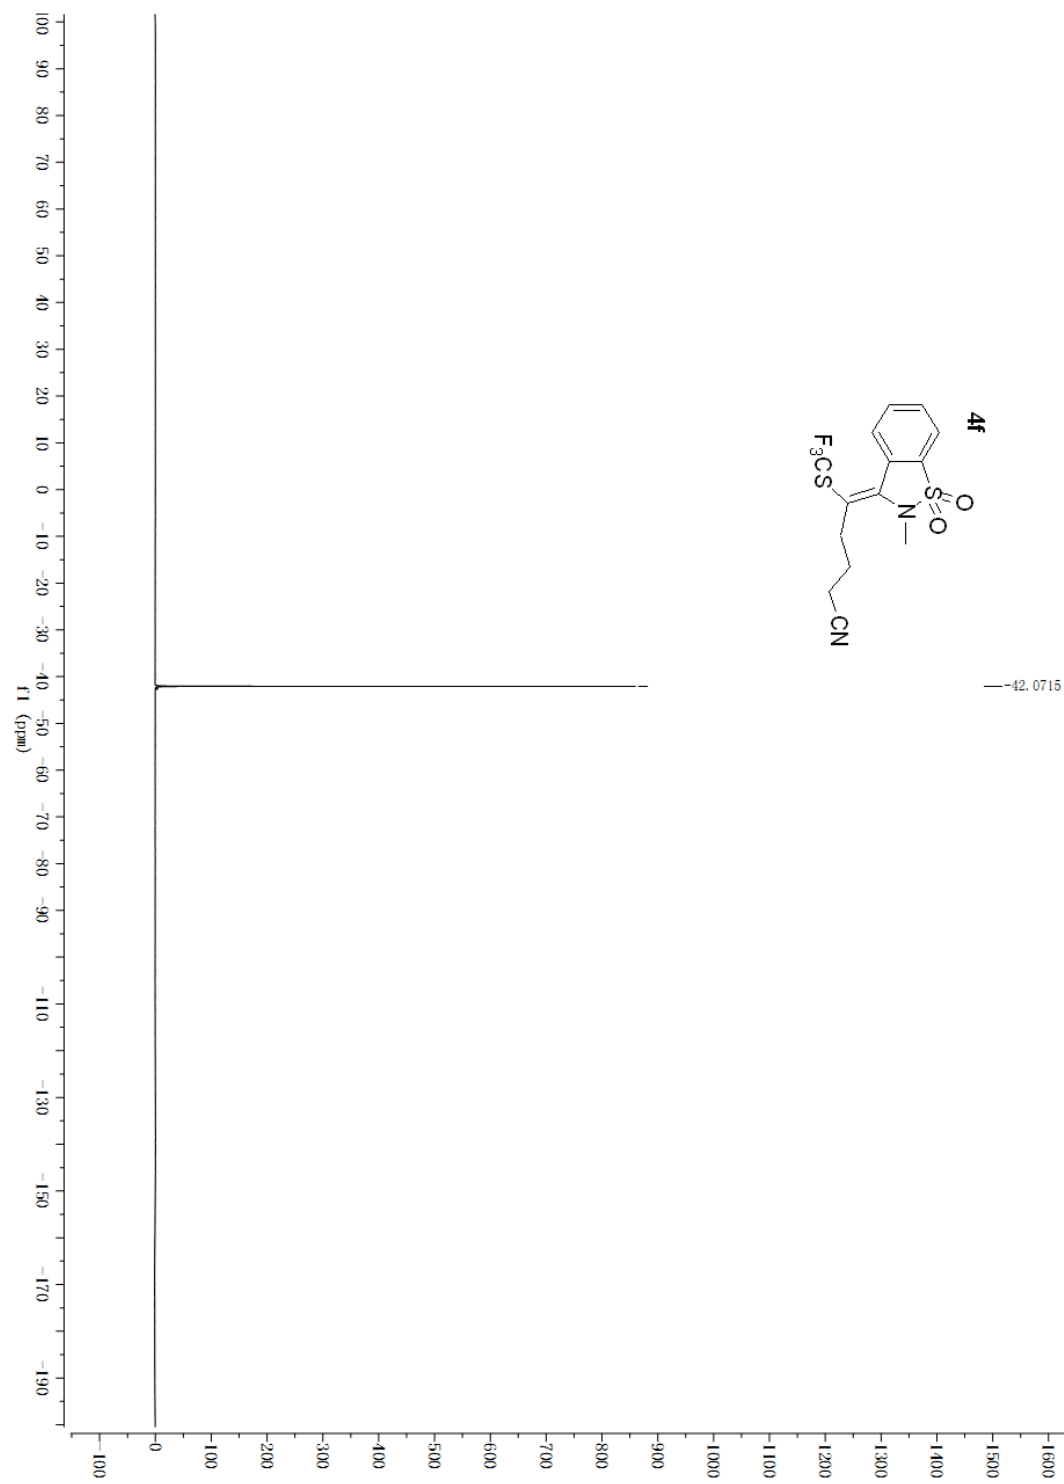

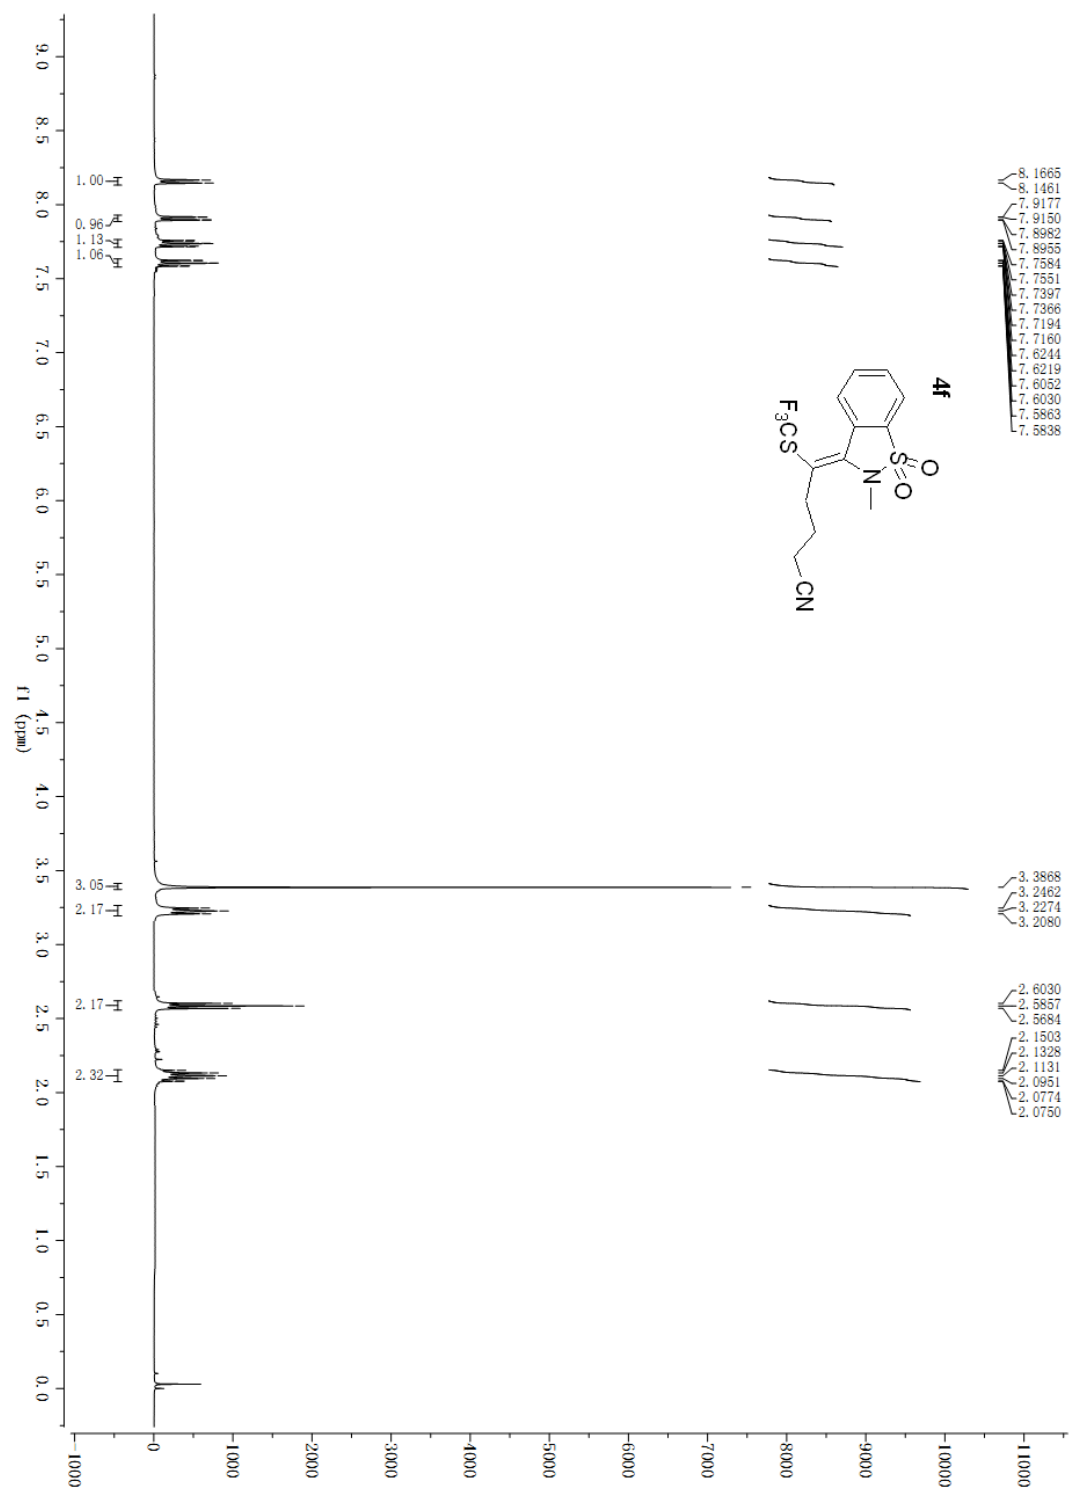

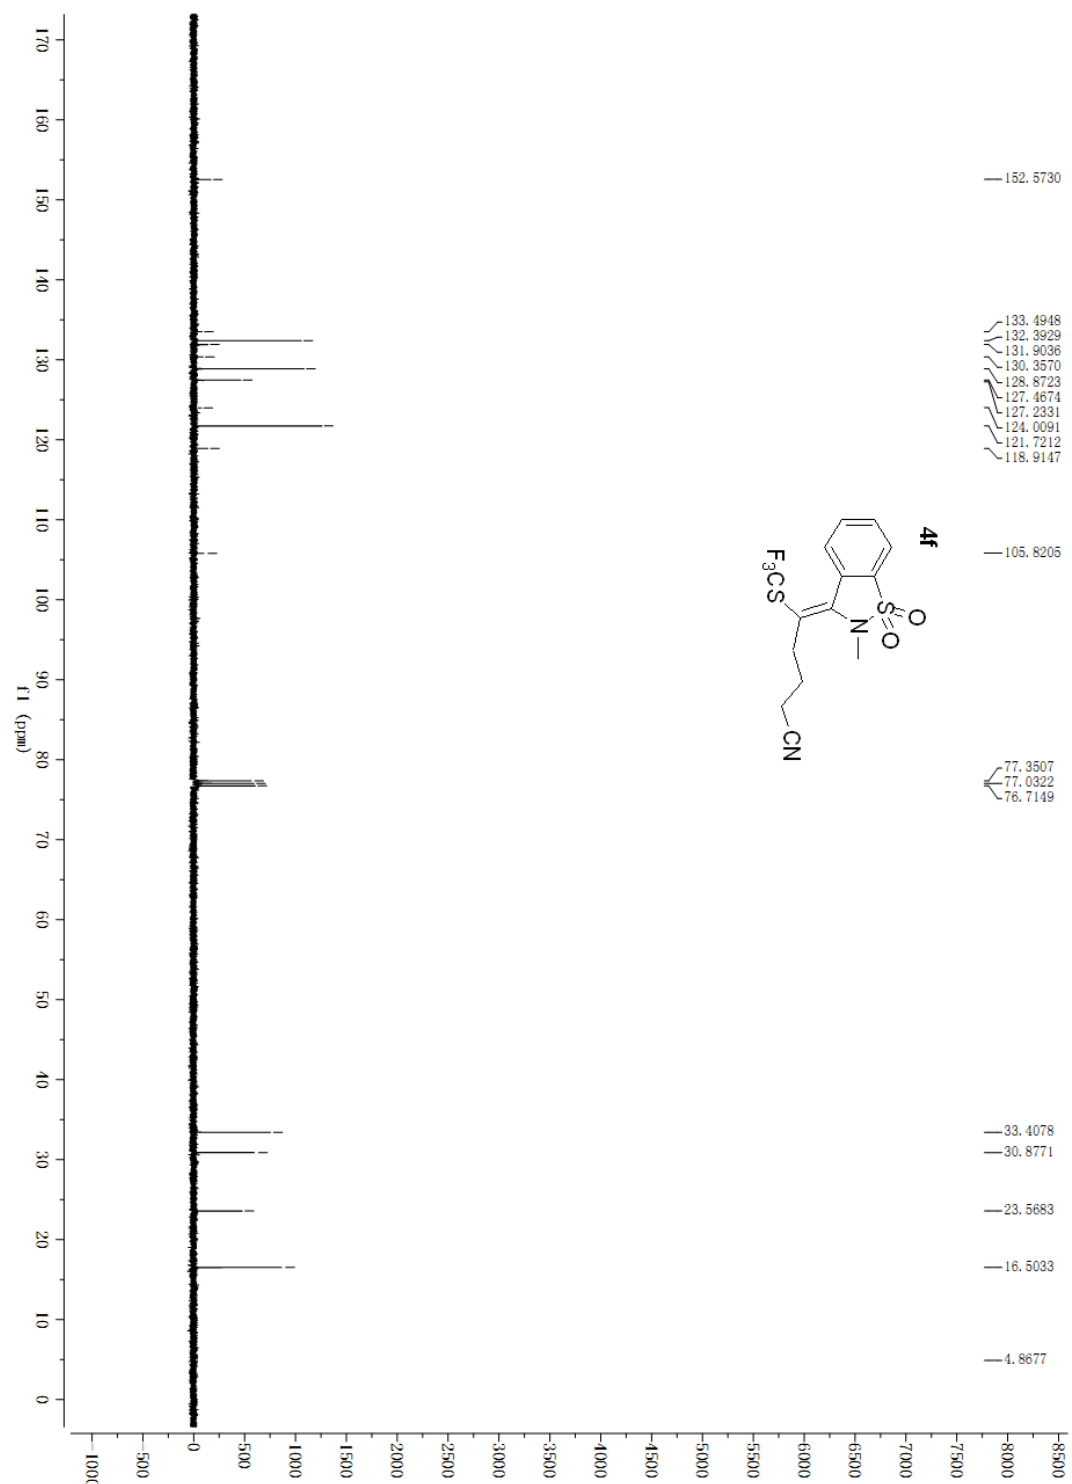

Supplement: c3cc44263b.pdf [file c3cc44263b.pdf]
